# Supplementary material for: Junior doctor skill in the art of physical examination: a retrospective study of the medical admission note over four decades
Source: PubMed Central journal article supplement — BMJ Open. 2013 Apr 3;3(4):e002257. doi: 10.1136/bmjopen-2012-002257 (PMC3641458; doi:10.1136/bmjopen-2012-002257), 2013-04-03
Supplement: bmjopen-2012-002257.draft_revisions.pdf [file bmjopen-2012-002257.draft_revisions.pdf]

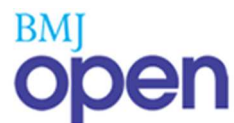

**Junior doctor skill in the art of physical examination: A retrospective study of the medical admission note over four decades**

|                                 |                                                                                                                                                |
|---------------------------------|------------------------------------------------------------------------------------------------------------------------------------------------|
| Journal:                        | <i>BMJ Open</i>                                                                                                                                |
| Manuscript ID:                  | bmjopen-2012-002257                                                                                                                            |
| Article Type:                   | Research                                                                                                                                       |
| Date Submitted by the Author:   | 24-Oct-2012                                                                                                                                    |
| Complete List of Authors:       | Hunter, Selena; University of Otago, Wellington., Dept of Surgery and Anaesthesia<br>Oliver, Charlotte<br>Ikeda, Takayoshi<br>Galletly, Duncan |
| <b>Primary Subject Heading</b>: | Medical education and training                                                                                                                 |
| Secondary Subject Heading:      | Surgery, General practice / Family practice                                                                                                    |
| Keywords:                       | MEDICAL EDUCATION & TRAINING, Medical students, SURGERY                                                                                        |
|                                 |                                                                                                                                                |

SCHOLARONE™  
Manuscripts

1  
2  
3  
4  
5 **Junior doctor skill in the art of physical examination: A retrospective**  
6 **study of the medical admission note over four decades**  
7  
8

9 Charlotte M. Oliver, medical undergraduate<sup>1</sup>, Selena A. Hunter, senior lecturer in  
10 clinical examination<sup>2</sup>, Takayoshi Ikeda, research fellow and biostatistician<sup>3</sup>, and Duncan  
11 C. Galletly, associate professor and head of department<sup>2</sup>  
12

13  
14  
15  
16  
17  
18 <sup>1</sup>School of Medicine and Health Sciences, University of Otago Wellington, PO Box  
19 7343 Wellington South Wellington 6242.  
20

21  
22  
23 <sup>2</sup>Department of Surgery and Anaesthesia, University of Otago, Wellington, 23A Mein  
24 St, Newtown, PO Box 7343, Wellington 6242, New Zealand.  
25  
26

27  
28 <sup>3</sup>Dean's Department, University of Otago, Wellington, New Zealand  
29  
30  
31  
32  
33  
34  
35  
36  
37  
38  
39  
40

41 Correspondence should be addressed to Dr Hunter, c/o Department of Surgery and  
42 Anaesthesia, University of Otago, Wellington, 23A Mein St, Newtown, PO Box 7343,  
43 Wellington 6242, New Zealand.  
44

45 Email: [selena.hunter@otago.ac.nz](mailto:selena.hunter@otago.ac.nz); Phone: 0116443855554; fax: 0116443895318; cell  
46 phone: 0116421390043  
47  
48  
49  
50  
51  
52  
53  
54  
55  
56  
57  
58  
59  
60

## **Abstract.**

**Objectives** To investigate the hypothesis that junior doctors' examination skills are deteriorating by assessing the medical admission note examination record.

**Design** Retrospective study of the admission record.

**Setting** Tertiary care hospital.

**Methods:** The admission records of 266 patients admitted to Wellington hospital between 1975 and 2011 were analysed, according to the total number of physical examination observations (PEO<sub>tot</sub>), examination of the relevant system pertaining to the presenting complaint (RelSystem), and the number of body systems examined (N<sub>systems</sub>). Subgroup analysis proceeded according to admission year, level of experience of the admitting doctor (registrar, house surgeon (HS) and trainee intern (TI)) and medical versus surgical admission notes. Further analysis investigated the trend over time in documentation with respect to cardiac murmurs, palpable liver, palpable spleen, carotid bruit, heart rate, fundoscopy, and apex beat location and character.

**Results:** PEO<sub>tot</sub> declined by 34% from 1975 to 2011. Surgical admission notes had 21% fewer observations than medical notes.

RelSystem occurred in 94% of admissions, with no decline over time. Medical notes documented this more frequently than surgical notes (98% and 86% respectively).

There were no differences between registrars and HS, except for the 2010s subgroup (97% and 65% respectively).

1  
2  
3 Nsystems declined over the study period. Medical admission notes documented more  
4  
5 body systems than surgical notes. There were no differences between registrars, house  
6  
7 surgeons and trainee interns.  
8  
9

10  
11 Less examinations were performed for palpable liver, palpable spleen, cardiac murmur  
12  
13 and apex beat location and character over the study period, however more murmurs  
14  
15 were detected. There was no temporal change in the positive findings of the other  
16  
17 observations or heart rates divisible by 5.  
18  
19

20 **Conclusions:** There has been a decline in the admission record at Wellington hospital  
21  
22 between 1975 and 2011, implying a deterioration in local doctors' physical examination  
23  
24 skills. Measures to counter this trend are discussed.  
25  
26  
27  
28  
29  
30  
31  
32  
33  
34  
35  
36  
37  
38  
39  
40  
41  
42  
43  
44  
45  
46  
47  
48  
49  
50  
51  
52  
53  
54  
55  
56  
57  
58  
59  
60

## **Article Summary**

### **Article focus**

- There is well-documented international evidence supporting a declining standard in junior doctor physical examination skills in recent years.
- This study was conducted to address the research question that this deterioration has occurred locally in Wellington, New Zealand.

### **Key messages**

- There has been a decline in the quantity and quality of the medical admission note examination records in this tertiary care centre between 1975 and 2011, which implies a decline in the examination skills of local junior doctors.
- Measures to address this decay in clinical ability include improved undergraduate curriculum, greater supervision of junior doctors, greater involvement of junior doctors in the admission process and increased staffing levels.

### **Strengths and limitations of this study**

- This is a significant study involving large numbers of patient admission records over a substantial period of time (358 patient records over four decades) with a multitude of statistically robust outcome measures analysed.
- Our study is limited due to its retrospective nature, the use of the “surrogate” marker of the written medical record to reflect clinical examination skills, and the confusing admission process, whereby doctors will see a patient but not necessarily “admit” them.

## **Introduction.**

Thoughtful history taking and physical examination are recognised as fundamental to the practice of medicine.<sup>(1)</sup> Moreover, physicians rate physical examination as their most valuable skill.<sup>(2)</sup> It has also been shown that despite the current technology, physical examination remains important due to its diagnostic contribution,<sup>(3)</sup> positive effect on patient care<sup>(4)</sup> and cost reduction.<sup>(5)</sup>

There has been a well recognised international decline in the physical examination skills of doctors. Potential reasons for this deterioration include busy clinical workloads and lack of clinical teaching.<sup>(6,7)</sup> However it is generally recognised that the most important influence has been the increased availability of specialised diagnostic equipment.<sup>(8,9)</sup> Imaging technology such as ultrasound, CT and MRI have overshadowed the use of physical examination for diagnostic information.<sup>(8,9)</sup>

Although adding enormously to the cost of health care, these investigations are seen to be more accurate and less liable to litigation, than the more subjective art of physical examination.<sup>(8,9)</sup> It has been argued that the overuse of this technology has also helped to erode the teaching and skill in physical diagnosis<sup>(8,10)</sup> and that it may be undermining the value of these skills.<sup>(4)</sup> This is further impacted by the shift away from bedside teaching and supervision of physical examination skills during undergraduate years and early years of practice.<sup>(6,10,11)</sup> In the United States bedside teaching has fallen from 75% of clinical teaching in the 1960s<sup>(10)</sup> to 8-19% of clinical teaching in 2008.<sup>(12)</sup> Thus there are significant changes required from both the medical school and

1  
2  
3 hospital culture regarding physical examination skill acquisition, improvement and  
4  
5 retention.  
6  
7  
8  
9

10  
11 The medical record is a tool for communication between multiple health professionals,  
12 facilitating continuity of care and good patient management.<sup>(13)</sup> There have been a  
13 number of studies referencing the importance of the quality of the medical record.<sup>(14-19)</sup>  
14  
15 The medical record is also a legal document and as such deserves the appropriate time  
16 and attention to ensure it is “comprehensive and accurate”.<sup>(13)</sup> Some studies have  
17 looked into ways to improve documentation such as introducing a clinical note header  
18 section,<sup>(20)</sup> education and instruction<sup>(21, 22)</sup> and structured encounter forms<sup>(23)</sup> with  
19 positive results. There are currently no evidence based standards for best practice  
20 concerning adequacy of documentation of physical examination findings for Wellington  
21 Hospital, neither are there any clinical guidelines derived from expert opinion. Thus it  
22 is difficult to ascertain the expected minimum level of documentation. In order to  
23 retrospectively investigate examination practice over time we are reliant on this medical  
24 record for our information. The current study is inevitably an investigation into both the  
25 skills of doctors and their documentation practices, although our primary interest is the  
26 assessment of physical examination skills.  
27  
28  
29  
30  
31  
32  
33  
34  
35  
36  
37  
38  
39  
40  
41  
42  
43  
44  
45  
46  
47

## 48 **Methods**

49  
50 We looked at admission records from patients admitted to Capital and Coast District  
51 Health Board (Wellington and Kenepuru Hospitals) between 1975 and 2010. The  
52 records were randomly selected by National Health Index (NHI) number if the patient  
53  
54  
55  
56  
57  
58  
59  
60

1  
2  
3 had been admitted during this time with certain medical diagnoses, as reflected by the  
4  
5 “coding diagnosis” which enables clerical staff to enter the correct computer  
6  
7 information about each admission. In this way we obtained 300 sets of patient  
8  
9 admission records, 100 from 1998, 100 from 2000 and 100 from 2010, from the medical  
10  
11 records department at Wellington Hospital. Out of each set of 100 records there were 50  
12  
13 general medical and 50 surgical admissions. The medical coding diagnoses were  
14  
15 pneumonia, congestive heart failure, shortness of breath or chest pain. The surgical  
16  
17 coding diagnoses were inguinal hernia, appendicitis, abdominal pain, fractured neck of  
18  
19 femur or bowel obstruction. Many of these files included records from previous  
20  
21 admissions to hospital. We included these older records if they had been coded with  
22  
23 the aforementioned diagnoses, and if there was at least 10 years temporal separation  
24  
25 from the randomly selected admission. Strict patient and staff confidentiality was  
26  
27 maintained at all times.  
28  
29  
30  
31  
32  
33  
34  
35

36 The admission note from each record was examined and the relevant data was extracted.  
37  
38 If there was no admission note, we examined the last documented examination in the  
39  
40 emergency department before ward admission. This was generally performed by the  
41  
42 registrar of the admitting ward.  
43  
44  
45  
46  
47

48 We recorded the total number of physical examination observations (PEOtot) that were  
49  
50 documented per admission. We also documented the number of major body systems  
51  
52 that had been examined (NSystems). These included cardiovascular, gastrointestinal,  
53  
54 respiratory, central nervous and musculoskeletal systems. We then noted whether the  
55  
56  
57  
58  
59  
60



1  
2  
3 relevant system pertaining to the presenting complaint had been examined (RelSystem).  
4

5 We then analysed the data in terms of year groups, in order to look for temporal change.  
6  
7

8  
9  
10  
11 We subsequently analysed the data according to whether it was a medical or surgical  
12 admission note, and the level of experience of the admitting doctor (registrars, house  
13 surgeons (HS) or trainee interns (TI)) with respect to PEOtot, Nsystems and RelSystem.  
14  
15

16 We also performed year group analysis on these subgroups.  
17  
18  
19

20  
21  
22  
23 We also investigated whether there was documentation of particular examination  
24 observations, positive or negative. These were palpable liver, palpable spleen, carotid  
25 bruit, cardiac murmur, apex beat location and character and fundoscopy. We analysed  
26 whether the frequency of these documented observations changed over time. Of the  
27 admission notes documenting the performance of these examinations, we then examined  
28 the frequency of positive findings and any change over time.  
29  
30  
31  
32  
33  
34  
35  
36  
37  
38  
39  
40

41 Finally we investigated the documentation of heart rate. Of those admission notes with  
42 a heart rate value, we analysed the frequency of the heart rates divisible by 5 and any  
43 change over time.  
44  
45  
46  
47  
48  
49  
50

## 51 **Results.**

52  
53  
54  
55 We looked at 358 patient admission records, from 266 patients admitted to Capital and  
56 Coast District Health Board (Wellington and Kenepuru Hospitals) between 1975 and  
57  
58  
59  
60

2010. For administrative reasons we were unable to obtain 34 of the ordered sets of notes. There was no statistically significant difference in the patients' age between the year groups, after Kruskal-Wallis analysis.

As evidenced by the documentation in the hospital record admission notes, there has been a statistically significant decrease (34%) in the total number of physical examination observations per admission (PEOtot) from 1975 to 2011 ( $p < 0.001$ ). (Figure 1).

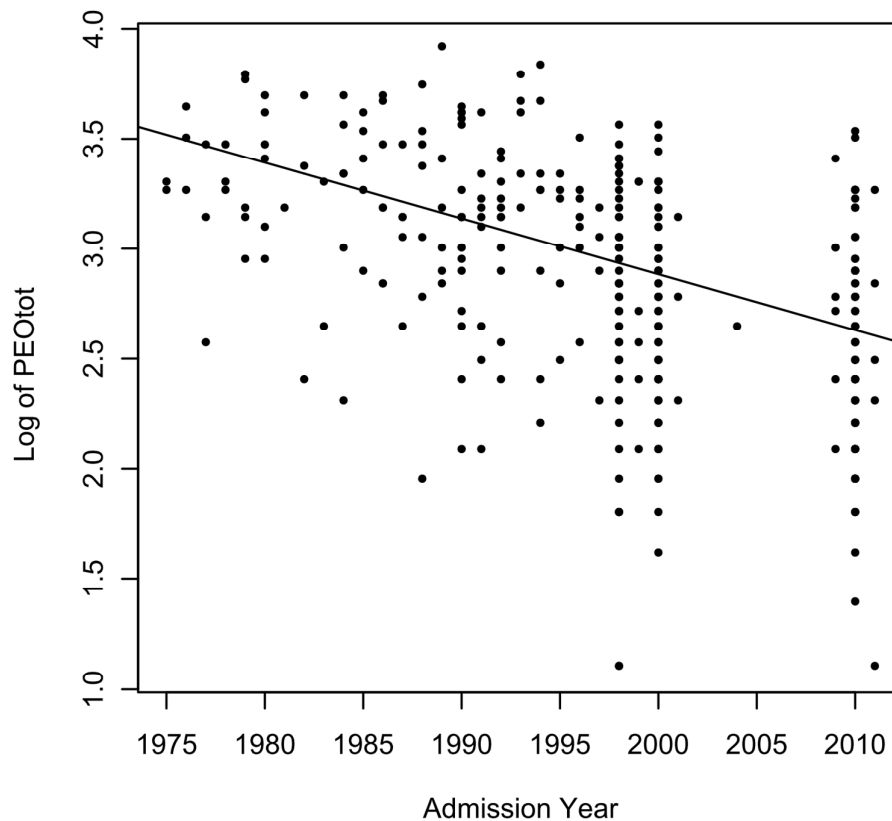

Figure 1: Total number of physical examination observations per admission (PEOtot) versus time.

1  
2  
3 There were significantly fewer (21%) total observations in surgical admission notes,  
4 compared to medical admission notes ( $p < 0.001$ ). Registrars recorded 12% fewer total  
5 observations compared to house surgeons ( $p < 0.001$ ). Statistical significance with  
6 respect to admission year group, speciality and level of experience of the admitting  
7 doctor in terms of predicting PEOtot was achieved by using the Wald chi-square test.  
8 PEOtot was analysed as a negative binomial regression model (overdispersed data) by  
9 rendering the 'admission year' as a continuous variable and the 'admission ward' and  
10 'doctor level of experience' as categorical variables.  
11  
12  
13  
14  
15  
16  
17  
18  
19  
20  
21  
22  
23

24 With respect to the examination of the relevant system pertaining to the presenting  
25 complaint (RelSystem), we have found that this occurred in 94% of all admission notes  
26 (95% C.I.) and there was no statistically significant change over time ( $p < 0.1$ ). There  
27 was however a significant difference according to speciality, with surgical doctors less  
28 likely to have examined RelSystem compared to their medical counterparts (86% vs  
29 98% respectively,  $p < 0.001$ ). Further subanalysis of speciality and RelSystem with  
30 respect to year group showed no statistically significant differences except for the  
31 2010s, in which 25% of surgical admissions did not record examination of the relevant  
32 system compared with 3% of medical admissions ( $p < 0.05$ ); (pre 1990s ( $p > 0.05$ ), 1990s  
33 ( $p < 0.1$ ) 2000s ( $p < 0.1$ )).  
34  
35  
36  
37  
38  
39  
40  
41  
42  
43  
44  
45  
46

47 There was no statistically significant difference overall between examination of the  
48 relevant system pertaining to their presenting complaint (RelSystem) with respect to  
49 level of experience of admitting doctor (registrar, house surgeon and trainee intern)  
50 ( $p < 0.01$ ). Further analysis by year groups shows a difference only for the 2010s, in  
51  
52  
53  
54  
55  
56  
57  
58  
59  
60

1  
2  
3 which registrars documented RelSystem in 97% of admissions compared to 65% of  
4  
5 house surgeons ( $p<0.005$ ).  
6  
7  
8  
9

10  
11 The total number of body systems examined (Nsystems) significantly declined over the  
12  
13 study period, with a change of 1.184 mean body systems ( $p<0.001$ ). (Figure 2).  
14  
15

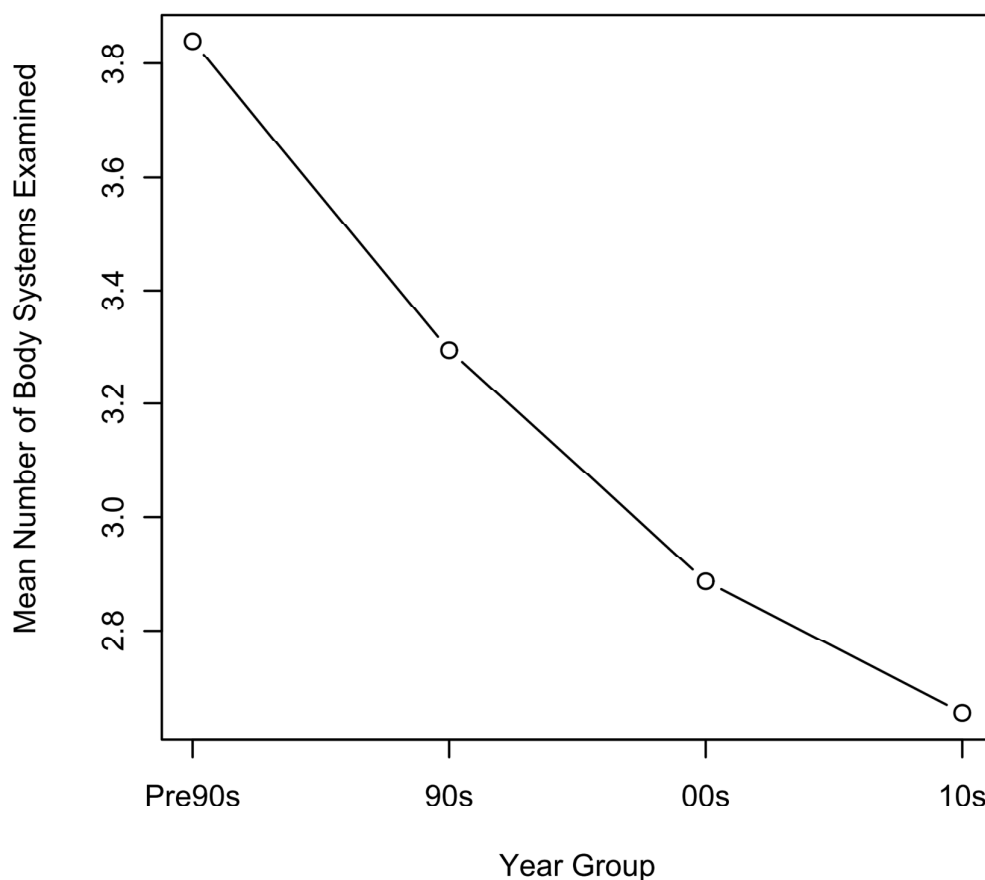

46  
47  
48  
49  
50  
51  
52  
53  
54  
55  
56  
57  
58  
59  
60

Figure 2: Mean number of body systems examined per year group.

There was a significant difference according to speciality between medical and surgical admissions, with surgical doctors examining less Nsystems than physicians ( $p<0.01$ ).

There were no significant differences between speciality within each of the year groups

1  
2  
3 (p<0.1). With respect to the level of experience of the admitting doctor, there were no  
4  
5 significant differences in Nsystems (p>0.5) or within year groups (p<0.1).  
6  
7

8  
9  
10  
11 There was a significant decline over the study period in the percentage of admission  
12 notes with recorded examinations for palpable liver, palpable spleen, cardiac murmur  
13 and apex beat location and character (p<0.001; chi-square values of 51.3, 47.8, 32.0,  
14 57.9 and 24.2 respectively, 1df). Statistical analysis was performed by Cochran-  
15 Armitage testing, and 95% confidence intervals were used. There was no significant  
16 change in the frequency of recorded examinations for carotid bruits (p>0.5; chi-square =  
17 0.4, 1 df). There was no year group analysis performed for fundoscopy, as this was only  
18 documented in the pre 90s year group. ). (Figure 3a)  
19  
20  
21  
22  
23  
24  
25  
26  
27  
28  
29  
30  
31  
32  
33  
34  
35  
36  
37  
38  
39  
40  
41  
42  
43  
44  
45  
46  
47  
48  
49  
50  
51  
52  
53  
54  
55  
56  
57  
58  
59  
60

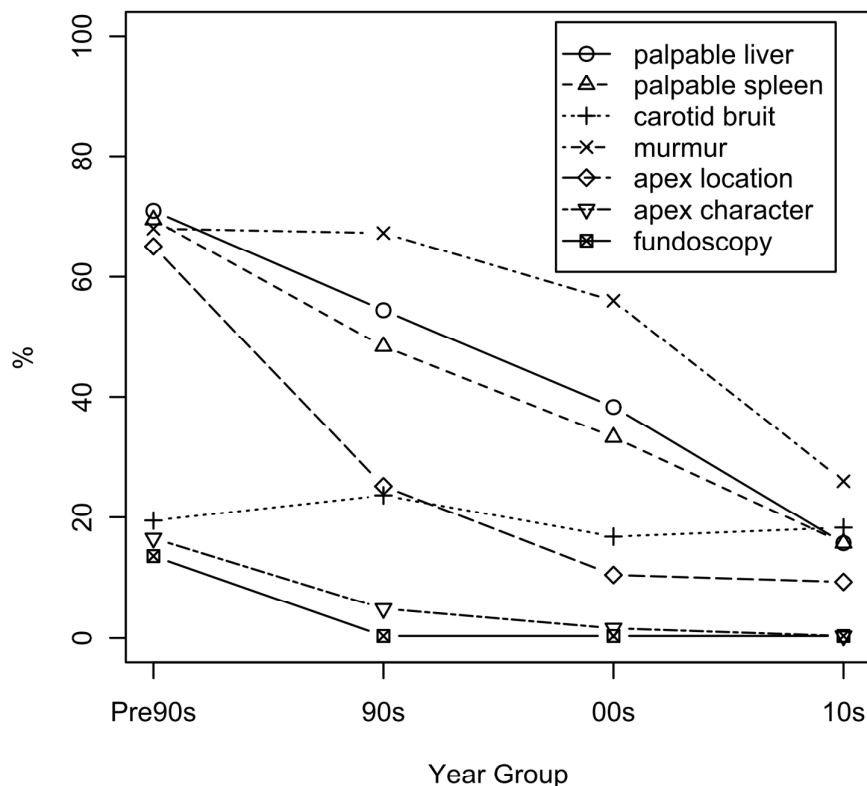

Figure 3a: Percentage of admission notes with recorded examinations for palpable liver, palpable spleen, carotid bruit, murmur, apex location, apex character and funduscopy versus year group.

The percentage of admission notes documenting a positive cardiac murmur increased over the study period, out of the notes showing a relevant examination had been performed ( $p < 0.01$ , chi-square 7.5, 1df). There were no changes over time in positive findings with respect to palpable liver, palpable spleen, carotid bruit and apex beat location and character ( $p > 0.1$ , chi-square 1.5, 1.8, 1.7, 0.2, and 0.5 respectively, 1 df). This is probably due to the low frequency of positive findings within each of the year groups. Statistical analysis was performed by Cochran-Armitage testing, and 95% confidence intervals were used. (Figure 3b).

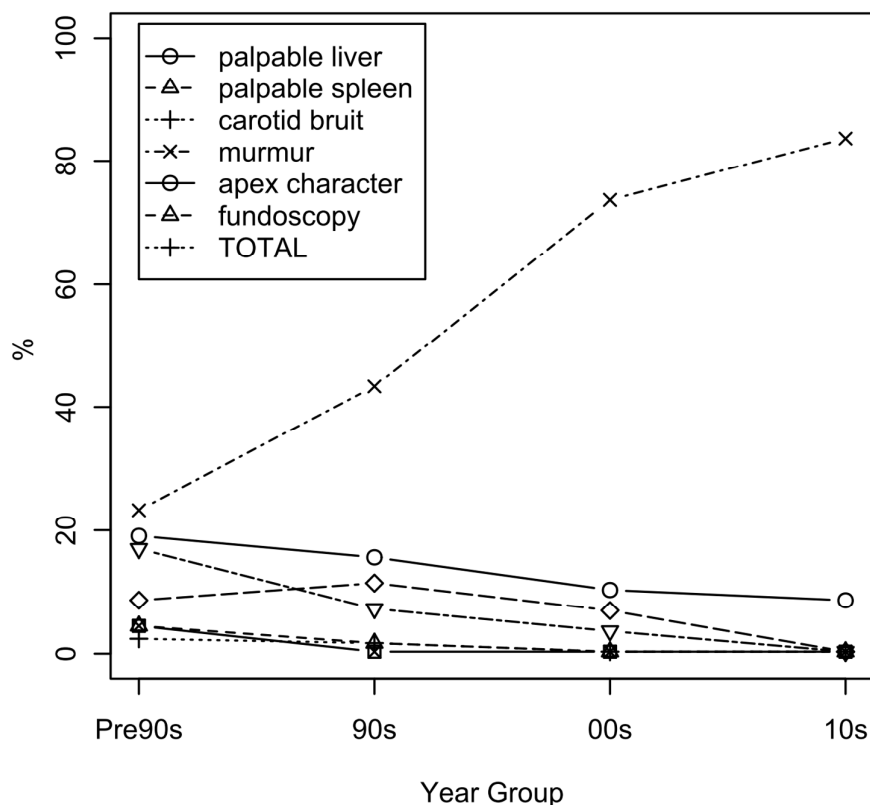

Figure 3b: Percentage of admission notes with positive findings for palpable liver, palpable spleen, carotid bruit, murmur, apex location, apex character and funduscopy versus year group.

We found that the vast majority of admission notes documented heart rate, with approximately 50% in each year group documenting a heart rate divisible by five and no change over time with respect to the latter ( $p > 0.5$ , chi-square 0.8, 1df). Statistical analysis was provided by Cochran-Armitage testing, and 95% confidence intervals were used. (Figure 4).

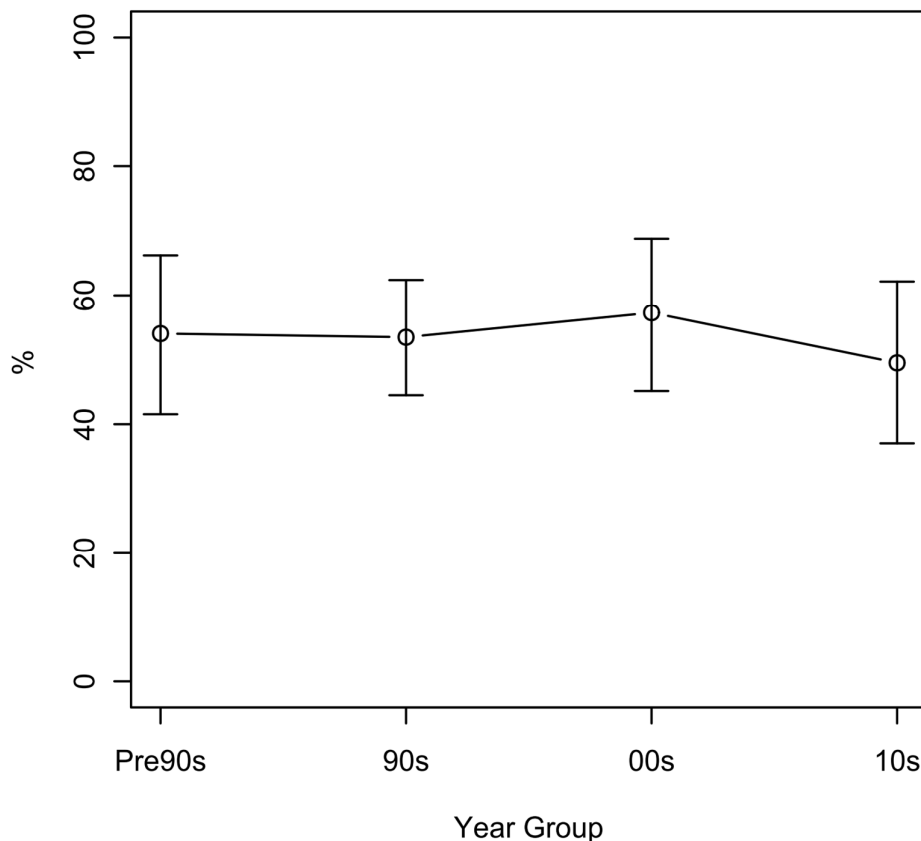

Figure 4: Percentage of heart rate observations divisible by five according to year group.

## Discussion

Thus the results imply that there has been deterioration in the physical examination skills of junior doctors in Wellington Hospital from 1975 to 2010, after detailed analysis of the medical admission record notes. This is evident from the observed decline in the recorded total number of physical examination observations, total number of body systems examined and the number of recorded observations for palpable liver, palpable spleen, cardiac murmur and apex beat location and character. In the author's opinion,



1  
2  
3 this temporal deterioration could be due to the increased use and availability of complex  
4 diagnostic technology<sup>(8,9)</sup> as well as the concurrent loss of confidence in physical  
5 examination skills. Busy workloads<sup>(24)</sup> often necessitate substandard physical  
6 examinations and the resulting documentation. Low examination skill proficiency after  
7 initial training, and little opportunity to improve these skills<sup>(6,7)</sup> and the resultant effect  
8 on student and teacher confidence further contribute to the demise of clinical  
9 examination.  
10  
11  
12  
13  
14  
15  
16  
17  
18  
19  
20  
21

22 Interestingly there has been no reduction in the examination of the relevant system  
23 pertaining to their presenting complaint (RelSystem). It could be argued that the latter  
24 constitutes the ‘bare minimum’, and hence has suffered less than the other parts of the  
25 medical admission record. In addition, there was a significant increase over time in the  
26 ratio of documented positive cardiac murmurs, out of the admission records indicating  
27 an examination had been performed. It is unclear why this particular physical  
28 observation has ‘improved’ over time. It could be due to particular clinical focus on  
29 cardiac auscultation in the undergraduate program, from students or clinicians or both.  
30 A more statistical explanation is supplied by the low frequencies of positive findings  
31 within each of the year groups for palpable liver, palpable spleen, apex beat location  
32 and character, affecting trend analysis.  
33  
34  
35  
36  
37  
38  
39  
40  
41  
42  
43  
44  
45  
46  
47  
48  
49  
50

51 We found that registrars recorded 12% fewer total observations than house surgeons. In  
52 the authors’ opinion, this could be a reflection of the local admission process, for both  
53 medical and surgical patients. For many years, it has been the convention in Wellington  
54 that the registrar assesses and diagnoses the patient before instigating appropriate initial  
55  
56  
57  
58  
59  
60

1  
2  
3 therapy. Then the team house surgeon is called to finish the ‘clarking’ process – ie  
4  
5 complete the history and examination of the admission, chart the patients medications  
6  
7 and fluids etc. This may not reflect practice in all New Zealand or international  
8  
9 hospitals.  
10

11  
12  
13  
14  
15 It remains unclear why surgical admission notes contain less total observations and  
16  
17 number of body systems than their medical counterparts. In the authors’ opinion,  
18  
19 physicians may arguably take a more holistic approach to their patients, and are hence  
20  
21 more likely to examine more body systems and document a greater number of  
22  
23 examination findings. The differential diagnoses of medical complaints may be broader  
24  
25 than surgical complaints, warranting such a detailed assessment. Junior surgical staff  
26  
27 are frequently time pressured as they are often on call for acute assessments, as well as  
28  
29 being expected to be in the operating theatre. Surgical house officers are the only staff  
30  
31 available to deal with the often complex medical issues in the surgical ward. If this time  
32  
33 pressure is indeed a true factor in the declining standards of the surgical admission note,  
34  
35 greater surgical staffing resources could ameliorate this situation. Other measures that  
36  
37 may help reduce the workload include the involvement of senior medical staff early in  
38  
39 the admission process in managing complex medical problems. This is already  
40  
41 occurring in some wards, with Consultant Geriatricians seeing elderly orthopaedic  
42  
43 patients with hip fractures soon after admission. Certainly there is consensus regarding  
44  
45 the benefits resulting from the routine involvement of an elderly care physician in such  
46  
47 circumstances.<sup>(25)</sup> Many studies have shown shorter hospital stays, reduced mortality,  
48  
49 improved placement on discharge although there is conflicting evidence regarding cost-  
50  
51 savings.<sup>(25)</sup> While this approach may indeed benefit hospitals and orthogeriatric  
52  
53 patients, it may result in further clinical deskilling of junior doctors.  
54  
55  
56  
57  
58  
59  
60

1  
2  
3  
4  
5  
6 Surgical admission notes contained less examination of the relevant system pertaining  
7  
8 to the presenting complaint compared to medical admission notes. This was especially  
9  
10 true in the 2010s year group. In the authors' opinion, this could be again due to the  
11  
12 surgical admission process, whereby the surgical registrar assesses the patient (and  
13  
14 presumably examines the relevant system) but doesn't actually complete a full  
15  
16 admission note, which is then completed by the surgical house officer. Anecdotal  
17  
18 experience shows that in recent years, junior staff completing the admission note often  
19  
20 don't feel it is necessary to repeat the examination of the relevant system, especially as  
21  
22 further examination of a tender abdomen or fractured limb can cause discomfort. This  
23  
24 is borne out by the subgroup analysis finding showing that in the 2010s year group the  
25  
26 registrars documented RelSystem in 97% of admissions, compared to 65% of house  
27  
28 surgeons.  
29  
30  
31  
32  
33  
34  
35

36 There were several limitations to our study. These include its retrospective nature, the  
37  
38 use of the "surrogate" marker of the medical record to reflect clinical examination  
39  
40 skills, and the confusing admission process, whereby doctors will see a patient but not  
41  
42 necessarily "admit" them. In addition, database restrictions in the medical records  
43  
44 department meant we were only able to request medical admission files from 1998  
45  
46 onwards. The study could have had greater impact if we were able to access large  
47  
48 numbers of records from much earlier. We were able to obtain some earlier admission  
49  
50 notes, when these were co-filed with more contemporary records, although these were  
51  
52 not randomly selected. However these earlier notes were at least 10 years apart from  
53  
54  
55  
56  
57  
58  
59  
60

1  
2  
3 the other records, and statistical analysis showed no difference in patient age across the  
4  
5 year groups.  
6  
7  
8  
9

10  
11 This is the second study from Wellington Hospital that has identified the declining  
12  
13 quality of the hospital admission note with regard to physical examination. A previous  
14  
15 Wellington study concluded that there has been a decline in the quality of the surgical  
16  
17 house surgeon admission note (SHSurgAdN) when comparing 2005 and 2009.<sup>(24)</sup> The  
18  
19 authors found that the SHSurgAdN was comparatively deficient in the documentation of  
20  
21 the relevant system examination and the cardio-respiratory examination, and that this  
22  
23 deficiency had worsened over the intervening 4 years.<sup>(24)</sup> This study faced similar  
24  
25 limitations as the current study, ie it was retrospective, the admission note was used as a  
26  
27 surrogate for the assessment of the junior doctors physical examination skills, and the  
28  
29 admission process is complicated. However it was well designed and had good power,  
30  
31 with 100 admission notes audited in total. This study differed from the current study in  
32  
33 that it incorporated a house surgeon questionnaire, with questions on history taking as  
34  
35 well as clinical examination. The current study involves the investigation of an even  
36  
37 greater number of admissions over a longer time period, with more extracted data.  
38  
39  
40  
41  
42

43 There are potential solutions to halt this decline in physical examination skills. Some  
44  
45 local barriers to clinical competence have been identified and ways to improve this  
46  
47 deficit have been suggested.<sup>(7, 24)</sup> These include increased senior supervision of the  
48  
49 admitting process including formative feedback and reflection.<sup>(24)</sup> A local cultural  
50  
51 change could be implemented, enabling house surgeons to assess patients initially while  
52  
53 more senior staff provide supervision and guidance.<sup>(24)</sup> This would require increased  
54  
55 junior staffing or work-based changes to address workload issues, as well as  
56  
57  
58  
59  
60

1  
2  
3 commitment from senior colleagues to ensure that there is no compromise to patient  
4 safety. Finally, international evidence suggests that improved undergraduate curriculum  
5 especially bedside teaching and enhanced supervision of new doctors could redirect the  
6 current downward trend in physical examination. (6, 8, 10, 11)  
7  
8  
9  
10  
11  
12  
13

14  
15 During the audit process in this study, there was also significant variation in the history  
16 component of the admission note. The history is a vital part of the admission process,  
17 and is crucial to diagnostic success. (26, 27) Further research is warranted regarding the  
18 adequacy of history taking as evidenced by the admission record, and this concern is  
19 supported by contemporary studies. (24)  
20  
21  
22  
23  
24  
25  
26  
27  
28  
29  
30  
31  
32  
33  
34  
35  
36  
37  
38  
39  
40  
41  
42  
43  
44  
45  
46  
47  
48  
49  
50  
51  
52  
53  
54

55 **Competing interest statement** : All authors have completed the Unified  
56 Competing Interest form at [http://www.icmje.org/coi\\_disclosure.pdf](http://www.icmje.org/coi_disclosure.pdf) (available  
57  
58  
59  
60

1  
2  
3 on request from the corresponding author) and declare: no support from any  
4  
5 organisation for the submitted work; no financial relationships with any  
6  
7 organisations that might have an interest in the submitted work in the previous  
8  
9 three years, no other relationships or activities that could appear to have  
10  
11 influenced the submitted work.  
12  
13

14  
15  
16 **Exclusive license statement :** The Corresponding Author has the right to grant  
17  
18 on behalf of all authors and does grant on behalf of all authors, a non exclusive  
19  
20 licence on a worldwide basis to the BMJ Publishing Group Ltd and its Licensees  
21  
22 to permit this article (if accepted) to be published in BMJ editions and any other  
23  
24 BMJPGJL products and sublicences to exploit all subsidiary rights, as set out in  
25  
26 our licence.  
27  
28

- 29  
30  
31  
32  
33
- 34 • **Authorship and Contributorship statement:** The authors listed have made  
35  
36 significant contributions to this paper. First author Ms Oliver was involved in  
37  
38 the extraction and processing of data, data analysis and interpretation, literature  
39  
40 search, discussion points and initial draft formation. Second and corresponding  
41  
42 author Dr Hunter is not only involved in an administrative and communication  
43  
44 capacity but has contributed significantly with respect to study design, data  
45  
46 extraction and analysis, interpretation and statistical analysis, literature search,  
47  
48 and final paper revisions. Third author Dr Takayoshi is responsible for the  
49  
50 statistical analysis and figures. Last author Associate Professor Galletly  
51  
52 designed the study and was involved in the interpretation of the data and critical  
53  
54 review of the publication.  
55  
56  
57  
58  
59  
60

1  
2  
3  
4  
5  
6 **Acknowledgements:** The original project was funded by the Research Office  
7  
8 in the University of Otago Wellington. The authors would like to thank  
9  
10 Professor Michael Harrison for his advice and help in revision of the paper.  
11  
12

13 **Data sharing:** No additional unpublished data  
14  
15  
16  
17  
18  
19  
20  
21  
22  
23  
24  
25  
26  
27  
28  
29  
30  
31  
32  
33  
34  
35  
36  
37  
38  
39  
40  
41  
42  
43  
44  
45  
46  
47  
48  
49  
50  
51  
52  
53  
54  
55  
56  
57  
58  
59  
60

## References

1. Li J. Clinical skills in the 21st century. *Archives of Internal Medicine*. 1994;154(1):22.
2. Kern DC, Parrinog TA, Korst DR. The lasting value of clinical skills. *Journal of the American Medical Association*. 1985;254(1):70.
3. Lembo NJ, Dell'Italia LJ, Crawford MH, O'Rourke RA. Bedside diagnosis of systolic murmurs. *New England Journal of Medicine*. 1988;318(24):1572-8.
4. Reilly B. Physical examination in the care of medical inpatients: an observational study. *The Lancet*. 2003;362(9390):1100-5.
5. Shaver JA. Cardiac auscultation: a cost-effective diagnostic skill. *Current problems in cardiology*. 1995;20(7):441.
6. Chan-Yan C, Gillies JH, Ruedy J, Marshall SA. Clinical skills of medical residents: a review of physical examination. *Canadian Medical Association Journal*. 1988;139(7):629.
7. Sheehan D, Wilkinson TJ, Billett S. Interns' participation and learning in clinical environments in a New Zealand hospital. *Acad Med*. 2005 Mar;80(3):302-8.
8. Mangione S, Peitzman S. Physical diagnosis in the 1990s. Art or artifact? *Journal of general internal medicine*. 1996;11(8):490-3.
9. Tavel M. Cardiac Auscultation: A Glorious Past - But Does It Have a Future? *Circulation*. 1996;93(6):1250-3.
10. LaCombe MA. On bedside teaching. *Annals of Internal Medicine*. 1997;126(3):217.
11. Crumlish CM, Yialamas MA, McMahon GT. Quantification of bedside teaching by an academic hospitalist group. *Journal of Hospital Medicine*. 2009;4(5):304-7.



- 1  
2  
3 12. Williams KN, Ramani S, Fraser B, Orlander JD. Improving bedside teaching:  
4 findings from a focus group of study learners. *Academic Medicine*. 2008;83(3):257.  
5  
6  
7 13. Cole's Medical Practice in New Zealand. Wellington Medical Council of New  
8 Zealand. 2011.  
9  
10  
11 14. Baker MD, Schoenfeld PS. Documentation in the pediatric emergency  
12 department: A review of resuscitation cases. *Annals of Emergency Medicine*.  
13 1991;20(6):641-3.  
14  
15  
16 15. Cox JL, Zitner D, Courtney KD, MacDonald DL, Paterson G, Cochrane B.  
17 Undocumented patient information: an impediment to quality of care. *American Journal*  
18 *of Medicine*. 2003;114(3):211-6.  
19  
20  
21 16. Dunlay SMMD, Alexander KPMD, Melloni CMD, Kraschnewski JLMD, Liang  
22 LP, Gibler WBMD. Medical Records and Quality of Care in Acute Coronary  
23 Syndromes: Results from CRUSADE. *Archives of Internal Medicine*.  
24 2008;168(15):1692-8.  
25  
26  
27 17. Hicks TA, Gentleman CA. Improving physician documentation through a  
28 clinical documentation management program. *Nursing Administration Quarterly*.  
29 2003;27(4):285.  
30  
31  
32 18. Liesenfeld B, Heekeren H, Schade G, Hepp KD. Quality of documentation in  
33 medical reports of diabetic patients. *International Journal for Quality in Health Care*.  
34 1996;8(6):537-42.  
35  
36  
37 19. Miller JM, Velanovich V. The natural language of the surgeon's clinical note in  
38 outcomes assessment: a qualitative analysis of the medical record. *American Journal of*  
39 *Surgery*. 2010;199(6):817-22.  
40  
41  
42  
43  
44  
45  
46  
47  
48  
49  
50  
51  
52  
53  
54  
55  
56  
57  
58  
59  
60

- 1  
2  
3 20. Denny JC, Miller RA, Johnson KB, Spickard A, 3rd. Development and  
4 evaluation of a clinical note section header terminology [Evaluation Studies Research  
5 Support, U.S. Gov't, P.H.S.]. AMIA Annual Symposium proceedings. 2008:156-60.  
6  
7  
8  
9  
10 21. Tinsley JA. An educational intervention to improve residents' inpatient charting.  
11 Academic Psychiatry. 2004  
12  
13  
14 ;28(2):136-9.  
15  
16  
17 22. Smith JJ, Bland SA, Mullett S. Temperature - the forgotten vital sign  
18 [Evaluation studies]. Accident and Emergency Nursing 2005;13(4):247-50.  
19  
20  
21 23. Kanegaye JT, Cheng JC, McCaslin RI, Trocinski D, Silva PD. Improved  
22 documentation of wound care with a structured encounter form in the pediatric  
23 emergency department [Evaluation Studies]. Ambulatory Pediatrics. 2005;5(4):253-7.  
24  
25  
26  
27 24. Morgan TG, Dennet ER. Quality of House Surgeon Acute Surgical Admissions,  
28 2005 vs 2009. 2010.  
29  
30  
31  
32 25. Khan R, Fernandez C, Kashig F, Shedden R, Diggory P. Combined  
33 orthogeriatric care in the management of hip fractures: a prospective study. Annals of  
34 the Royal College of Surgeons of England. 2002;84:122-4.  
35  
36  
37  
38 26. Peterson MC, Holbrook JH, Hales D. Contributions of the History, Physical  
39 Examination and Laboratory Investigation in Making Medical Diagnoses. . British  
40 Medical Journal. 1992;156:163-5.  
41  
42  
43  
44  
45 27. Hampton JR, M.J.G H, J.R.A. M. Relative contributions of history-taking,  
46 physical examination, and laboratory investigation to diagnosis and management of  
47 medical outpatients. . British Medical Journal. 1975;2(486-489).  
48  
49  
50  
51  
52 28. Cretikos MA, Bellomo R, Hillman K, Chen J, Finfer S, Flabouris A. Respiratory  
53 rate: the neglected vital sign. Medical Journal of Australia. 2008;188(11):657.  
54  
55  
56  
57  
58  
59  
60

- 1  
2  
3 29. Fred HL. Hyposkillia: deficiency of clinical skills. *Tex Heart Inst J*. [Editorial].  
4  
5 2005;32(3):255-7.  
6  
7 30. JA T. An educational intervention to improve residents' inpatient charting. .  
8  
9 *Academic Psychiatry*. 2004;28(2):136-9.  
10  
11 31. Johnson JE, Carpenter JL. Medical house staff performance in physical  
12  
13 examination. *Archives of Internal Medicine*. 1986;146(5):937.  
14  
15 32. Solomon DH, Schaffer JL, Katz JN, Horsky J, Burdick E, Nadler E. Can history  
16  
17 and physical examination be used as markers of quality? An analysis of the initial visit  
18  
19 note in musculoskeletal care. . *Medical Care*. 2000;38(4):383-91.  
20  
21  
22  
23  
24  
25  
26  
27  
28  
29  
30  
31  
32  
33  
34  
35  
36  
37  
38  
39  
40  
41  
42  
43  
44  
45  
46  
47  
48  
49  
50  
51  
52  
53  
54  
55  
56  
57  
58  
59  
60



**Junior doctor skill in the art of physical examination: A retrospective study of the medical admission note over four decades**

|                                 |                                                                                                                                                |
|---------------------------------|------------------------------------------------------------------------------------------------------------------------------------------------|
| Journal:                        | <i>BMJ Open</i>                                                                                                                                |
| Manuscript ID:                  | bmjopen-2012-002257.R1                                                                                                                         |
| Article Type:                   | Research                                                                                                                                       |
| Date Submitted by the Author:   | 30-Jan-2013                                                                                                                                    |
| Complete List of Authors:       | Hunter, Selena; University of Otago, Wellington., Dept of Surgery and Anaesthesia<br>Oliver, Charlotte<br>Ikeda, Takayoshi<br>Galletly, Duncan |
| <b>Primary Subject Heading</b>: | Medical education and training                                                                                                                 |
| Secondary Subject Heading:      | Surgery, General practice / Family practice                                                                                                    |
| Keywords:                       | MEDICAL EDUCATION & TRAINING, Medical students, SURGERY                                                                                        |
|                                 |                                                                                                                                                |

SCHOLARONE™  
Manuscripts

1  
2  
3  
4  
5 **Junior doctor skill in the art of physical examination: A retrospective**  
6 **study of the medical admission note over four decades**  
7  
8

9 Charlotte M. Oliver, medical undergraduate<sup>1</sup>, Selena A. Hunter, senior lecturer in  
10 clinical examination<sup>2</sup>, Takayoshi Ikeda, research fellow and biostatistician<sup>3</sup>, and Duncan  
11 C. Galletly, associate professor and head of department<sup>2</sup>  
12

13  
14  
15  
16  
17  
18 <sup>1</sup>School of Medicine and Health Sciences, University of Otago Wellington, PO Box  
19 7343 Wellington South Wellington 6242.  
20

21  
22  
23 <sup>2</sup>Department of Surgery and Anaesthesia, University of Otago, Wellington, 23A Mein  
24 St, Newtown, PO Box 7343, Wellington 6242, New Zealand.  
25  
26

27  
28 <sup>3</sup>Dean's Department, University of Otago, Wellington, New Zealand  
29  
30  
31  
32  
33  
34  
35  
36  
37  
38  
39  
40

41 Correspondence should be addressed to Dr Hunter, c/o Department of Surgery and  
42 Anaesthesia, University of Otago, Wellington, 23A Mein St, Newtown, PO Box 7343,  
43 Wellington 6242, New Zealand.  
44

45 Email: [selena.hunter@otago.ac.nz](mailto:selena.hunter@otago.ac.nz); Phone: 0116443855554; fax: 0116443895318; cell  
46 phone: 0116421390043  
47  
48  
49  
50  
51  
52  
53  
54  
55  
56  
57  
58  
59  
60

## **Abstract.**

**Objectives** To investigate the hypothesis that junior doctors' examination skills are deteriorating by assessing the medical admission note examination record.

**Design** Retrospective study of the admission record.

**Setting** Tertiary care hospital.

**Methods:** The admission records of 266 patients admitted to Wellington hospital between 1975 and 2011 were analysed, according to the total number of physical examination observations (PEO<sub>tot</sub>), examination of the relevant system pertaining to the presenting complaint (RelSystem), and the number of body systems examined (N<sub>systems</sub>). Subgroup analysis proceeded according to admission year, level of experience of the admitting doctor (registrar, house surgeon (HS) and trainee intern (TI)) and medical versus surgical admission notes. Further analysis investigated the trend over time in documentation with respect to cardiac murmurs, palpable liver, palpable spleen, carotid bruit, heart rate, fundoscopy, and apex beat location and character.

**Results:** PEO<sub>tot</sub> declined by 34% from 1975 to 2011. Surgical admission notes had 21% fewer observations than medical notes.

RelSystem occurred in 94% of admissions, with no decline over time. Medical notes documented this more frequently than surgical notes (98% and 86% respectively).

There were no differences between registrars and HS, except for the 2010s subgroup (97% and 65% respectively).

1  
2  
3 Nsystems declined over the study period. Medical admission notes documented more  
4  
5 body systems than surgical notes. There were no differences between registrars, house  
6  
7 surgeons and trainee interns.  
8  
9

10 Fewer examinations were performed for palpable liver, palpable spleen, cardiac murmur  
11  
12 and apex beat location and character over the study period. There was no temporal  
13  
14 change in the positive findings of these observations or heart rate rounding.  
15  
16

17  
18 **Conclusions:** There has been a decline in the admission record at Wellington hospital  
19  
20 between 1975 and 2011, implying a deterioration in local doctors' physical examination  
21  
22 skills. Measures to counter this trend are discussed.  
23  
24  
25  
26  
27  
28  
29  
30  
31  
32  
33  
34  
35  
36  
37  
38  
39  
40  
41  
42  
43  
44  
45  
46  
47  
48  
49  
50  
51  
52  
53  
54  
55  
56  
57  
58  
59  
60

## **Article Summary**

### **Article focus**

- There is well-documented international evidence supporting a declining standard in junior doctor physical examination skills in recent years.
- This study was conducted to address the research question that this deterioration has occurred locally in Wellington, New Zealand.

### **Key messages**

- There has been a decline in the quantity and quality of the medical admission note examination records in this tertiary care centre between 1975 and 2011, which implies a decline in the examination skills of local junior doctors.
- Measures to address this decay in clinical ability include improved undergraduate curriculum, greater supervision of junior doctors, greater involvement of junior doctors in the admission process and increased staffing levels.

### **Strengths and limitations of this study**

- This is a significant study involving large numbers of patient admission records over a substantial period of time (358 patient records over four decades) with a multitude of statistically robust outcome measures analysed.
- Our study is limited due to its retrospective nature, single-centre study, the use of the “surrogate” marker of the written medical record to reflect clinical examination skills, and the confusing admission process, whereby doctors will see a patient but not necessarily “admit” them. In addition, the data was extracted by only one researcher.



## Introduction.

Thoughtful history taking and physical examination are recognised as fundamental to the practice of medicine.<sup>(1)</sup> Moreover, physicians rate physical examination as their most valuable skill.<sup>(2)</sup> It has also been shown that despite the current technology, physical examination remains important due to its diagnostic contribution,<sup>(3)</sup> positive effect on patient care<sup>(4)</sup> and cost reduction.<sup>(5)</sup>

There has been a well recognised international decline in the physical examination skills of doctors. Potential reasons for this deterioration include busy clinical workloads and lack of clinical teaching.<sup>(6,7)</sup> However it is generally recognised that the most important influence has been the increased availability of specialised diagnostic equipment.<sup>(8,9)</sup> Imaging technology such as ultrasound, CT and MRI have overshadowed the use of physical examination for diagnostic information.<sup>(8,9)</sup>

Although adding enormously to the cost of health care, these investigations are seen to be more accurate and less liable to litigation, than the more subjective art of physical examination.<sup>(8,9)</sup> It has been argued that the overuse of this technology has also helped to erode the teaching and skill in physical diagnosis<sup>(8,10)</sup> and that it may be undermining the value of these skills.<sup>(4)</sup> This is further impacted by the shift away from bedside teaching and supervision of physical examination skills during undergraduate years and early years of practice.<sup>(6,10,11)</sup> In the United States bedside teaching has fallen from 75% of clinical teaching in the 1960s<sup>(10)</sup> to 8-19% of clinical teaching in 2008.<sup>(12)</sup> Thus there are significant changes required from both the medical school and

1  
2  
3 hospital culture regarding physical examination skill acquisition, improvement and  
4  
5 retention.  
6  
7  
8  
9

10  
11 The medical record is a tool for communication between multiple health professionals,  
12 facilitating continuity of care and good patient management.<sup>(13)</sup> There have been a  
13 number of studies referencing the importance of the quality of the medical record.<sup>(14-19)</sup>  
14  
15 The medical record is also a legal document and as such deserves the appropriate time  
16 and attention to ensure it is “comprehensive and accurate”.<sup>(13)</sup> Some studies have  
17 looked into ways to improve documentation such as introducing a clinical note header  
18 section,<sup>(20)</sup> education and instruction<sup>(21,22)</sup> and structured encounter forms<sup>(23)</sup> with  
19 positive results. There are currently no evidence based standards for best practice  
20 concerning adequacy of documentation of physical examination findings for Wellington  
21 Hospital, neither are there any clinical guidelines derived from expert opinion. Thus it  
22 is difficult to ascertain the expected minimum level of documentation. In order to  
23 retrospectively investigate examination practice over time we are reliant on this medical  
24 record for our information. The current study is inevitably an investigation into both the  
25 skills of doctors and their documentation practices, although our primary hypothesis is  
26 whether or not there has been a decline in the standards of junior doctors physical  
27 examination skills.  
28  
29  
30  
31  
32  
33  
34  
35  
36  
37  
38  
39  
40  
41  
42  
43  
44  
45  
46  
47  
48  
49

## 50 **Methods**

51  
52  
53 This retrospective study looked at admission records from patients admitted to Capital  
54 and Coast District Health Board (Wellington and Kenepuru Hospitals) between 1975  
55  
56  
57  
58  
59  
60

1  
2  
3 and 2010. The records were randomly selected by National Health Index (NHI) number  
4  
5 if the patient had been admitted during this time with certain medical diagnoses, as  
6  
7 reflected by the “coding diagnosis” which enables clerical staff to enter the correct  
8  
9 computer information about each admission. 1998 was the earliest year for which we  
10  
11 could get a random NHI list generated. In this way we obtained 300 sets of patient  
12  
13 admission records, 100 from 1998, 100 from 2000 and 100 from 2010, from the medical  
14  
15 records department at Wellington Hospital. Out of each set of 100 records there were 50  
16  
17 general medical and 50 surgical admissions. The medical coding diagnoses were  
18  
19 pneumonia, congestive heart failure, shortness of breath or chest pain. The surgical  
20  
21 coding diagnoses were inguinal hernia, appendicitis, abdominal pain, fractured neck of  
22  
23 femur or bowel obstruction. Many of these medical files included records from previous  
24  
25 admissions to hospital. We included these older admission notes if they had been coded  
26  
27 with the aforementioned diagnoses, and if there was at least 10 years temporal  
28  
29 separation from the randomly selected admission and we used only one older admission  
30  
31 per patient. Strict patient and staff confidentiality was maintained at all times.  
32  
33  
34  
35  
36  
37  
38  
39

40 The admission note from each record was examined and the relevant data was extracted  
41  
42 by one researcher, the primary author, with verification and close supervision by two  
43  
44 other researchers (the corresponding and final authors). This data was entered into a  
45  
46 pre-developed spreadsheet. If there was no admission note, we examined the last  
47  
48 documented examination in the emergency department before ward admission. This  
49  
50 was generally performed by the registrar of the admitting ward. The data from this  
51  
52 examination was then entered as stated previously.  
53  
54  
55  
56  
57  
58  
59  
60

1  
2  
3 We recorded the total number of physical examination observations (PEO<sub>tot</sub>) that were  
4 documented per admission. We also documented the number of major body systems  
5 that had been examined (NS<sub>ystems</sub>). These were defined as the cardiovascular,  
6 gastrointestinal, respiratory and central nervous systems. We then noted whether the  
7 relevant system pertaining to the presenting complaint had been examined (Rel<sub>System</sub>).  
8  
9 We then analysed the data in terms of year groups, in order to look for temporal change.  
10  
11  
12  
13  
14  
15  
16  
17  
18  
19

20 We subsequently analysed the data according to whether it was a medical or surgical  
21 admission note, and the level of experience of the admitting doctor (registrars, house  
22 surgeons (HS) or trainee interns (TI)) with respect to PEO<sub>tot</sub>, NS<sub>ystems</sub> and Rel<sub>System</sub>.  
23  
24 We also performed year group analysis on these subgroups.  
25  
26  
27  
28  
29  
30  
31  
32

33 We also investigated whether there was documentation of particular examination  
34 observations, positive or negative. These were palpable liver, palpable spleen, carotid  
35 bruit, cardiac murmur, apex beat location and character and fundoscopy. We analysed  
36 whether the frequency of these documented observations changed over time. Of the  
37 admission notes documenting the performance of these examinations, we then examined  
38 the frequency of positive findings and any change over time.  
39  
40  
41  
42  
43  
44  
45  
46  
47  
48  
49

50 Finally we investigated the documentation of heart rate. Of those admission notes with  
51 a heart rate value, we analysed the frequency with which the heart rate was given as a  
52 value perfectly divisible by five, suggesting a tendency of the admitting doctor toward  
53  
54  
55  
56  
57  
58  
59  
60

1  
2  
3 rounding the actual value and thus potential inaccuracy. We then examined for a  
4  
5 change in this trend over time.  
6  
7  
8  
9

## 10 11 **Results.**

12  
13  
14 We examined 358 patient admission records, from 266 patients admitted to Capital and  
15  
16 Coast District Health Board (Wellington and Kenepuru Hospitals) between 1975 and  
17  
18 2010. For administrative reasons we were unable to obtain 34 of the ordered sets of  
19  
20 notes. There was no statistically significant difference in the patients' age between the  
21  
22 year groups, after Kruskal-Wallis analysis. A biostatistician performed all analyses.  
23  
24  
25  
26  
27  
28

29  
30 As evidenced by the documentation in the hospital record admission notes, there has  
31  
32 been a statistically significant decrease (34%) in the total number of physical  
33  
34 examination observations per admission (PEOtot) from 1975 to 2011 ( $p < 0.001$ ).  
35  
36 (Figure 1).  
37  
38  
39  
40  
41  
42  
43  
44  
45  
46  
47  
48  
49  
50  
51  
52  
53  
54  
55  
56  
57  
58  
59  
60

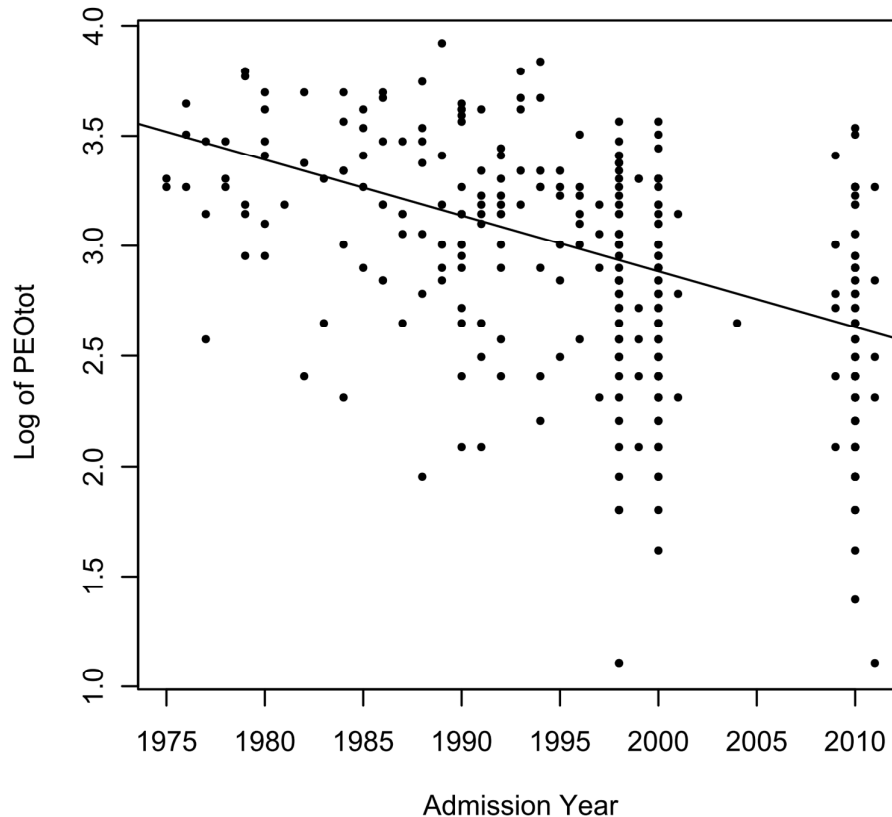

Figure 1: Total number of physical examination observations per admission (PEOtot) versus time.

There were significantly fewer (21%) total observations in surgical admission notes, compared to medical admission notes ( $p < 0.001$ ). Registrars recorded 12% fewer total observations compared to house surgeons ( $p < 0.001$ ). Statistical significance with respect to admission year group, specialty and level of experience of the admitting doctor in terms of predicting PEOtot was achieved by using the Wald  $\chi^2$  test. PEOtot was analysed as a negative binomial regression model (overdispersed data) by rendering the 'admission year' as a continuous variable and the 'admission ward' and 'doctor level of experience' as categorical variables.

1  
2  
3 With respect to the examination of the relevant system pertaining to the presenting  
4 complaint (RelSystem), we have found that this occurred in 94% of all admission notes  
5 (95% C.I.) and there was no statistically significant change over time ( $p < 0.1$ ). There  
6  
7 was however a significant difference according to specialty, with surgical doctors less  
8  
9 likely to have examined RelSystem compared to their medical counterparts (86% vs  
10  
11 98% respectively,  $p < 0.001$ ). Further subanalysis of specialty and RelSystem with  
12  
13 respect to year group showed no statistically significant differences except for the  
14  
15 2010s, in which 25% of surgical admissions did not record examination of the relevant  
16  
17 system compared with 3% of medical admissions ( $p < 0.05$ ); (pre 1990s ( $p > 0.05$ ), 1990s  
18  
19 ( $p < 0.1$ ) 2000s ( $p < 0.1$ )).

20  
21  
22  
23  
24  
25  
26 There was no statistically significant difference overall between examination of the  
27  
28 relevant system pertaining to their presenting complaint (RelSystem) with respect to  
29  
30 level of experience of admitting doctor (registrar, house surgeon and trainee intern)  
31  
32 ( $p < 0.01$ ). Further analysis by year groups shows a difference only for the 2010s, in  
33  
34 which registrars documented RelSystem in 97% of admissions compared to 65% of  
35  
36 house surgeons ( $p < 0.005$ ).

37  
38  
39  
40  
41  
42  
43 The total number of body systems examined (Nsystems) significantly declined over the  
44  
45 study period, with a change of 1.184 mean body systems ( $p < 0.001$ ). (Figure 2).  
46  
47  
48  
49  
50  
51  
52  
53  
54  
55  
56  
57  
58  
59  
60

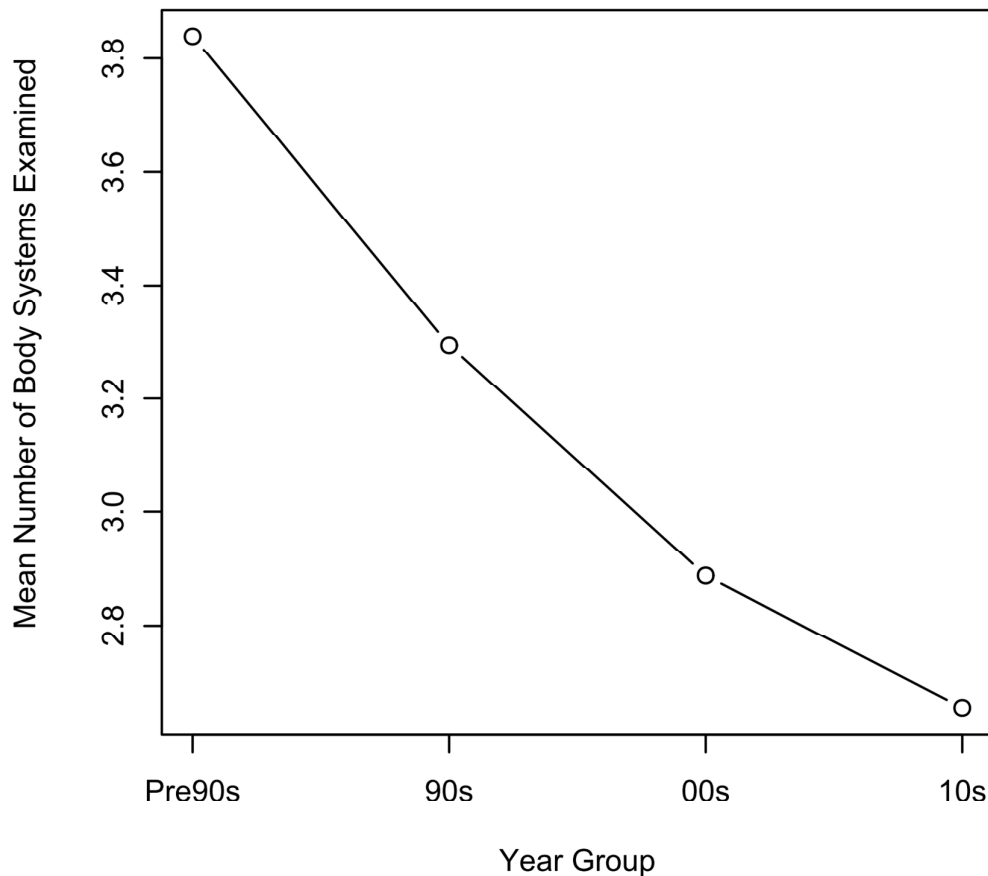

Figure 2: Mean number of body systems examined per year group.

The most commonly omitted body system was the central nervous system, across all the year groups.

There was a significant difference according to specialty between medical and surgical admissions, with surgical doctors examining less Nsystems than physicians ( $p < 0.01$ ).

There were no significant differences between specialty within each of the year groups ( $p < 0.1$ ). With respect to the level of experience of the admitting doctor, there were no significant differences in Nsystems ( $p > 0.5$ ) or within year groups ( $p < 0.1$ ).



There was a significant decline over the study period in the percentage of admission notes with recorded examinations for palpable liver, palpable spleen, cardiac murmur and apex beat location and character ( $\chi^2 = 51.3, 47.8, 32.0, \text{ and } 57.9$ , respectively,  $df = 1, p < 0.001$ ). Statistical analysis was performed by Cochran-Armitage testing, and 95% confidence intervals were used. There was no significant change in the frequency of recorded examinations for carotid bruits ( $\chi^2 = 0.4, df = 1, p > 0.5$ ). There was no year group analysis performed for fundoscopy, as this was only documented in the pre 90s year group. (Figure 3a)

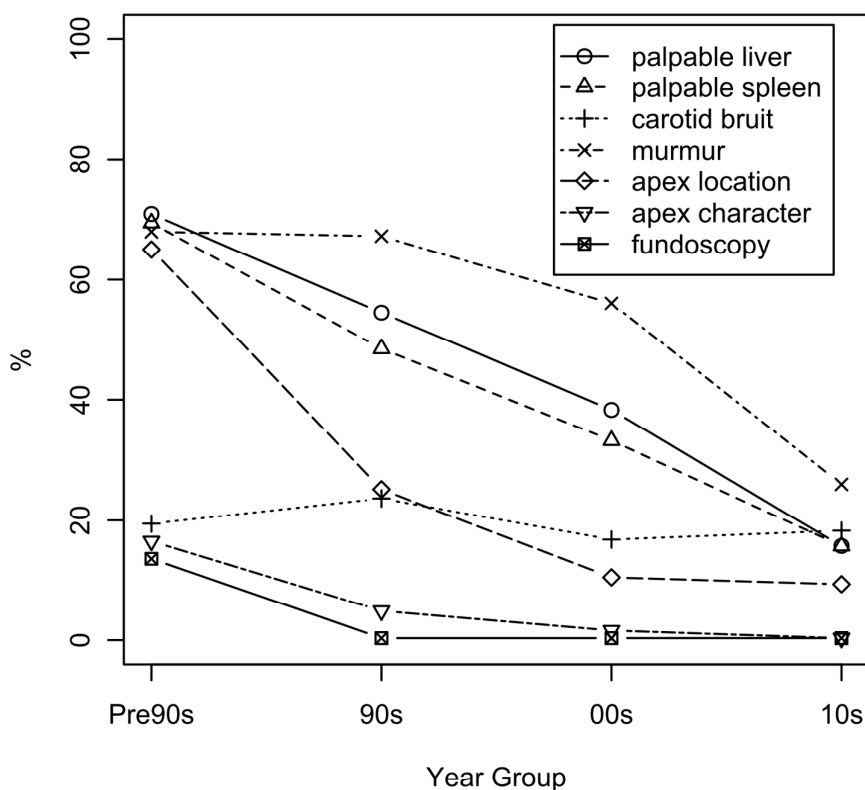

Figure 3a: Percentage of admission notes with recorded examinations for palpable liver, palpable spleen, carotid bruit, murmur, apex location, apex character and fundoscopy versus year group.

There were no changes over time with respect to positive cardiac murmur, palpable liver, palpable spleen, carotid bruit, and apex beat location and character ( $\chi^2 = 0.01$ ,  $df = 1$ ,  $p > 0.5$  for cardiac murmur;  $\chi^2 = 1.5, 1.8, 1.7, 0.2,$  and  $0.5$  respectively,  $df = 1$ ,  $p > 0.5$  for the rest). This is probably due to the low frequency of positive findings within each of the year groups. Statistical analysis was performed by Cochran-Armitage testing, and 95% confidence intervals were used. (Figure 3b).

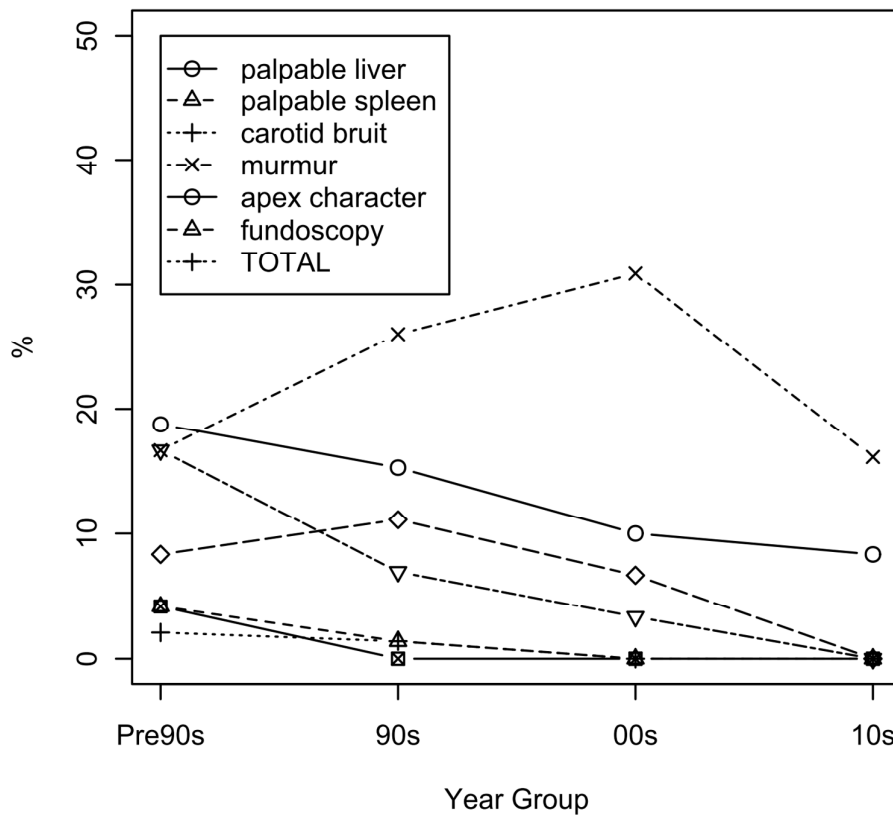

Figure 3b: Percentage of admission notes with positive findings for palpable liver, palpable spleen, carotid bruit, murmur, apex location, apex character and fundoscopy versus year group.

We found that the vast majority of admission notes documented heart rate, with approximately 50% in each year group documenting a heart rate divisible by five and no change over time with respect to the latter ( $\chi^2 = 0.8$ ,  $df = 1$ ,  $p > 0.5$ ). Statistical analysis was provided by Cochran-Armitage testing, and 95% confidence intervals were used.

## **Discussion**

Our results imply that there has been deterioration in the physical examination skills of junior doctors in Wellington Hospital from 1975 to 2010, after detailed analysis of the medical admission record notes. This is evident from the observed decline in the recorded total number of physical examination observations, total number of body systems examined and the number of recorded observations for palpable liver, palpable spleen, cardiac murmur and apex beat location and character. In the author's opinion, this temporal deterioration could be due to the increased use and availability of complex diagnostic technology<sup>(8,9)</sup> as well as the concurrent loss of confidence in physical examination skills. Busy workloads may necessitate substandard physical examinations and the resulting documentation. Low examination skill proficiency after initial training, and little opportunity to improve these skills<sup>(6,7)</sup> and the resultant effect on student and teacher confidence further contribute to the demise of clinical examination. Recent anecdotal comments from undergraduate students attached to surgical wards at Wellington Hospital suggest that junior staff transmit a negative view toward the value of physical examination skills, thus creating a 'cyclic' phenomenon of further medical deskilling with each year of medical graduates.

Interestingly there has been no general decline in the examination of the relevant system pertaining to their presenting complaint (RelSystem). It could be argued that the latter

1  
2  
3 constitutes the 'bare minimum', and hence has suffered less than the other parts of the  
4  
5 medical admission record.  
6  
7  
8  
9

10  
11 We found that registrars recorded 12% fewer total observations than house surgeons. In  
12  
13 the authors' opinion, this could be a reflection of the local admission process, for both  
14  
15 medical and surgical patients. For many years, it has been the convention in Wellington  
16  
17 that registrars assess and diagnose the patient before instigating appropriate initial  
18  
19 therapy. Then the team house surgeon is called to finish the 'clerking' process – ie  
20  
21 complete the history and examination of the admission, chart the patients medications  
22  
23 and fluids etc. This is also the case for elective patients undergoing the preassessment  
24  
25 process before their scheduled surgery, where the initial documentation of the patients  
26  
27 medical problems is performed by an anaesthetist before the house surgeon interviews  
28  
29 the patient. This may not reflect practice in all New Zealand or international hospitals.  
30  
31  
32  
33  
34  
35  
36

37 It remains unclear why surgical admission notes contain less total observations and  
38  
39 number of body systems than their medical counterparts. In the authors' opinion,  
40  
41 physicians may arguably take a more holistic approach to their patients, and are hence  
42  
43 more likely to examine more body systems and document a greater number of  
44  
45 examination findings. The differential diagnoses of medical complaints may be broader  
46  
47 than surgical complaints, warranting such a detailed assessment. Junior surgical staff  
48  
49 are frequently time pressured as they are often on call for acute assessments, as well as  
50  
51 being expected to be in the operating theatre. Surgical house officers are the only staff  
52  
53 available to deal with the often complex medical issues in the surgical ward. If this time  
54  
55 pressure is indeed a true factor in the declining standards of the surgical admission note,  
56  
57  
58  
59  
60

1  
2  
3 greater surgical staffing resources could ameliorate this situation. Other measures that  
4  
5 may help reduce the workload include the involvement of senior medical staff early in  
6  
7 the admission process in managing complex medical problems. This is already  
8  
9 occurring in some wards, with Consultant Geriatricians seeing elderly orthopaedic  
10  
11 patients with hip fractures soon after admission. Certainly there is consensus regarding  
12  
13 the benefits resulting from the routine involvement of an elderly care physician in such  
14  
15 circumstances.<sup>(24)</sup> Many studies have shown shorter hospital stays, reduced mortality,  
16  
17 improved placement on discharge although there is conflicting evidence regarding cost-  
18  
19 savings.<sup>(24)</sup> While this approach may indeed benefit hospitals and orthogeriatric  
20  
21 patients, it may result in further clinical deskilling of junior doctors.  
22  
23  
24  
25  
26  
27  
28

29 Surgical admission notes contained less examination of the relevant system pertaining  
30  
31 to the presenting complaint compared to medical admission notes. This was especially  
32  
33 true in the 2010s year group. In the authors' opinion, this could be again due to the  
34  
35 surgical admission process, whereby the surgical registrar assesses the patient (and  
36  
37 presumably examines the relevant system) but does not actually complete a full  
38  
39 admission note, which is then completed by the surgical house officer. Anecdotal  
40  
41 experience shows that in recent years, junior staff completing the admission note often  
42  
43 do not feel it is necessary to repeat the examination of the relevant system, especially as  
44  
45 further examination of a tender abdomen or fractured limb can cause discomfort. This  
46  
47 is borne out by the subgroup analysis finding showing that in the 2010s year group the  
48  
49 registrars documented RelSystem in 97% of admissions, compared to 65% of house  
50  
51 surgeons documented RelSystem in 97% of admissions, compared to 65% of house  
52  
53 surgeons.  
54  
55  
56  
57  
58  
59  
60

1  
2  
3 There were several limitations to our study. These include its retrospective nature, the  
4 use of the “surrogate” marker of the medical record to reflect clinical examination  
5 skills, and the confusing admission process, whereby doctors will see a patient but not  
6 necessarily “admit” them. In addition, database restrictions in the medical records  
7 department meant we were only able to request medical admission files from 1998  
8 onwards. The study could have had greater statistical impact if we were able to access  
9 large numbers of records from much earlier. We were able to obtain some earlier  
10 admission notes, when these were co-filed with more contemporary records, although  
11 these were not randomly selected. However these earlier notes were at least 10 years  
12 apart from the other records, there was only one older file per patient, and statistical  
13 analysis showed no difference in patient age across the year groups. This was single-  
14 centre study, hence further research is warranted at other national and international  
15 hospitals. Finally, our data was extracted by only one researcher, the first author,  
16 however this was closely supervised and verified by two other researchers.  
17  
18  
19  
20  
21  
22  
23  
24  
25  
26  
27  
28  
29  
30  
31  
32  
33  
34  
35  
36  
37

38 This is the second study from Wellington Hospital that has identified the declining  
39 quality of the hospital admission note with regard to physical examination. A previous  
40 Wellington study concluded that there has been a decline in the quality of the surgical  
41 house surgeon admission note (SHSurgAdN) when comparing 2005 and 2009 (Morgan  
42 TG, Dennet ER. Quality of House Surgeon Acute Surgical Admissions, 2005 vs 2009.  
43 (personal communication)). The authors found that the SHSurgAdN was comparatively  
44 deficient in the documentation of the relevant system examination and the cardio-  
45 respiratory examination, and that this deficiency had worsened over the intervening four  
46 years. This study faced similar limitations as the current study, ie it was single-centred,  
47 retrospective, the admission note was used as a surrogate for the assessment of the  
48  
49  
50  
51  
52  
53  
54  
55  
56  
57  
58  
59  
60

1  
2  
3 junior doctors physical examination skills, and the admission process is complicated.  
4  
5 However it was well designed and had good power, with 100 admission notes audited in  
6  
7 total. This study differed from the current study in that it incorporated a house surgeon  
8  
9 questionnaire, with questions on history taking as well as clinical examination. The  
10  
11 current study involves the investigation of an even greater number of admissions over a  
12  
13 longer time period, with more extracted data.  
14  
15  
16  
17  
18  
19

20 There are potential solutions to halt this decline in physical examination skills. Some  
21  
22 local barriers to clinical competence have been identified and ways to improve this  
23  
24 deficit have been suggested.<sup>(7)</sup> In the authors' opinion, these could include increased  
25  
26 senior supervision of the admitting process including formative feedback and reflection,  
27  
28 as well as a local cultural change enabling house surgeons to initially assess patients  
29  
30 while senior staff provide supervision and guidance. This would require increased  
31  
32 junior staffing or work-based changes to address workload issues, as well as  
33  
34 commitment from senior colleagues to ensure that there is no compromise to patient  
35  
36 safety. Finally, international evidence suggests that improved undergraduate curriculum  
37  
38 especially bedside teaching and enhanced supervision of new doctors could redirect the  
39  
40 current downward trend in physical examination.<sup>(6, 8, 10, 11)</sup>  
41  
42  
43  
44  
45  
46  
47

48 During the audit process in this study, there was also significant variation in the history  
49  
50 component of the admission note. The history is a vital part of the admission process,  
51  
52 and is crucial to diagnostic success.<sup>(25, 26)</sup> Further research is warranted regarding the  
53  
54 adequacy of history taking as evidenced by the admission record.  
55  
56  
57  
58  
59  
60

1  
2  
3  
4  
5  
6  
7  
8  
9  
10  
11  
12  
13  
14  
15  
16  
17  
18  
19  
20  
21  
22  
23  
24  
25  
26  
27 **Competing interest statement:** All authors have completed the Unified  
28  
29 Competing Interest form at [http://www.icmje.org/coi\\_disclosure.pdf](http://www.icmje.org/coi_disclosure.pdf) (available  
30  
31 on request from the corresponding author) and declare: no support from any  
32  
33 organisation for the submitted work; no financial relationships with any  
34  
35 organisations that might have an interest in the submitted work in the previous  
36  
37 three years, no other relationships or activities that could appear to have  
38  
39 influenced the submitted work.  
40  
41  
42  
43  
44

45 **Exclusive license statement:** The Corresponding Author has the right to grant  
46  
47 on behalf of all authors and does grant on behalf of all authors, a non exclusive  
48  
49 license on a worldwide basis to the BMJ Publishing Group Ltd and its Licensees  
50  
51 to permit this article (if accepted) to be published in BMJ editions and any other  
52  
53 BMJ PGL products and sublicenses to exploit all subsidiary rights, as set out in  
54  
55 our license.  
56  
57  
58  
59  
60



- 1  
2  
3  
4  
5  
6  
7  
8  
9  
10  
11  
12  
13  
14  
15  
16  
17  
18  
19  
20  
21  
22  
23  
24  
25  
26  
27  
28  
29  
30  
31  
32  
33  
34  
35  
36  
37  
38  
39  
40  
41  
42  
43  
44  
45  
46  
47  
48  
49  
50  
51  
52  
53  
54  
55  
56  
57  
58  
59  
60
- **Authorship and Contributorship statement:** The authors listed have made significant contributions to this paper. First author Ms. Oliver was involved in the extraction and processing of data, data analysis and interpretation, literature search, discussion points and initial draft formation. Second and corresponding author Dr Hunter is not only involved in an administrative and communication capacity but has contributed significantly with respect to study design, data extraction and analysis, interpretation and statistical analysis, literature search, and final paper revisions. Third author Dr Takayoshi is responsible for the statistical analysis and figures. Last author Associate Professor Galletly designed the study and was involved in the extraction of the data, interpretation of the data and critical review of the publication.

**Acknowledgements:** The original project was funded by the Research Office in the University of Otago Wellington. The authors would like to thank Professor Michael Harrison for his advice and help in revision of the paper.

## References

1. Li J. Clinical skills in the 21st century. *Archives of Internal Medicine*. 1994;154(1):22.
2. Kern DC, Parrinog TA, Korst DR. The lasting value of clinical skills. *Journal of the American Medical Association*. 1985;254(1):70.
3. Lembo NJ, Dell'Italia LJ, Crawford MH, O'Rourke RA. Bedside diagnosis of systolic murmurs. *New England Journal of Medicine*. 1988;318(24):1572-8.
4. Reilly B. Physical examination in the care of medical inpatients: an observational study. *The Lancet*. 2003;362(9390):1100-5.
5. Shaver JA. Cardiac auscultation: a cost-effective diagnostic skill. *Current problems in cardiology*. 1995;20(7):441.
6. Chan-Yan C, Gillies JH, Ruedy J, Marshall SA. Clinical skills of medical residents: a review of physical examination. *Canadian Medical Association Journal*. 1988;139(7):629.
7. Sheehan D, Wilkinson TJ, Billett S. Interns' participation and learning in clinical environments in a New Zealand hospital. *Acad Med*. 2005 Mar;80(3):302-8.
8. Mangione S, Peitzman S. Physical diagnosis in the 1990s. Art or artifact? *Journal of general internal medicine*. 1996;11(8):490-3.
9. Tavel M. Cardiac Auscultation: A Glorious Past - But Does It Have a Future? *Circulation*. 1996;93(6):1250-3.
10. LaCombe MA. On bedside teaching. *Annals of Internal Medicine*. 1997;126(3):217.
11. Crumlish CM, Yialamas MA, McMahon GT. Quantification of bedside teaching by an academic hospitalist group. *Journal of Hospital Medicine*. 2009;4(5):304-7.

- 1  
2  
3 12. Williams KN, Ramani S, Fraser B, Orlander JD. Improving bedside teaching:  
4  
5 findings from a focus group of study learners. *Academic Medicine*. 2008;83(3):257.  
6
- 7 13. Cole's Medical Practice in New Zealand. Wellington Medical Council of New  
8  
9 Zealand. 2011.  
10
- 11 14. Baker MD, Schoenfeld PS. Documentation in the pediatric emergency  
12  
13 department: A review of resuscitation cases. *Annals of Emergency Medicine*.  
14  
15 1991;20(6):641-3.  
16
- 17 15. Cox JL, Zitner D, Courtney KD, MacDonald DL, Paterson G, Cochrane B.  
18  
19 Undocumented patient information: an impediment to quality of care. *American Journal*  
20  
21 *of Medicine*. 2003;114(3):211-6.  
22  
23
- 24 16. Dunlay SMMD, Alexander KPMD, Melloni CMD, Kraschnewski JLMD, Liang  
25  
26 LP, Gibler WBMD. Medical Records and Quality of Care in Acute Coronary  
27  
28 Syndromes: Results from CRUSADE. *Archives of Internal Medicine*.  
29  
30 2008;168(15):1692-8.  
31  
32
- 33 17. Hicks TA, Gentleman CA. Improving physician documentation through a  
34  
35 clinical documentation management program. *Nursing Administration Quarterly*.  
36  
37 2003;27(4):285.  
38  
39
- 40 18. Liesenfeld B, Heekeren H, Schade G, Hepp KD. Quality of documentation in  
41  
42 medical reports of diabetic patients. *International Journal for Quality in Health Care*.  
43  
44 1996;8(6):537-42.  
45  
46
- 47 19. Miller JM, Velanovich V. The natural language of the surgeon's clinical note in  
48  
49 outcomes assessment: a qualitative analysis of the medical record. *American Journal of*  
50  
51 *Surgery*. 2010;199(6):817-22.  
52  
53  
54  
55  
56  
57  
58  
59  
60

- 1  
2  
3  
4  
5  
6  
7  
8  
9  
10  
11  
12  
13  
14  
15  
16  
17  
18  
19  
20  
21  
22  
23  
24  
25  
26  
27  
28  
29  
30  
31  
32  
33  
34  
35  
36  
37  
38  
39  
40  
41  
42  
43  
44  
45  
46  
47  
48  
49  
50  
51  
52  
53  
54  
55  
56  
57  
58  
59  
60
20. Denny JC, Miller RA, Johnson KB, Spickard A, 3rd. Development and evaluation of a clinical note section header terminology [Evaluation Studies Research Support, U.S. Gov't, P.H.S.]. AMIA Annual Symposium proceedings. 2008:156-60.
21. Tinsley JA. An educational intervention to improve residents' inpatient charting. *Academic Psychiatry*. 2004  
;28(2):136-9.
22. Smith JJ, Bland SA, Mullett S. Temperature - the forgotten vital sign [Evaluation studies]. *Accident and Emergency Nursing* 2005;13(4):247-50.
23. Kanegaye JT, Cheng JC, McCaslin RI, Trocinski D, Silva PD. Improved documentation of wound care with a structured encounter form in the pediatric emergency department [Evaluation Studies]. *Ambulatory Pediatrics*. 2005;5(4):253-7.
24. Khan R, Fernandez C, Kashig F, Shedden R, Diggory P. Combined orthogeriatric care in the management of hip fractures: a prospective study. *Annals of the Royal College of Surgeons of England*. 2002;84:122-4.
25. Peterson MC, Holbrook JH, Hales D. Contributions of the History, Physical Examination and Laboratory Investigation in Making Medical Diagnoses. *British Medical Journal*. 1992;156:163-5.
26. Hampton JR, M.J.G H, J.R.A. M. Relative contributions of history-taking, physical examination, and laboratory investigation to diagnosis and management of medical outpatients. *British Medical Journal*. 1975;2(486-489).

1  
2  
3  
4  
5 **Junior doctor skill in the art of physical examination: A retrospective**  
6 **study of the medical admission note over four decades**  
7  
8

9 Charlotte M. Oliver, medical undergraduate<sup>1</sup>, Selena A. Hunter, senior lecturer in  
10 clinical examination<sup>2</sup>, Takayoshi Ikeda, research fellow and biostatistician<sup>3</sup>, and Duncan  
11 C. Galletly, associate professor and head of department<sup>2</sup>  
12

13  
14  
15  
16  
17  
18 <sup>1</sup>School of Medicine and Health Sciences, University of Otago Wellington, PO Box  
19 7343 Wellington South Wellington 6242.  
20

21  
22  
23 <sup>2</sup>Department of Surgery and Anaesthesia, University of Otago, Wellington, 23A Mein  
24 St, Newtown, PO Box 7343, Wellington 6242, New Zealand.  
25  
26

27  
28 <sup>3</sup>Dean's Department, University of Otago, Wellington, New Zealand  
29  
30  
31  
32  
33  
34  
35  
36  
37  
38  
39  
40

41 Correspondence should be addressed to Dr Hunter, c/o Department of Surgery and  
42 Anaesthesia, University of Otago, Wellington, 23A Mein St, Newtown, PO Box 7343,  
43 Wellington 6242, New Zealand.  
44

45 Email: [selena.hunter@otago.ac.nz](mailto:selena.hunter@otago.ac.nz); Phone: 0116443855554; fax: 0116443895318; cell  
46 phone: 0116421390043  
47  
48  
49  
50  
51  
52  
53  
54  
55  
56  
57  
58  
59  
60

## **Abstract.**

**Objectives** To investigate the hypothesis that junior doctors' examination skills are deteriorating by assessing the medical admission note examination record.

**Design** Retrospective study of the admission record.

**Setting** Tertiary care hospital.

**Methods:** The admission records of 266 patients admitted to Wellington hospital between 1975 and 2011 were analysed, according to the total number of [physical examination observations](#) (PEO<sub>tot</sub>), examination of the relevant system pertaining to the presenting complaint (RelSystem), and the number of body systems examined (N<sub>systems</sub>). Subgroup analysis proceeded according to admission year, level of experience of the admitting doctor (registrar, house surgeon (HS) and trainee intern (TI)) and medical versus surgical admission notes. Further analysis investigated the trend over time in documentation with respect to cardiac murmurs, palpable liver, palpable spleen, carotid bruit, heart rate, fundoscopy, and apex beat location and character.

**Results:** PEO<sub>tot</sub> declined by 34% from 1975 to 2011. Surgical admission notes had 21% fewer observations than medical notes.

RelSystem occurred in [94%](#) of admissions, with no decline over time. Medical notes documented this more frequently than surgical notes ([98%](#) and [86%](#) respectively).

There were no differences between registrars and HS, except for the 2010s subgroup ([97%](#) and [65%](#) respectively).

1  
2  
3 Nsystems declined over the study period. Medical admission notes documented more  
4  
5 body systems than surgical notes. There were no differences between registrars, house  
6  
7 surgeons and trainee interns.  
8  
9

10 Fewer examinations were performed for palpable liver, palpable spleen, cardiac murmur  
11  
12 and apex beat location and character over the study period. There was no temporal  
13  
14 change in the positive findings of these observations or heart rate rounding.  
15  
16

17  
18 **Conclusions:** There has been a decline in the admission record at Wellington hospital  
19  
20 between 1975 and 2011, implying a deterioration in local doctors' physical examination  
21  
22 skills. Measures to counter this trend are discussed.  
23  
24  
25  
26  
27  
28  
29  
30  
31  
32  
33  
34  
35  
36  
37  
38  
39  
40  
41  
42  
43  
44  
45  
46  
47  
48  
49  
50  
51  
52  
53  
54  
55  
56  
57  
58  
59  
60

## Article Summary

### Article focus

- There is well-documented international evidence supporting a declining standard in junior doctor physical examination skills in recent years.
- This study was conducted to address the research question that this deterioration has occurred locally in Wellington, New Zealand.

### Key messages

- There has been a decline in the quantity and quality of the medical admission note examination records in this tertiary care centre between 1975 and 2011, which implies a decline in the examination skills of local junior doctors.
- Measures to address this decay in clinical ability include improved undergraduate curriculum, greater supervision of junior doctors, greater involvement of junior doctors in the admission process and increased staffing levels.

### Strengths and limitations of this study

- This is a significant study involving large numbers of patient admission records over a substantial period of time (358 patient records over four decades) with a multitude of statistically robust outcome measures analysed.
- Our study is limited due to its retrospective nature, **single-centre study**, the use of the “surrogate” marker of the written medical record to reflect clinical examination skills, and the confusing admission process, whereby doctors will see a patient but not necessarily “admit” them. **In addition, the data was extracted by only one researcher.**



## Introduction.

Thoughtful history taking and physical examination are recognised as fundamental to the practice of medicine.<sup>(1)</sup> Moreover, physicians rate physical examination as their most valuable skill.<sup>(2)</sup> It has also been shown that despite the current technology, physical examination remains important due to its diagnostic contribution,<sup>(3)</sup> positive effect on patient care<sup>(4)</sup> and cost reduction.<sup>(5)</sup>

There has been a well recognised international decline in the physical examination skills of doctors. Potential reasons for this deterioration include busy clinical workloads and lack of clinical teaching.<sup>(6,7)</sup> However it is generally recognised that the most important influence has been the increased availability of specialised diagnostic equipment.<sup>(8,9)</sup> Imaging technology such as ultrasound, CT and MRI have overshadowed the use of physical examination for diagnostic information.<sup>(8,9)</sup>

Although adding enormously to the cost of health care, these investigations are seen to be more accurate and less liable to litigation, than the more subjective art of physical examination.<sup>(8,9)</sup> It has been argued that the overuse of this technology has also helped to erode the teaching and skill in physical diagnosis<sup>(8,10)</sup> and that it may be undermining the value of these skills.<sup>(4)</sup> This is further impacted by the shift away from bedside teaching and supervision of physical examination skills during undergraduate years and early years of practice.<sup>(6,10,11)</sup> In the United States bedside teaching has fallen from 75% of clinical teaching in the 1960s<sup>(10)</sup> to 8-19% of clinical teaching in 2008.<sup>(12)</sup> Thus there are significant changes required from both the medical school and

1  
2  
3 hospital culture regarding physical examination skill acquisition, improvement and  
4  
5 retention.  
6  
7  
8  
9

10  
11 The medical record is a tool for communication between multiple health professionals,  
12  
13 facilitating continuity of care and good patient management. <sup>(13)</sup> There have been a  
14 number of studies referencing the importance of the quality of the medical record. <sup>(14-19)</sup>  
15

16  
17 The medical record is also a legal document and as such deserves the appropriate time  
18  
19 and attention to ensure it is “comprehensive and accurate”. <sup>(13)</sup> Some studies have  
20  
21 looked into ways to improve documentation such as introducing a clinical note header  
22  
23 section, <sup>(20)</sup> education and instruction <sup>(21, 22)</sup> and structured encounter forms <sup>(23)</sup> with  
24  
25 positive results. There are currently no evidence based standards for best practice  
26  
27 concerning adequacy of documentation of physical examination findings for Wellington  
28  
29 Hospital, neither are there any clinical guidelines derived from expert opinion. Thus it  
30  
31 is difficult to ascertain the expected minimum level of documentation. In order to  
32  
33 retrospectively investigate examination practice over time we are reliant on this medical  
34  
35 record for our information. The current study is inevitably an investigation into both the  
36  
37 skills of doctors and their documentation practices, although our primary hypothesis is  
38  
39 whether or not there has been a decline in the standards of junior doctors physical  
40  
41 examination skills.  
42  
43  
44  
45  
46  
47  
48  
49

## 50 **Methods**

51  
52  
53 This retrospective study looked at admission records from patients admitted to Capital  
54  
55 and Coast District Health Board (Wellington and Kenepuru Hospitals) between 1975  
56  
57  
58  
59  
60

1  
2  
3 and 2010. The records were randomly selected by National Health Index (NHI) number  
4  
5 if the patient had been admitted during this time with certain medical diagnoses, as  
6  
7 reflected by the “coding diagnosis” which enables clerical staff to enter the correct  
8  
9 computer information about each admission. 1998 was the earliest year for which we  
10 could get a random NHI list generated. In this way we obtained 300 sets of patient  
11 admission records, 100 from 1998, 100 from 2000 and 100 from 2010, from the medical  
12 records department at Wellington Hospital. Out of each set of 100 records there were 50  
13 general medical and 50 surgical admissions. The medical coding diagnoses were  
14 pneumonia, congestive heart failure, shortness of breath or chest pain. The surgical  
15 coding diagnoses were inguinal hernia, appendicitis, abdominal pain, fractured neck of  
16 femur or bowel obstruction. Many of these medical files included records from previous  
17 admissions to hospital. We included these older admission notes if they had been coded  
18 with the aforementioned diagnoses, and if there was at least 10 years temporal  
19 separation from the randomly selected admission and we used only one older admission  
20 per patient. Strict patient and staff confidentiality was maintained at all times.  
21  
22  
23  
24  
25  
26  
27  
28  
29  
30  
31  
32  
33  
34  
35  
36  
37  
38  
39

40 The admission note from each record was examined and the relevant data was extracted  
41 by one researcher, the primary author, with verification and close supervision by two  
42 other researchers (the corresponding and final authors). This data was entered into a  
43 pre-developed spreadsheet. If there was no admission note, we examined the last  
44 documented examination in the emergency department before ward admission. This  
45 was generally performed by the registrar of the admitting ward. The data from this  
46 examination was then entered as stated previously.  
47  
48  
49  
50  
51  
52  
53  
54  
55  
56  
57  
58  
59  
60

1  
2  
3 We recorded the total number of physical examination observations (PEO<sub>tot</sub>) that were  
4 documented per admission. We also documented the number of major body systems  
5 that had been examined (NSystems). These were defined as the cardiovascular,  
6 gastrointestinal, respiratory and central nervous systems. We then noted whether the  
7 relevant system pertaining to the presenting complaint had been examined (RelSystem).  
8  
9  
10  
11  
12  
13  
14 We then analysed the data in terms of year groups, in order to look for temporal change.  
15  
16  
17  
18  
19

20 We subsequently analysed the data according to whether it was a medical or surgical  
21 admission note, and the level of experience of the admitting doctor (registrars, house  
22 surgeons (HS) or trainee interns (TI)) with respect to PEO<sub>tot</sub>, Nsystems and RelSystem.  
23  
24  
25  
26 We also performed year group analysis on these subgroups.  
27  
28  
29  
30  
31  
32

33 We also investigated whether there was documentation of particular examination  
34 observations, positive or negative. These were palpable liver, palpable spleen, carotid  
35 bruit, cardiac murmur, apex beat location and character and fundoscopy. We analysed  
36 whether the frequency of these documented observations changed over time. Of the  
37 admission notes documenting the performance of these examinations, we then examined  
38 the frequency of positive findings and any change over time.  
39  
40  
41  
42  
43  
44  
45  
46  
47  
48  
49

50 Finally we investigated the documentation of heart rate. Of those admission notes with  
51 a heart rate value, we analysed the frequency with which the heart rate was given as a  
52 value perfectly divisible by five, suggesting a tendency of the admitting doctor toward  
53  
54  
55  
56  
57  
58  
59  
60

1  
2  
3 rounding the actual value and thus potential inaccuracy. We then examined for a  
4  
5 change in this trend over time.  
6  
7  
8  
9

## 10 11 **Results.**

12  
13  
14 We examined 358 patient admission records, from 266 patients admitted to Capital and  
15  
16 Coast District Health Board (Wellington and Kenepuru Hospitals) between 1975 and  
17  
18 2010. For administrative reasons we were unable to obtain 34 of the ordered sets of  
19  
20 notes. There was no statistically significant difference in the patients' age between the  
21  
22 year groups, after Kruskal-Wallis analysis. A biostatistician performed all analyses.  
23  
24  
25  
26  
27  
28

29  
30 As evidenced by the documentation in the hospital record admission notes, there has  
31  
32 been a statistically significant decrease (34%) in the total number of physical  
33  
34 examination observations per admission (PEOtot) from 1975 to 2011 ( $p < 0.001$ ).  
35  
36 (Figure 1).  
37  
38  
39  
40  
41  
42  
43  
44  
45  
46  
47  
48  
49  
50  
51  
52  
53  
54  
55  
56  
57  
58  
59  
60

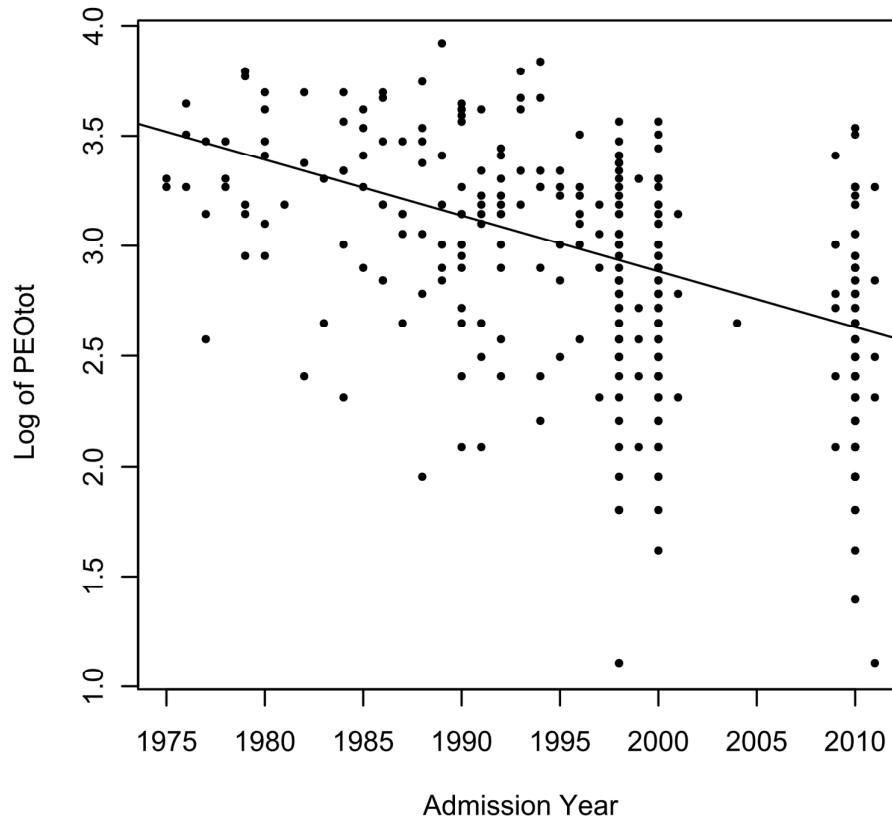

Figure 1: Total number of physical examination observations per admission (PEOtot) versus time.

There were significantly fewer (21%) total observations in surgical admission notes, compared to medical admission notes ( $p < 0.001$ ). Registrars recorded 12% fewer total observations compared to house surgeons ( $p < 0.001$ ). Statistical significance with respect to admission year group, specialty and level of experience of the admitting doctor in terms of predicting PEOtot was achieved by using the Wald  $\chi^2$  test. PEOtot was analysed as a negative binomial regression model (overdispersed data) by rendering the 'admission year' as a continuous variable and the 'admission ward' and 'doctor level of experience' as categorical variables.

1  
2  
3 With respect to the examination of the relevant system pertaining to the presenting  
4  
5 complaint (RelSystem), we have found that this occurred in 94% of all admission notes  
6  
7 (95% C.I.) and there was no statistically significant change over time ( $p < 0.1$ ). There  
8  
9 was however a significant difference according to specialty, with surgical doctors less  
10  
11 likely to have examined RelSystem compared to their medical counterparts (86% vs  
12  
13 98% respectively,  $p < 0.001$ ). Further subanalysis of specialty and RelSystem with  
14  
15 respect to year group showed no statistically significant differences except for the  
16  
17 2010s, in which 25% of surgical admissions did not record examination of the relevant  
18  
19 system compared with 3% of medical admissions ( $p < 0.05$ ); (pre 1990s ( $p > 0.05$ ), 1990s  
20  
21 ( $p < 0.1$ ) 2000s ( $p < 0.1$ )).

22  
23  
24  
25  
26 There was no statistically significant difference overall between examination of the  
27  
28 relevant system pertaining to their presenting complaint (RelSystem) with respect to  
29  
30 level of experience of admitting doctor (registrar, house surgeon and trainee intern)  
31  
32 ( $p < 0.01$ ). Further analysis by year groups shows a difference only for the 2010s, in  
33  
34 which registrars documented RelSystem in 97% of admissions compared to 65% of  
35  
36 house surgeons ( $p < 0.005$ ).

37  
38  
39  
40  
41  
42  
43 The total number of body systems examined (Nsystems) significantly declined over the  
44  
45 study period, with a change of 1.184 mean body systems ( $p < 0.001$ ). (Figure 2).  
46  
47  
48  
49  
50  
51  
52  
53  
54  
55  
56  
57  
58  
59  
60



Figure 2: Mean number of body systems examined per year group.

The most commonly omitted body system was the central nervous system, across all the year groups.

There was a significant difference according to specialty between medical and surgical admissions, with surgical doctors examining less Nsystems than physicians ( $p < 0.01$ ).

There were no significant differences between specialty within each of the year groups ( $p < 0.1$ ). With respect to the level of experience of the admitting doctor, there were no significant differences in Nsystems ( $p > 0.5$ ) or within year groups ( $p < 0.1$ ).



There was a significant decline over the study period in the percentage of admission notes with recorded examinations for palpable liver, palpable spleen, cardiac murmur and apex beat location and character ( $\chi^2 = 51.3, 47.8, 32.0, \text{ and } 57.9$ , respectively,  $df = 1, p < 0.001$ ). Statistical analysis was performed by Cochran-Armitage testing, and 95% confidence intervals were used. There was no significant change in the frequency of recorded examinations for carotid bruits ( $\chi^2 = 0.4, df = 1, p > 0.5$ ). There was no year group analysis performed for funduscopy, as this was only documented in the pre 90s year group. (Figure 3a)

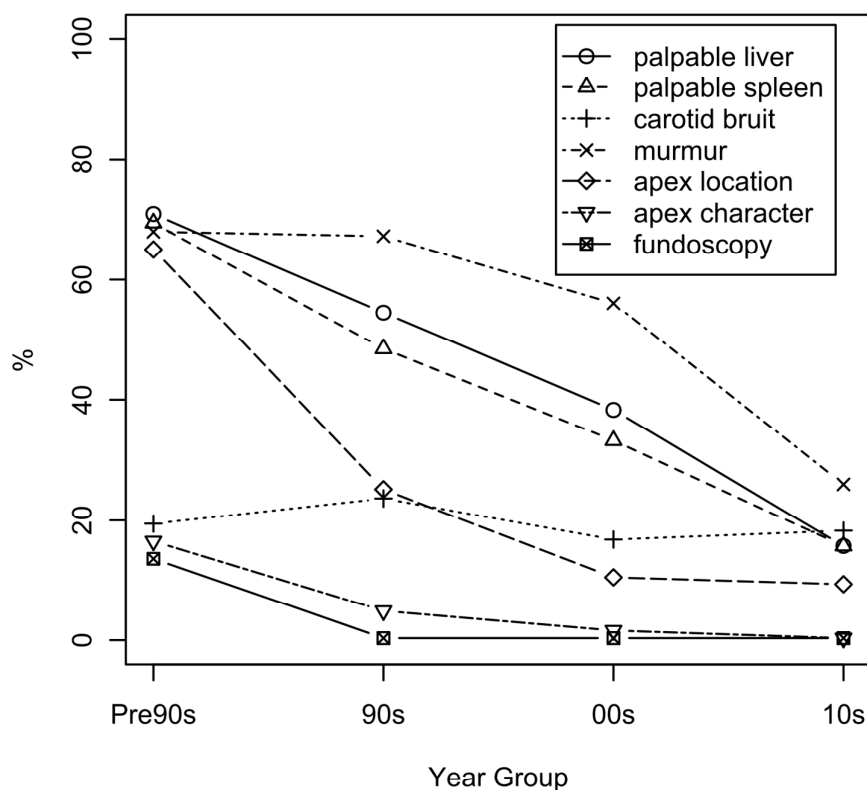

Figure 3a: Percentage of admission notes with recorded examinations for palpable liver, palpable spleen, carotid bruit, murmur, apex location, apex character and funduscopy versus year group.

There were no changes over time with respect to positive cardiac murmur, palpable liver, palpable spleen, carotid bruit, and apex beat location and character ( $\chi^2 = 0.01$ ,  $df = 1$ ,  $p > 0.5$  for cardiac murmur;  $\chi^2 = 1.5, 1.8, 1.7, 0.2$ , and  $0.5$  respectively,  $df = 1$ ,  $p > 0.5$  for the rest). This is probably due to the low frequency of positive findings within each of the year groups. Statistical analysis was performed by Cochran-Armitage testing, and 95% confidence intervals were used. (Figure 3b).

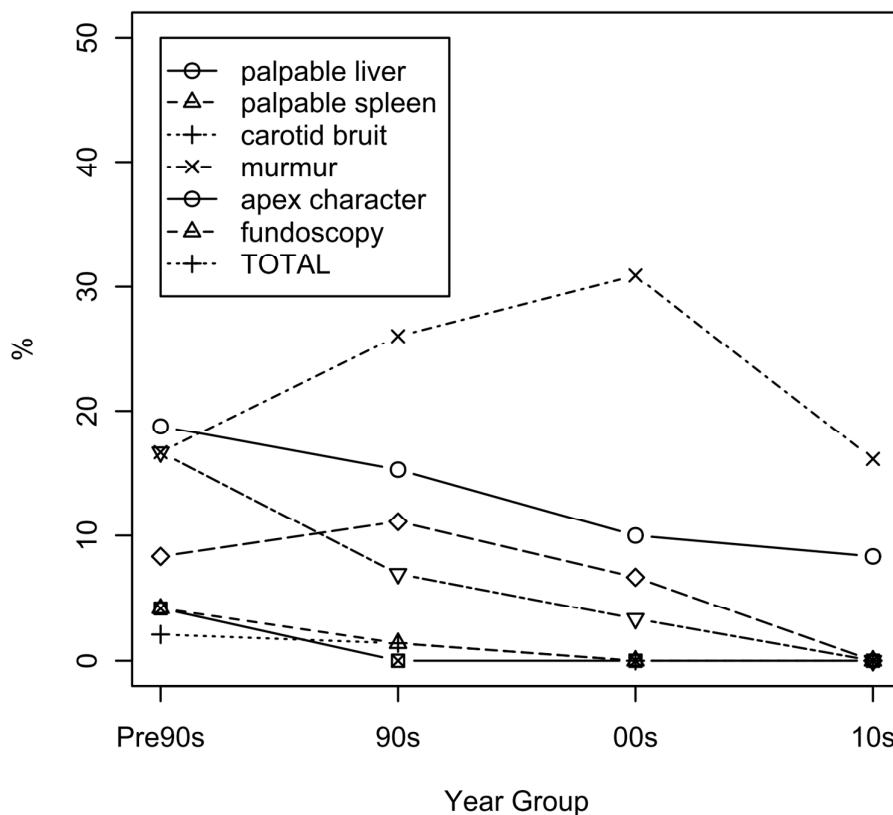

Figure 3b: Percentage of admission notes with positive findings for palpable liver, palpable spleen, carotid bruit, murmur, apex location, apex character and funduscopy versus year group.

We found that the vast majority of admission notes documented heart rate, with approximately 50% in each year group documenting a heart rate divisible by five and no change over time with respect to the latter ( $\chi^2 = 0.8$ ,  $df = 1$ ,  $p > 0.5$ ). Statistical analysis was provided by Cochran-Armitage testing, and 95% confidence intervals were used.

## **Discussion**

**Our** results imply that there has been deterioration in the physical examination skills of junior doctors in Wellington Hospital from 1975 to 2010, after detailed analysis of the medical admission record notes. This is evident from the observed decline in the recorded total number of physical examination observations, total number of body systems examined and the number of recorded observations for palpable liver, palpable spleen, cardiac murmur and apex beat location and character. In the author's opinion, this temporal deterioration could be due to the increased use and availability of complex diagnostic technology<sup>(8,9)</sup> as well as the concurrent loss of confidence in physical examination skills. **Busy workloads may necessitate substandard physical examinations and the resulting documentation.** Low examination skill proficiency after initial training, and little opportunity to improve these skills<sup>(6,7)</sup> and the resultant effect on student and teacher confidence further contribute to the demise of clinical examination. **Recent anecdotal comments from undergraduate students attached to surgical wards at Wellington Hospital suggest that junior staff transmit a negative view toward the value of physical examination skills, thus creating a 'cyclic' phenomenon of further medical deskilling with each year of medical graduates.**

Interestingly there has been no **general decline** in the examination of the relevant system pertaining to their presenting complaint (RelSystem). It could be argued that the latter

1  
2  
3 constitutes the 'bare minimum', and hence has suffered less than the other parts of the  
4  
5 medical admission record.  
6  
7  
8  
9

10  
11 We found that registrars recorded 12% fewer total observations than house surgeons. In  
12  
13 the authors' opinion, this could be a reflection of the local admission process, for both  
14  
15 medical and surgical patients. For many years, it has been the convention in Wellington  
16  
17 that registrars assess and diagnose the patient before instigating appropriate initial  
18  
19 therapy. Then the team house surgeon is called to finish the 'clerking' process – ie  
20  
21 complete the history and examination of the admission, chart the patients medications  
22  
23 and fluids etc. This is also the case for elective patients undergoing the preassessment  
24  
25 process before their scheduled surgery, where the initial documentation of the patients  
26  
27 medical problems is performed by an anaesthetist before the house surgeon interviews  
28  
29 the patient. This may not reflect practice in all New Zealand or international hospitals.  
30  
31  
32  
33  
34  
35  
36

37  
38 It remains unclear why surgical admission notes contain less total observations and  
39  
40 number of body systems than their medical counterparts. In the authors' opinion,  
41  
42 physicians may arguably take a more holistic approach to their patients, and are hence  
43  
44 more likely to examine more body systems and document a greater number of  
45  
46 examination findings. The differential diagnoses of medical complaints may be broader  
47  
48 than surgical complaints, warranting such a detailed assessment. Junior surgical staff  
49  
50 are frequently time pressured as they are often on call for acute assessments, as well as  
51  
52 being expected to be in the operating theatre. Surgical house officers are the only staff  
53  
54 available to deal with the often complex medical issues in the surgical ward. If this time  
55  
56 pressure is indeed a true factor in the declining standards of the surgical admission note,  
57  
58  
59  
60

1  
2  
3 greater surgical staffing resources could ameliorate this situation. Other measures that  
4  
5 may help reduce the workload include the involvement of senior medical staff early in  
6  
7 the admission process in managing complex medical problems. This is already  
8  
9 occurring in some wards, with Consultant Geriatricians seeing elderly orthopaedic  
10  
11 patients with hip fractures soon after admission. Certainly there is consensus regarding  
12  
13 the benefits resulting from the routine involvement of an elderly care physician in such  
14  
15 circumstances.<sup>(24)</sup> Many studies have shown shorter hospital stays, reduced mortality,  
16  
17 improved placement on discharge although there is conflicting evidence regarding cost-  
18  
19 savings.<sup>(24)</sup> While this approach may indeed benefit hospitals and orthogeriatric  
20  
21 patients, it may result in further clinical deskilling of junior doctors.  
22  
23  
24  
25  
26  
27  
28

29 Surgical admission notes contained less examination of the relevant system pertaining  
30  
31 to the presenting complaint compared to medical admission notes. This was especially  
32  
33 true in the 2010s year group. In the authors' opinion, this could be again due to the  
34  
35 surgical admission process, whereby the surgical registrar assesses the patient (and  
36  
37 presumably examines the relevant system) but does not actually complete a full  
38  
39 admission note, which is then completed by the surgical house officer. Anecdotal  
40  
41 experience shows that in recent years, junior staff completing the admission note often  
42  
43 do not feel it is necessary to repeat the examination of the relevant system, especially as  
44  
45 further examination of a tender abdomen or fractured limb can cause discomfort. This  
46  
47 is borne out by the subgroup analysis finding showing that in the 2010s year group the  
48  
49 registrars documented RelSystem in 97% of admissions, compared to 65% of house  
50  
51 surgeons.  
52  
53  
54  
55  
56  
57  
58  
59  
60

1  
2  
3 There were several limitations to our study. These include its retrospective nature, the  
4  
5 use of the “surrogate” marker of the medical record to reflect clinical examination  
6  
7 skills, and the confusing admission process, whereby doctors will see a patient but not  
8  
9 necessarily “admit” them. In addition, database restrictions in the medical records  
10  
11 department meant we were only able to request medical admission files from 1998  
12  
13 onwards. The study could have had greater statistical impact if we were able to access  
14  
15 large numbers of records from much earlier. We were able to obtain some earlier  
16  
17 admission notes, when these were co-filed with more contemporary records, although  
18  
19 these were not randomly selected. However these earlier notes were at least 10 years  
20  
21 apart from the other records, there was only one older file per patient, and statistical  
22  
23 analysis showed no difference in patient age across the year groups. This was single-  
24  
25 centre study, hence further research is warranted at other national and international  
26  
27 hospitals. Finally, our data was extracted by only one researcher, the first author,  
28  
29 however this was closely supervised and verified by two other researchers.  
30  
31  
32  
33  
34  
35  
36  
37

38 This is the second study from Wellington Hospital that has identified the declining  
39  
40 quality of the hospital admission note with regard to physical examination. A previous  
41  
42 Wellington study concluded that there has been a decline in the quality of the surgical  
43  
44 house surgeon admission note (SHSurgAdN) when comparing 2005 and 2009 (Morgan  
45  
46 TG, Dennet ER. Quality of House Surgeon Acute Surgical Admissions, 2005 vs 2009.  
47  
48 (personal communication)). The authors found that the SHSurgAdN was comparatively  
49  
50 deficient in the documentation of the relevant system examination and the cardio-  
51  
52 respiratory examination, and that this deficiency had worsened over the intervening four  
53  
54 years. This study faced similar limitations as the current study, ie it was single-centred,  
55  
56  
57 retrospective, the admission note was used as a surrogate for the assessment of the  
58  
59  
60

1  
2  
3 junior doctors physical examination skills, and the admission process is complicated.  
4  
5 However it was well designed and had good power, with 100 admission notes audited in  
6  
7 total. This study differed from the current study in that it incorporated a house surgeon  
8  
9 questionnaire, with questions on history taking as well as clinical examination. The  
10  
11 current study involves the investigation of an even greater number of admissions over a  
12  
13 longer time period, with more extracted data.  
14  
15  
16  
17  
18  
19

20 There are potential solutions to halt this decline in physical examination skills. Some  
21  
22 local barriers to clinical competence have been identified and ways to improve this  
23  
24 deficit have been suggested. <sup>(7)</sup> In the authors' opinion, these could include increased  
25  
26 senior supervision of the admitting process including formative feedback and reflection,  
27  
28 as well as a local cultural change enabling house surgeons to initially assess patients  
29  
30 while senior staff provide supervision and guidance. This would require increased  
31  
32 junior staffing or work-based changes to address workload issues, as well as  
33  
34 commitment from senior colleagues to ensure that there is no compromise to patient  
35  
36 safety. Finally, international evidence suggests that improved undergraduate curriculum  
37  
38 especially bedside teaching and enhanced supervision of new doctors could redirect the  
39  
40 current downward trend in physical examination. <sup>(6, 8, 10, 11)</sup>  
41  
42  
43  
44  
45  
46  
47

48 During the audit process in this study, there was also significant variation in the history  
49  
50 component of the admission note. The history is a vital part of the admission process,  
51  
52 and is crucial to diagnostic success. <sup>(25, 26)</sup> Further research is warranted regarding the  
53  
54 adequacy of history taking as evidenced by the admission record.  
55  
56  
57  
58  
59  
60

1  
2  
3  
4  
5  
6  
7  
8  
9  
10  
11  
12  
13  
14  
15  
16  
17  
18  
19  
20  
21  
22  
23  
24  
25  
26  
27  
28  
29  
30  
31  
32  
33  
34  
35  
36  
37  
38  
39  
40  
41  
42  
43  
44  
45  
46  
47  
48  
49  
50  
51  
52  
53  
54  
55  
56  
57  
58  
59  
60

**Competing interest statement:** All authors have completed the Unified Competing Interest form at [http://www.icmje.org/coi\\_disclosure.pdf](http://www.icmje.org/coi_disclosure.pdf) (available on request from the corresponding author) and declare: no support from any organisation for the submitted work; no financial relationships with any organisations that might have an interest in the submitted work in the previous three years, no other relationships or activities that could appear to have influenced the submitted work.

**Exclusive license statement:** The Corresponding Author has the right to grant on behalf of all authors and does grant on behalf of all authors, a non exclusive license on a worldwide basis to the BMJ Publishing Group Ltd and its Licensees to permit this article (if accepted) to be published in BMJ editions and any other BMJ PGL products and sublicenses to exploit all subsidiary rights, as set out in our license.



1  
2  
3  
4  
5  
6  
7 • **Authorship and Contributorship statement:** The authors listed have made  
8  
9 significant contributions to this paper. First author Ms. Oliver was involved in  
10 the extraction and processing of data, data analysis and interpretation, literature  
11 search, discussion points and initial draft formation. Second and corresponding  
12 author Dr Hunter is not only involved in an administrative and communication  
13 capacity but has contributed significantly with respect to study design, data  
14 extraction and analysis, interpretation and statistical analysis, literature search,  
15 and final paper revisions. Third author Dr Takayoshi is responsible for the  
16 statistical analysis and figures. Last author Associate Professor Galletly  
17 designed the study and was involved in the extraction of the data, interpretation  
18 of the data and critical review of the publication.  
19  
20  
21  
22  
23  
24  
25  
26  
27  
28  
29  
30  
31  
32  
33  
34  
35  
36  
37  
38  
39  
40  
41  
42  
43  
44  
45  
46  
47  
48  
49  
50  
51  
52  
53  
54  
55  
56  
57  
58  
59  
60

**Acknowledgements:** The original project was funded by the Research Office  
in the University of Otago Wellington. The authors would like to thank  
Professor Michael Harrison for his advice and help in revision of the paper.

## References

1. Li J. Clinical skills in the 21st century. *Archives of Internal Medicine*. 1994;154(1):22.
2. Kern DC, Parrinog TA, Korst DR. The lasting value of clinical skills. *Journal of the American Medical Association*. 1985;254(1):70.
3. Lembo NJ, Dell'Italia LJ, Crawford MH, O'Rourke RA. Bedside diagnosis of systolic murmurs. *New England Journal of Medicine*. 1988;318(24):1572-8.
4. Reilly B. Physical examination in the care of medical inpatients: an observational study. *The Lancet*. 2003;362(9390):1100-5.
5. Shaver JA. Cardiac auscultation: a cost-effective diagnostic skill. *Current problems in cardiology*. 1995;20(7):441.
6. Chan-Yan C, Gillies JH, Ruedy J, Marshall SA. Clinical skills of medical residents: a review of physical examination. *Canadian Medical Association Journal*. 1988;139(7):629.
7. Sheehan D, Wilkinson TJ, Billett S. Interns' participation and learning in clinical environments in a New Zealand hospital. *Acad Med*. 2005 Mar;80(3):302-8.
8. Mangione S, Peitzman S. Physical diagnosis in the 1990s. Art or artifact? *Journal of general internal medicine*. 1996;11(8):490-3.
9. Tavel M. Cardiac Auscultation: A Glorious Past - But Does It Have a Future? *Circulation*. 1996;93(6):1250-3.
10. LaCombe MA. On bedside teaching. *Annals of Internal Medicine*. 1997;126(3):217.
11. Crumlish CM, Yialamas MA, McMahon GT. Quantification of bedside teaching by an academic hospitalist group. *Journal of Hospital Medicine*. 2009;4(5):304-7.

- 1  
2  
3 12. Williams KN, Ramani S, Fraser B, Orlander JD. Improving bedside teaching:  
4 findings from a focus group of study learners. *Academic Medicine*. 2008;83(3):257.  
5  
6  
7 13. Cole's Medical Practice in New Zealand. Wellington Medical Council of New  
8 Zealand. 2011.  
9  
10  
11 14. Baker MD, Schoenfeld PS. Documentation in the pediatric emergency  
12 department: A review of resuscitation cases. *Annals of Emergency Medicine*.  
13 1991;20(6):641-3.  
14  
15  
16 15. Cox JL, Zitner D, Courtney KD, MacDonald DL, Paterson G, Cochrane B.  
17 Undocumented patient information: an impediment to quality of care. *American Journal*  
18 *of Medicine*. 2003;114(3):211-6.  
19  
20  
21 16. Dunlay SMMD, Alexander KPMD, Melloni CMD, Kraschnewski JLMD, Liang  
22 LP, Gibler WBMD. Medical Records and Quality of Care in Acute Coronary  
23 Syndromes: Results from CRUSADE. *Archives of Internal Medicine*.  
24 2008;168(15):1692-8.  
25  
26  
27 17. Hicks TA, Gentleman CA. Improving physician documentation through a  
28 clinical documentation management program. *Nursing Administration Quarterly*.  
29 2003;27(4):285.  
30  
31  
32 18. Liesenfeld B, Heekeren H, Schade G, Hepp KD. Quality of documentation in  
33 medical reports of diabetic patients. *International Journal for Quality in Health Care*.  
34 1996;8(6):537-42.  
35  
36  
37 19. Miller JM, Velanovich V. The natural language of the surgeon's clinical note in  
38 outcomes assessment: a qualitative analysis of the medical record. *American Journal of*  
39 *Surgery*. 2010;199(6):817-22.  
40  
41  
42  
43  
44  
45  
46  
47  
48  
49  
50  
51  
52  
53  
54  
55  
56  
57  
58  
59  
60

- 1  
2  
3  
4  
5  
6  
7  
8  
9  
10  
11  
12  
13  
14  
15  
16  
17  
18  
19  
20  
21  
22  
23  
24  
25  
26  
27  
28  
29  
30  
31  
32  
33  
34  
35  
36  
37  
38  
39  
40  
41  
42  
43  
44  
45  
46  
47  
48  
49  
50  
51  
52  
53  
54  
55  
56  
57  
58  
59  
60
20. Denny JC, Miller RA, Johnson KB, Spickard A, 3rd. Development and evaluation of a clinical note section header terminology [Evaluation Studies Research Support, U.S. Gov't, P.H.S.]. AMIA Annual Symposium proceedings. 2008:156-60.
21. Tinsley JA. An educational intervention to improve residents' inpatient charting. *Academic Psychiatry*. 2004  
;28(2):136-9.
22. Smith JJ, Bland SA, Mullett S. Temperature - the forgotten vital sign [Evaluation studies]. *Accident and Emergency Nursing* 2005;13(4):247-50.
23. Kanegaye JT, Cheng JC, McCaslin RI, Trocinski D, Silva PD. Improved documentation of wound care with a structured encounter form in the pediatric emergency department [Evaluation Studies]. *Ambulatory Pediatrics*. 2005;5(4):253-7.
24. Khan R, Fernandez C, Kashig F, Shedden R, Diggory P. Combined orthogeriatric care in the management of hip fractures: a prospective study. *Annals of the Royal College of Surgeons of England*. 2002;84:122-4.
25. Peterson MC, Holbrook JH, Hales D. Contributions of the History, Physical Examination and Laboratory Investigation in Making Medical Diagnoses. . *British Medical Journal*. 1992;156:163-5.
26. Hampton JR, M.J.G H, J.R.A. M. Relative contributions of history-taking, physical examination, and laboratory investigation to diagnosis and management of medical outpatients. . *British Medical Journal*. 1975;2(486-489).

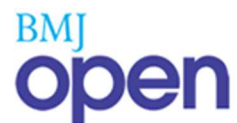

**Junior doctor skill in the art of physical examination: A retrospective study of the medical admission note over four decades**

|                                 |                                                                                                                                                |
|---------------------------------|------------------------------------------------------------------------------------------------------------------------------------------------|
| Journal:                        | <i>BMJ Open</i>                                                                                                                                |
| Manuscript ID:                  | bmjopen-2012-002257.R2                                                                                                                         |
| Article Type:                   | Research                                                                                                                                       |
| Date Submitted by the Author:   | 01-Feb-2013                                                                                                                                    |
| Complete List of Authors:       | Hunter, Selena; University of Otago, Wellington., Dept of Surgery and Anaesthesia<br>Oliver, Charlotte<br>Ikeda, Takayoshi<br>Galletly, Duncan |
| <b>Primary Subject Heading</b>: | Medical education and training                                                                                                                 |
| Secondary Subject Heading:      | Surgery, General practice / Family practice                                                                                                    |
| Keywords:                       | MEDICAL EDUCATION & TRAINING, Medical students, SURGERY                                                                                        |
|                                 |                                                                                                                                                |

SCHOLARONE™  
Manuscripts

1  
2  
3  
4  
5  
6  
7  
8 **Junior doctor skill in the art of physical examination: A retrospective**  
9 **study of the medical admission note over four decades**  
10

11 Charlotte M. Oliver, medical undergraduate<sup>1</sup>, Selena A. Hunter, senior lecturer in  
12 clinical examination<sup>2</sup>, Takayoshi Ikeda, research fellow and biostatistician<sup>3</sup>, and Duncan  
13 C. Galletly, associate professor and head of department<sup>2</sup>  
14

15  
16  
17  
18  
19 <sup>1</sup>School of Medicine and Health Sciences, University of Otago Wellington, PO Box  
20 7343 Wellington South Wellington 6242.  
21

22  
23  
24 <sup>2</sup>Department of Surgery and Anaesthesia, University of Otago, Wellington, 23A Mein  
25 St, Newtown, PO Box 7343, Wellington 6242, New Zealand.  
26

27  
28  
29 <sup>3</sup>Dean's Department, University of Otago, Wellington, New Zealand  
30  
31  
32  
33  
34  
35  
36  
37  
38  
39

40 Correspondence should be addressed to Dr Hunter, c/o Department of Surgery and  
41 Anaesthesia, University of Otago, Wellington, 23A Mein St, Newtown, PO Box 7343,  
42 Wellington 6242, New Zealand.  
43

44 Email: [selena.hunter@otago.ac.nz](mailto:selena.hunter@otago.ac.nz); Phone: 0116443855554; fax: 0116443895318; cell  
45 phone: 0116421390043  
46  
47  
48  
49  
50  
51  
52  
53  
54  
55  
56  
57  
58  
59  
60

## **Abstract.**

**Objectives** To investigate the hypothesis that junior doctors' examination skills are deteriorating by assessing the medical admission note examination record.

**Design** Retrospective study of the admission record.

**Setting** Tertiary care hospital.

**Methods:** The admission records of 266 patients admitted to Wellington hospital between 1975 and 2011 were analysed, according to the total number of [physical examination observations](#) (PEOtot), examination of the relevant system pertaining to the presenting complaint (RelSystem), and the number of body systems examined (Nsystems). Subgroup analysis proceeded according to admission year, level of experience of the admitting doctor (registrar, house surgeon (HS) and trainee intern (TI)) and medical versus surgical admission notes. Further analysis investigated the trend over time in documentation with respect to cardiac murmurs, palpable liver, palpable spleen, carotid bruit, heart rate, fundoscopy, and apex beat location and character.

**Results:** PEOtot declined by 34% from 1975 to 2011. Surgical admission notes had 21% fewer observations than medical notes.

RelSystem occurred in [94%](#) of admissions, with no decline over time. Medical notes documented this more frequently than surgical notes ([98%](#) and [86%](#) respectively).

There were no differences between registrars and HS, except for the 2010s subgroup ([97%](#) and [65%](#) respectively).

1  
2  
3  
4  
5  
6 Nsystems declined over the study period. Medical admission notes documented more  
7  
8 body systems than surgical notes. There were no differences between registrars, house  
9  
10 surgeons and trainee interns.

11  
12 | Fewer examinations were performed for palpable liver, palpable spleen, cardiac murmur  
13  
14 and apex beat location and character over the study period. There was no temporal  
15  
16 change in the positive findings of these observations or heart rate rounding.  
17  
18

19 **Conclusions:** There has been a decline in the admission record at Wellington hospital  
20  
21 between 1975 and 2011, implying a deterioration in local doctors' physical examination  
22  
23 skills. Measures to counter this trend are discussed.  
24  
25  
26  
27  
28  
29  
30  
31  
32  
33  
34  
35  
36  
37  
38  
39  
40  
41  
42  
43  
44  
45  
46  
47  
48  
49  
50  
51  
52  
53  
54  
55  
56  
57  
58  
59  
60



## Article Summary

### Article focus

- There is well-documented international evidence supporting a declining standard in junior doctor physical examination skills in recent years.
- This study was conducted to address the research question that this deterioration has occurred locally in Wellington, New Zealand.

### Key messages

- There has been a decline in the quantity and quality of the medical admission note examination records in this tertiary care centre between 1975 and 2011, which implies a decline in the examination skills of local junior doctors.
- Measures to address this decay in clinical ability include improved undergraduate curriculum, greater supervision of junior doctors, greater involvement of junior doctors in the admission process and increased staffing levels.

### Strengths and limitations of this study

- This is a significant study involving large numbers of patient admission records over a substantial period of time (358 patient records over four decades) with a multitude of statistically robust outcome measures analysed.
- Our study is limited due to its retrospective nature, [single-centre study](#), the use of the “surrogate” marker of the written medical record to reflect clinical examination skills, and the confusing admission process, whereby doctors will see a patient but not necessarily “admit” them. [In addition, the data was extracted by only one researcher.](#)

## Introduction.

Thoughtful history taking and physical examination are recognised as fundamental to the practice of medicine. <sup>(1)</sup> Moreover, physicians rate physical examination as their most valuable skill. <sup>(2)</sup> It has also been shown that despite the current technology, physical examination remains important due to its diagnostic contribution, <sup>(3)</sup> positive effect on patient care <sup>(4)</sup> and cost reduction. <sup>(5)</sup>

There has been a well recognised international decline in the physical examination skills of doctors. Potential reasons for this deterioration include busy clinical workloads and lack of clinical teaching. <sup>(6,7)</sup> However it is generally recognised that the most important influence has been the increased availability of specialised diagnostic equipment. <sup>(8,9)</sup> Imaging technology such as ultrasound, CT and MRI have overshadowed the use of physical examination for diagnostic information. <sup>(8,9)</sup>

Although adding enormously to the cost of health care, these investigations are seen to be more accurate and less liable to litigation, than the more subjective art of physical examination. <sup>(8,9)</sup> It has been argued that the overuse of this technology has also helped to erode the teaching and skill in physical diagnosis <sup>(8,10)</sup> and that it may be undermining the value of these skills. <sup>(4)</sup> This is further impacted by the shift away from bedside teaching and supervision of physical examination skills during undergraduate years and early years of practice. <sup>(6,10,11)</sup> In the United States bedside teaching has fallen from 75% of clinical teaching in the 1960s <sup>(10)</sup> to 8-19% of clinical teaching in 2008. <sup>(12)</sup> Thus there are significant changes required from both the medical school and

1  
2  
3  
4  
5  
6 hospital culture regarding physical examination skill acquisition, improvement and  
7  
8 retention.  
9

10  
11  
12  
13 The medical record is a tool for communication between multiple health professionals,  
14  
15 facilitating continuity of care and good patient management. <sup>(13)</sup> There have been a  
16  
17 number of studies referencing the importance of the quality of the medical record. <sup>(14-19)</sup>  
18

19  
20 The medical record is also a legal document and as such deserves the appropriate time  
21  
22 and attention to ensure it is “comprehensive and accurate”. <sup>(13)</sup> Some studies have  
23  
24 looked into ways to improve documentation such as introducing a clinical note header  
25  
26 section, <sup>(20)</sup> education and instruction <sup>(21, 22)</sup> and structured encounter forms <sup>(23)</sup> with  
27  
28 positive results. There are currently no evidence based standards for best practice  
29  
30 concerning adequacy of documentation of physical examination findings for Wellington  
31  
32 Hospital, neither are there any clinical guidelines derived from expert opinion. Thus it  
33  
34 is difficult to ascertain the expected minimum level of documentation. In order to  
35  
36 retrospectively investigate examination practice over time we are reliant on this medical  
37  
38 record for our information. The current study is inevitably an investigation into both the  
39  
40 skills of doctors and their documentation practices, although our primary hypothesis is  
41  
42 that there has been a decline in the standards of junior doctors physical examination  
43  
44 skills.  
45

## 46 47 48 **Methods**

49  
50  
51 This retrospective study looked at admission records from patients admitted to Capital  
52  
53 and Coast District Health Board (Wellington and Kenepuru Hospitals) between 1975  
54  
55  
56  
57  
58  
59  
60

1  
2  
3  
4  
5  
6 and 2010. The records were randomly selected by National Health Index (NHI) number  
7  
8 if the patient had been admitted during this time with certain medical diagnoses, as  
9  
10 reflected by the “coding diagnosis” which enables clerical staff to enter the correct  
11  
12 computer information about each admission. 1998 was the earliest year for which we  
13  
14 could get a random NHI list generated. In this way we obtained 300 sets of patient  
15  
16 admission records, 100 from 1998, 100 from 2000 and 100 from 2010, from the medical  
17  
18 records department at Wellington Hospital. Out of each set of 100 records there were 50  
19  
20 general medical and 50 surgical admissions. The medical coding diagnoses were  
21  
22 pneumonia, congestive heart failure, shortness of breath or chest pain. The surgical  
23  
24 coding diagnoses were inguinal hernia, appendicitis, abdominal pain, fractured neck of  
25  
26 femur or bowel obstruction. Many of these medical files included records from previous  
27  
28 admissions to hospital. We included these older admission notes if they had been coded  
29  
30 with the aforementioned diagnoses, and if there was at least 10 years temporal  
31  
32 separation from the randomly selected admission and we used only one older admission  
33  
34 per patient. Strict patient and staff confidentiality was maintained at all times.  
35  
36  
37  
38

39 The admission note from each record was examined and the relevant data was extracted  
40  
41 by one researcher, the primary author, with verification and close supervision by two  
42  
43 other researchers (the corresponding and final authors). This data was entered into a  
44  
45 pre-developed spreadsheet. If there was no admission note, we examined the last  
46  
47 documented examination in the emergency department before ward admission. This  
48  
49 was generally performed by the registrar of the admitting ward. The data from this  
50  
51 examination was then entered as stated previously.  
52  
53  
54  
55  
56  
57  
58  
59  
60

**Comment [SH1]:** We wanted to get records from 1990, 2000 and 2010 however 1998 was the earliest we could get medical records from using the NHI number . However as explained we were then able to access earlier admission files from within these records, from as far back as 1975, but we only used one old admission file per patient and made sure there was at least 10 years temporal separation from the randomly selected admission. For statistical reasons we then grouped all admission records into pre-1990s, 1990s, 2000's and 2010s.

1  
2  
3  
4  
5  
6 We recorded the total number of physical examination observations (PEOtot) that were  
7 documented per admission. We also documented the number of major body systems  
8 that had been examined (NSystems). These were defined as the cardiovascular,  
9 gastrointestinal, respiratory and central nervous systems. We then noted whether the  
10 relevant system pertaining to the presenting complaint had been examined (RelSystem).  
11  
12  
13  
14  
15  
16 We then analysed the data in terms of year groups, in order to look for temporal change.  
17  
18  
19  
20

21 We subsequently analysed the data according to whether it was a medical or surgical  
22 admission note, and the level of experience of the admitting doctor (registrars, house  
23 surgeons (HS) or trainee interns (TI)) with respect to PEOtot, Nsystems and RelSystem.  
24  
25  
26 We also performed year group analysis on these subgroups.  
27  
28  
29  
30  
31

32 We also investigated whether there was documentation of particular examination  
33 observations, positive or negative. These were palpable liver, palpable spleen, carotid  
34 bruit, cardiac murmur, apex beat location and character and fundoscopy. We analysed  
35 whether the frequency of these documented observations changed over time. Of the  
36 admission notes documenting the performance of these examinations, we then examined  
37 the frequency of positive findings and any change over time.  
38  
39  
40  
41  
42  
43  
44  
45  
46

47 Finally we investigated the documentation of heart rate. Of those admission notes with  
48 a heart rate value, we analysed the frequency with which the heart rate was given as a  
49 value perfectly divisible by five, suggesting a tendency of the admitting doctor toward  
50  
51  
52  
53  
54  
55  
56  
57  
58  
59  
60

1  
2  
3  
4  
5  
6 rounding the actual value and thus potential inaccuracy. We then examined for a  
7  
8 change in this trend over time.  
9  
10

### 11 12 13 **Results.**

14  
15  
16 We examined 358 patient admission records, from 266 patients admitted to Capital and  
17  
18 Coast District Health Board (Wellington and Kenepuru Hospitals) between 1975 and  
19  
20 2010. For administrative reasons we were unable to obtain 34 of the ordered sets of  
21  
22 notes. There was no statistically significant difference in the patients' age between the  
23  
24 year groups, after Kruskal-Wallis analysis. A biostatistician performed all analyses.  
25  
26

Comment [SH2]: This was indeed Dr Takayoshi

27  
28  
29 As evidenced by the documentation in the hospital record admission notes, there has  
30  
31 been a statistically significant decrease (34%) in the total number of physical  
32  
33 examination observations per admission (PEOtot) from 1975 to 2011 ( $p < 0.001$ ).  
34  
35 (Figure 1).  
36  
37  
38  
39  
40  
41  
42  
43  
44  
45  
46  
47  
48  
49  
50  
51  
52  
53  
54  
55  
56  
57  
58  
59  
60

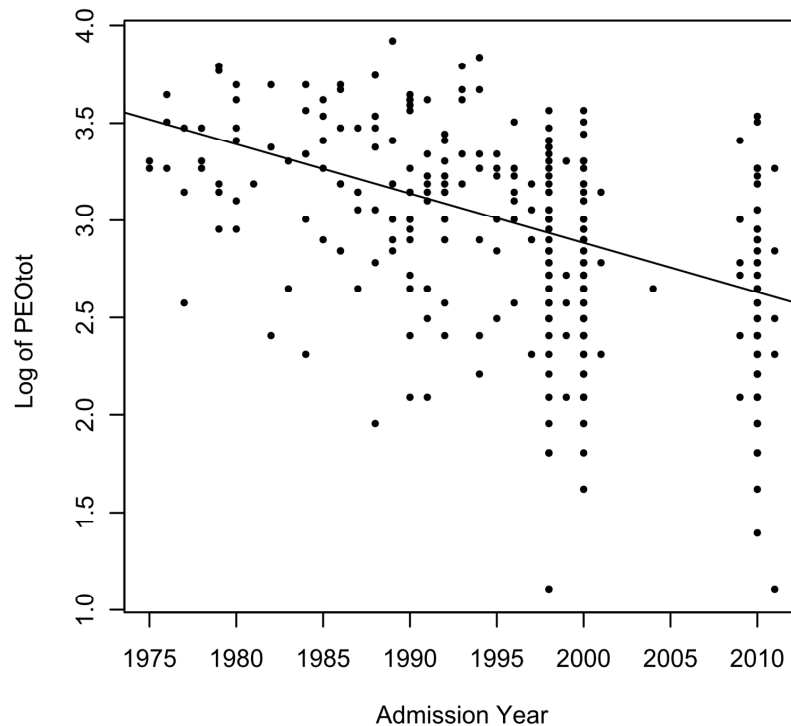

Figure 1: Total number of physical examination observations per admission (PEOtot) versus time.

There were significantly fewer (21%) total observations in surgical admission notes, compared to medical admission notes ( $p < 0.001$ ). Registrars recorded 12% fewer total observations compared to house surgeons ( $p < 0.001$ ). Statistical significance with respect to admission year group, specialty and level of experience of the admitting doctor in terms of predicting PEOtot was achieved by using the Wald  $\chi^2$  test. PEOtot was analysed as a negative binomial regression model (overdispersed data) by rendering the 'admission year' as a continuous variable and the 'admission ward' and 'doctor level of experience' as categorical variables.

1  
2  
3  
4  
5  
6 With respect to the examination of the relevant system pertaining to the presenting  
7  
8 complaint (RelSystem), we have found that this occurred in 94% of all admission notes  
9  
10 (95% C.I.) and there was no statistically significant change over time ( $p < 0.1$ ). There  
11  
12 was however a significant difference according to specialty, with surgical doctors less  
13  
14 likely to have examined RelSystem compared to their medical counterparts (86% vs  
15  
16 98% respectively,  $p < 0.001$ ). Further subanalysis of specialty and RelSystem with  
17  
18 respect to year group showed no statistically significant differences except for the  
19  
20 2010s, in which 25% of surgical admissions did not record examination of the relevant  
21  
22 system compared with 3% of medical admissions ( $p < 0.05$ ); (pre 1990s ( $p > 0.05$ ), 1990s  
23  
24 ( $p < 0.1$ ) 2000s ( $p < 0.1$ )).

25  
26 There was no statistically significant difference overall between examination of the  
27  
28 relevant system pertaining to their presenting complaint (RelSystem) with respect to  
29  
30 level of experience of admitting doctor (registrar, house surgeon and trainee intern)  
31  
32 ( $p < 0.01$ ). Further analysis by year groups shows a difference only for the 2010s, in  
33  
34 which registrars documented RelSystem in 97% of admissions compared to 65% of  
35  
36 house surgeons ( $p < 0.005$ ).

37  
38  
39  
40  
41 The total number of body systems examined (Nsystems) significantly declined over the  
42  
43 study period, with a change of 1.184 mean body systems ( $p < 0.001$ ). (Figure 2).  
44  
45  
46  
47  
48  
49  
50  
51  
52  
53  
54  
55  
56  
57  
58  
59  
60



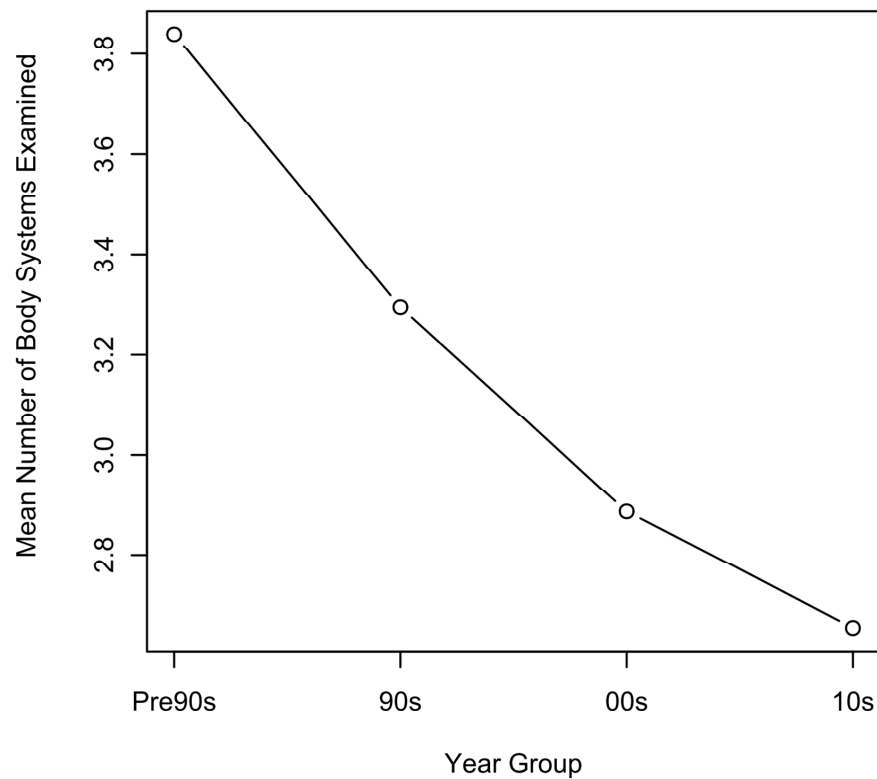

Figure 2: Mean number of body systems examined per year group.

The most commonly omitted body system was the central nervous system, across all the year groups.

There was a significant difference according to specialty between medical and surgical admissions, with surgical doctors examining less Nsystems than physicians ( $p < 0.01$ ).

There were no significant differences between specialty within each of the year groups ( $p < 0.1$ ). With respect to the level of experience of the admitting doctor, there were no significant differences in Nsystems ( $p > 0.5$ ) or within year groups ( $p < 0.1$ ).

There was a significant decline over the study period in the percentage of admission notes with recorded examinations for palpable liver, palpable spleen, cardiac murmur and apex beat location and character ( $\chi^2 = 51.3, 47.8, 32.0,$  and  $57.9,$  respectively,  $df = 1, p < 0.001$ ). Statistical analysis was performed by Cochran-Armitage testing, and 95% confidence intervals were used. There was no significant change in the frequency of recorded examinations for carotid bruits ( $\chi^2 = 0.4, df = 1, p > 0.5$ ). There was no year group analysis performed for fundoscopy, as this was only documented in the pre 90s year group. (Figure 3a)

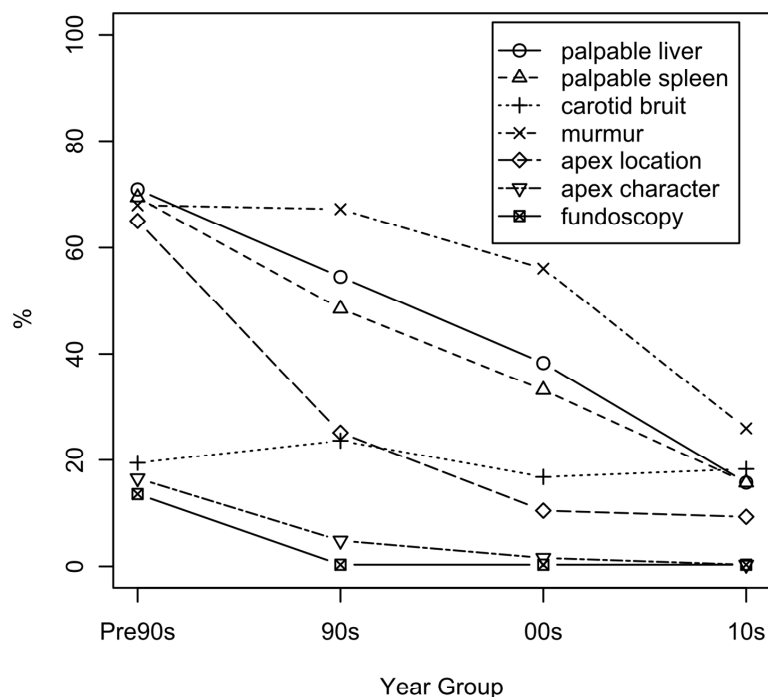

Figure 3a: Percentage of admission notes with recorded examinations for palpable liver, palpable spleen, carotid bruit, murmur, apex location, apex character and fundoscopy versus year group.

There were no changes over time with respect to positive cardiac murmur, palpable liver, palpable spleen, carotid bruit, and apex beat location and character ( $\chi^2 = 0.01$ ,  $df = 1$ ,  $p > 0.5$  for cardiac murmur;  $\chi^2 = 1.5, 1.8, 1.7, 0.2$ , and  $0.5$  respectively,  $df = 1$ ,  $p > 0.5$  for the rest). This is probably due to the low frequency of positive findings within each of the year groups. Statistical analysis was performed by Cochran-Armitage testing, and 95% confidence intervals were used. (Figure 3b).

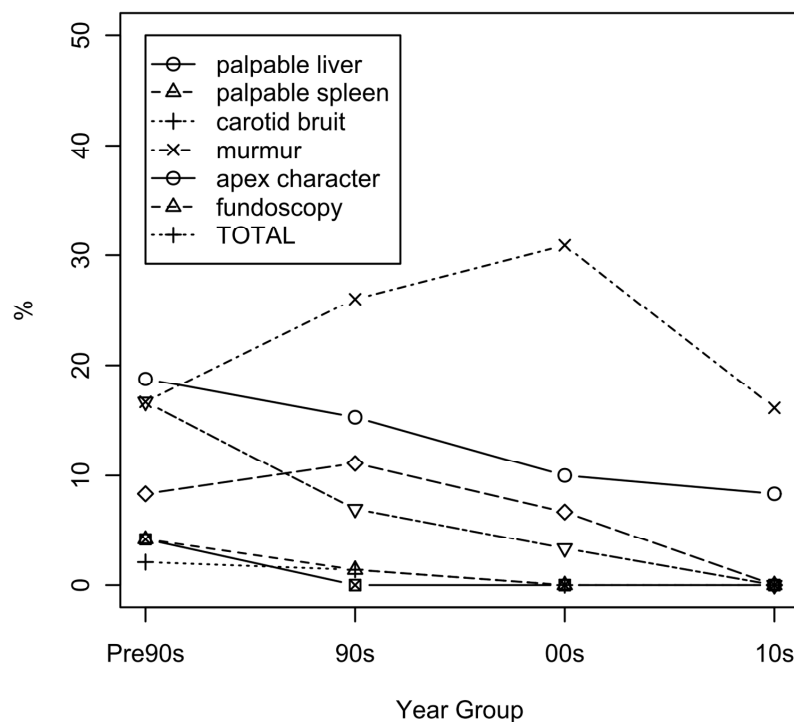

Figure 3b: Percentage of admission notes with positive findings for palpable liver, palpable spleen, carotid bruit, murmur, apex location, apex character and funduscopy versus year group.

We found that the vast majority of admission notes documented heart rate, with approximately 50% in each year group documenting a heart rate divisible by five and no change over time with respect to the latter ( $\chi^2 = 0.8$ ,  $df = 1$ ,  $p > 0.5$ ). Statistical analysis was provided by Cochran-Armitage testing, and 95% confidence intervals were used.

## Discussion

Our results imply that there has been deterioration in the physical examination skills of junior doctors in Wellington Hospital from 1975 to 2010, after detailed analysis of the medical admission record notes. This is evident from the observed decline in the recorded total number of physical examination observations, total number of body systems examined and the number of recorded observations for palpable liver, palpable spleen, cardiac murmur and apex beat location and character. In the author's opinion, this temporal deterioration could be due to the increased use and availability of complex diagnostic technology<sup>(8, 9)</sup> as well as the concurrent loss of confidence in physical examination skills. Busy workloads may necessitate substandard physical examinations and the resulting documentation. Low examination skill proficiency after initial training, and little opportunity to improve these skills<sup>(6, 7)</sup> and the resultant effect on student and teacher confidence further contribute to the demise of clinical examination. Recent anecdotal comments from undergraduate students attached to surgical wards at Wellington Hospital suggest that junior staff transmit a negative view toward the value of physical examination skills, thus creating a 'cyclic' phenomenon of further medical deskilling with each year of medical graduates.

Interestingly there has been no general decline in the examination of the relevant system pertaining to their presenting complaint (RelSystem). It could be argued that the latter

1  
2  
3  
4  
5  
6 constitutes the 'bare minimum', and hence has suffered less than the other parts of the  
7  
8 medical admission record.  
9  
10

11  
12  
13 We found that registrars recorded 12% fewer total observations than house surgeons. In  
14 the authors' opinion, this could be a reflection of the local admission process, for both  
15 medical and surgical patients. For many years, it has been the convention in Wellington  
16 that registrars assess and diagnose the patient before instigating appropriate initial  
17 therapy. Then the team house surgeon is called to finish the 'clerking' process – ie  
18 complete the history and examination of the admission, chart the patients medications  
19 and fluids etc. This is also the case for elective patients undergoing the preassessment  
20 process before their scheduled surgery, where the initial documentation of the patients  
21 medical problems is performed by an anaesthetist before the house surgeon interviews  
22 the patient. This may not reflect practice in all New Zealand or international hospitals.  
23  
24  
25  
26  
27  
28  
29  
30  
31  
32  
33  
34  
35

36 It remains unclear why surgical admission notes contain less total observations and  
37 number of body systems than their medical counterparts. In the authors' opinion,  
38 physicians may arguably take a more holistic approach to their patients, and are hence  
39 more likely to examine more body systems and document a greater number of  
40 examination findings. The differential diagnoses of medical complaints may be broader  
41 than surgical complaints, warranting such a detailed assessment. Junior surgical staff  
42 are frequently time pressured as they are often on call for acute assessments, as well as  
43 being expected to be in the operating theatre. Surgical house officers are the only staff  
44 available to deal with the often complex medical issues in the surgical ward. If this time  
45 pressure is indeed a true factor in the declining standards of the surgical admission note,  
46  
47  
48  
49  
50  
51  
52  
53  
54  
55  
56  
57  
58  
59  
60

1  
2  
3  
4  
5  
6 greater surgical staffing resources could ameliorate this situation. Other measures that  
7  
8 may help reduce the workload include the involvement of senior medical staff early in  
9  
10 the admission process in managing complex medical problems. This is already  
11  
12 occurring in some wards, with Consultant Geriatricians seeing elderly orthopaedic  
13  
14 patients with hip fractures soon after admission. Certainly there is consensus regarding  
15  
16 the benefits resulting from the routine involvement of an elderly care physician in such  
17  
18 circumstances.<sup>(24)</sup> Many studies have shown shorter hospital stays, reduced mortality,  
19  
20 improved placement on discharge although there is conflicting evidence regarding cost-  
21  
22 savings.<sup>(24)</sup> While this approach may indeed benefit hospitals and orthogeriatric  
23  
24 patients, it may result in further clinical deskilling of junior doctors.

25  
26  
27  
28  
29 Surgical admission notes contained less examination of the relevant system pertaining  
30  
31 to the presenting complaint compared to medical admission notes. This was especially  
32  
33 true in the 2010s year group. In the authors' opinion, this could be again due to the  
34  
35 surgical admission process, whereby the surgical registrar assesses the patient (and  
36  
37 presumably examines the relevant system) but does **not** actually complete a full  
38  
39 admission note, which is then completed by the surgical house officer. Anecdotal  
40  
41 experience shows that in recent years, junior staff completing the admission note often  
42  
43 do **not** feel it is necessary to repeat the examination of the relevant system, especially as  
44  
45 further examination of a tender abdomen or fractured limb can cause discomfort. This  
46  
47 is borne out by the subgroup analysis finding showing that in the 2010s year group the  
48  
49 registrars documented RelSystem in 97% of admissions, compared to 65% of house  
50  
51 surgeons.

1  
2  
3  
4  
5  
6 There were several limitations to our study. These include its retrospective nature, the  
7  
8 use of the “surrogate” marker of the medical record to reflect clinical examination  
9  
10 skills, and the confusing admission process, whereby doctors will see a patient but not  
11  
12 necessarily “admit” them. In addition, database restrictions in the medical records  
13  
14 department meant we were only able to request medical admission files from 1998  
15  
16 onwards. The study could have had greater statistical impact if we were able to access  
17  
18 large numbers of records from much earlier. We were able to obtain some earlier  
19  
20 admission notes, when these were co-filed with more contemporary records, although  
21  
22 these were not randomly selected. However these earlier notes were at least 10 years  
23  
24 apart from the other records, there was only one older file per patient, and statistical  
25  
26 analysis showed no difference in patient age across the year groups. This was single-  
27  
28 centre study, hence further research is warranted at other national and international  
29  
30 hospitals. Finally, our data was extracted by only one researcher, the first author,  
31  
32 however this was closely supervised and verified by two other researchers.  
33  
34  
35  
36

37 This is the second study from Wellington Hospital that has identified the declining  
38  
39 quality of the hospital admission note with regard to physical examination. A previous  
40  
41 Wellington study concluded that there has been a decline in the quality of the surgical  
42  
43 house surgeon admission note (SHSurgAdN) when comparing 2005 and 2009. (Morgan  
44  
45 TG, Dennet ER. Quality of House Surgeon Acute Surgical Admissions, 2005 vs 2009.  
46  
47 (personal communication)). The authors found that the SHSurgAdN was comparatively  
48  
49 deficient in the documentation of the relevant system examination and the cardio-  
50  
51 respiratory examination, and that this deficiency had worsened over the intervening four  
52  
53 years. This study faced similar limitations as the current study, ie it was single-centred,  
54  
55 retrospective, the admission note was used as a surrogate for the assessment of the  
56  
57  
58  
59  
60

1  
2  
3  
4  
5  
6 junior doctors physical examination skills, and the admission process is complicated.

7  
8 However it was well designed and had good power, with 100 admission notes audited in  
9  
10 total. This study differed from the current study in that it incorporated a house surgeon  
11  
12 questionnaire, with questions on history taking as well as clinical examination. The  
13  
14 current study involves the investigation of an even greater number of admissions over a  
15  
16 longer time period, with more extracted data.  
17  
18  
19  
20

21 There are potential solutions to halt this decline in physical examination skills. Some  
22  
23 local barriers to clinical competence have been identified and ways to improve this  
24  
25 deficit have been suggested.<sup>(7)</sup> In the authors' opinion, these could include increased  
26  
27 senior supervision of the admitting process including formative feedback and reflection,  
28  
29 as well as a local cultural change enabling house surgeons to initially assess patients  
30  
31 while senior staff provide supervision and guidance. This would require increased  
32  
33 junior staffing or work-based changes to address workload issues, as well as  
34  
35 commitment from senior colleagues to ensure that there is no compromise to patient  
36  
37 safety. Finally, international evidence suggests that improved undergraduate curriculum  
38  
39 especially bedside teaching and enhanced supervision of new doctors could redirect the  
40  
41 current downward trend in physical examination.<sup>(6, 8, 10, 11)</sup>  
42  
43  
44  
45

46 During the audit process in this study, there was also significant variation in the history  
47  
48 component of the admission note. The history is a vital part of the admission process,  
49  
50 and is crucial to diagnostic success.<sup>(25, 26)</sup> Further research is warranted regarding the  
51  
52 adequacy of history taking as evidenced by the admission record.  
53  
54  
55  
56  
57  
58  
59  
60



1  
2  
3  
4  
5  
6  
7  
8  
9  
10  
11  
12  
13  
14  
15  
16  
17  
18  
19  
20  
21  
22  
23  
24  
25  
26  
27  
28  
29  
30  
31  
32  
33  
34  
35  
36  
37  
38  
39  
40  
41  
42  
43  
44  
45  
46  
47  
48  
49  
50  
51  
52  
53  
54  
55  
56  
57  
58  
59  
60

**Competing interest statement:** All authors have completed the Unified Competing Interest form at [http://www.icmje.org/coi\\_disclosure.pdf](http://www.icmje.org/coi_disclosure.pdf) (available on request from the corresponding author) and declare: no support from any organisation for the submitted work; no financial relationships with any organisations that might have an interest in the submitted work in the previous three years, no other relationships or activities that could appear to have influenced the submitted work.

**Exclusive license statement:** The Corresponding Author has the right to grant on behalf of all authors and does grant on behalf of all authors, a non exclusive license on a worldwide basis to the BMJ Publishing Group Ltd and its Licensees to permit this article (if accepted) to be published in BMJ editions and any other BMJ PGL products and sublicenses to exploit all subsidiary rights, as set out in our license.

1  
2  
3  
4  
5  
6  
7  
8  
9  
10 **Authorship and Contributorship statement:** The authors listed have made  
11 significant contributions to this paper. First author Ms. Oliver was involved in  
12 the extraction and processing of data, data analysis and interpretation, literature  
13 search, discussion points and initial draft formation. Second and corresponding  
14 author Dr Hunter is not only involved in an administrative and communication  
15 capacity but has contributed significantly with respect to study design, data  
16 extraction and analysis, interpretation and statistical analysis, literature search,  
17 and final paper revisions. Third author Dr Takayoshi is responsible for the  
18 statistical analysis and figures. Last author Associate Professor Galletly  
19 designed the study and was involved in the extraction of the data. interpretation  
20 of the data and critical review of the publication.  
21  
22  
23  
24  
25  
26  
27  
28  
29  
30  
31  
32  
33  
34

35 **Acknowledgements:** The original project was funded by the Research Office  
36 in the University of Otago Wellington. The authors would like to thank  
37 Professor Michael Harrison for his advice and help in revision of the paper.  
38  
39  
40  
41  
42  
43  
44  
45  
46  
47  
48  
49  
50  
51  
52  
53  
54  
55  
56  
57  
58  
59  
60

## References

1. Li J. Clinical skills in the 21st century. *Archives of Internal Medicine*. 1994;154(1):22.
2. Kern DC, Parrinog TA, Korst DR. The lasting value of clinical skills. *Journal of the American Medical Association*. 1985;254(1):70.
3. Lembo NJ, Dell'Italia LJ, Crawford MH, O'Rourke RA. Bedside diagnosis of systolic murmurs. *New England Journal of Medicine*. 1988;318(24):1572-8.
4. Reilly B. Physical examination in the care of medical inpatients: an observational study. *The Lancet*. 2003;362(9390):1100-5.
5. Shaver JA. Cardiac auscultation: a cost-effective diagnostic skill. *Current problems in cardiology*. 1995;20(7):441.
6. Chan-Yan C, Gillies JH, Ruedy J, Marshall SA. Clinical skills of medical residents: a review of physical examination. *Canadian Medical Association Journal*. 1988;139(7):629.
7. Sheehan D, Wilkinson TJ, Billett S. Interns' participation and learning in clinical environments in a New Zealand hospital. *Acad Med*. 2005 Mar;80(3):302-8.
8. Mangione S, Peitzman S. Physical diagnosis in the 1990s. Art or artifact? *Journal of general internal medicine*. 1996;11(8):490-3.
9. Tavel M. Cardiac Auscultation: A Glorious Past - But Does It Have a Future? *Circulation*. 1996;93(6):1250-3.
10. LaCombe MA. On bedside teaching. *Annals of Internal Medicine*. 1997;126(3):217.
11. Crumlish CM, Yialamas MA, McMahon GT. Quantification of bedside teaching by an academic hospitalist group. *Journal of Hospital Medicine*. 2009;4(5):304-7.

- 1  
2  
3  
4  
5  
6 12. Williams KN, Ramani S, Fraser B, Orlander JD. Improving bedside teaching:  
7 findings from a focus group of study learners. *Academic Medicine*. 2008;83(3):257.  
8  
9  
10 13. Cole's Medical Practice in New Zealand. Wellington Medical Council of New  
11 Zealand. 2011.  
12  
13  
14 14. Baker MD, Schoenfeld PS. Documentation in the pediatric emergency  
15 department: A review of resuscitation cases. *Annals of Emergency Medicine*.  
16 1991;20(6):641-3.  
17  
18  
19 15. Cox JL, Zitner D, Courtney KD, MacDonald DL, Paterson G, Cochrane B.  
20 Undocumented patient information: an impediment to quality of care. *American Journal*  
21 *of Medicine*. 2003;114(3):211-6.  
22  
23  
24 16. Dunlay SMMD, Alexander KPMD, Melloni CMD, Kraschnewski JLMD, Liang  
25 LP, Gibler WBMD. Medical Records and Quality of Care in Acute Coronary  
26 Syndromes: Results from CRUSADE. *Archives of Internal Medicine*.  
27 2008;168(15):1692-8.  
28  
29  
30 17. Hicks TA, Gentleman CA. Improving physician documentation through a  
31 clinical documentation management program. *Nursing Administration Quarterly*.  
32 2003;27(4):285.  
33  
34  
35 18. Liesenfeld B, Heekeren H, Schade G, Hepp KD. Quality of documentation in  
36 medical reports of diabetic patients. *International Journal for Quality in Health Care*.  
37 1996;8(6):537-42.  
38  
39  
40 19. Miller JM, Velanovich V. The natural language of the surgeon's clinical note in  
41 outcomes assessment: a qualitative analysis of the medical record. *American Journal of*  
42 *Surgery*. 2010;199(6):817-22.  
43  
44  
45  
46  
47  
48  
49  
50  
51  
52  
53  
54  
55  
56  
57  
58  
59  
60

- 1  
2  
3  
4  
5  
6 20. Denny JC, Miller RA, Johnson KB, Spickard A, 3rd. Development and  
7 evaluation of a clinical note section header terminology [Evaluation Studies Research  
8 Support, U.S. Gov't, P.H.S.]. AMIA Annual Symposium proceedings. 2008:156-60.  
9  
10  
11 21. Tinsley JA. An educational intervention to improve residents' inpatient charting.  
12 Academic Psychiatry. 2004  
13 ;28(2):136-9.  
14  
15  
16 22. Smith JJ, Bland SA, Mullett S. Temperature - the forgotten vital sign  
17 [Evaluation studies]. Accident and Emergency Nursing 2005;13(4):247-50.  
18  
19  
20 23. Kanegaye JT, Cheng JC, McCaslin RI, Trocinski D, Silva PD. Improved  
21 documentation of wound care with a structured encounter form in the pediatric  
22 emergency department [Evaluation Studies]. Ambulatory Pediatrics. 2005;5(4):253-7.  
23  
24  
25  
26  
27  
28 24. Khan R, Fernandez C, Kashig F, Shedden R, Diggory P. Combined  
29 orthogeriatric care in the management of hip fractures: a prospective study. Annals of  
30 the Royal College of Surgeons of England. 2002;84:122-4.  
31  
32  
33  
34 25. Peterson MC, Holbrook JH, Hales D. Contributions of the History, Physical  
35 Examination and Laboratory Investigation in Making Medical Diagnoses. . British  
36 Medical Journal. 1992;156:163-5.  
37  
38  
39  
40 26. Hampton JR, M.J.G H, J.R.A. M. Relative contributions of history-taking,  
41 physical examination, and laboratory investigation to diagnosis and management of  
42 medical outpatients. . British Medical Journal. 1975;2(486-489).  
43  
44  
45  
46  
47  
48  
49  
50  
51  
52  
53  
54  
55  
56  
57  
58  
59  
60

1  
2  
3  
4  
5 **Junior doctor skill in the art of physical examination: A retrospective**  
6 **study of the medical admission note over four decades**  
7  
8

9 Charlotte M. Oliver, medical undergraduate<sup>1</sup>, Selena A. Hunter, senior lecturer in  
10 clinical examination<sup>2</sup>, Takayoshi Ikeda, research fellow and biostatistician<sup>3</sup>, and Duncan  
11 C. Galletly, associate professor and head of department<sup>2</sup>  
12

13  
14  
15  
16  
17  
18 <sup>1</sup>School of Medicine and Health Sciences, University of Otago Wellington, PO Box  
19 7343 Wellington South Wellington 6242.  
20

21  
22  
23 <sup>2</sup>Department of Surgery and Anaesthesia, University of Otago, Wellington, 23A Mein  
24 St, Newtown, PO Box 7343, Wellington 6242, New Zealand.  
25  
26

27  
28 <sup>3</sup>Dean's Department, University of Otago, Wellington, New Zealand  
29  
30  
31  
32  
33  
34  
35  
36  
37  
38  
39  
40

41 Correspondence should be addressed to Dr Hunter, c/o Department of Surgery and  
42 Anaesthesia, University of Otago, Wellington, 23A Mein St, Newtown, PO Box 7343,  
43 Wellington 6242, New Zealand.  
44

45 Email: [selena.hunter@otago.ac.nz](mailto:selena.hunter@otago.ac.nz); Phone: 0116443855554; fax: 0116443895318; cell  
46 phone: 0116421390043  
47  
48  
49  
50  
51  
52  
53  
54  
55  
56  
57  
58  
59  
60

## **Abstract.**

**Objectives** To investigate the hypothesis that junior doctors' examination skills are deteriorating by assessing the medical admission note examination record.

**Design** Retrospective study of the admission record.

**Setting** Tertiary care hospital.

**Methods:** The admission records of 266 patients admitted to Wellington hospital between 1975 and 2011 were analysed, according to the total number of physical examination observations (PEO<sub>tot</sub>), examination of the relevant system pertaining to the presenting complaint (RelSystem), and the number of body systems examined (N<sub>systems</sub>). Subgroup analysis proceeded according to admission year, level of experience of the admitting doctor (registrar, house surgeon (HS) and trainee intern (TI)) and medical versus surgical admission notes. Further analysis investigated the trend over time in documentation with respect to cardiac murmurs, palpable liver, palpable spleen, carotid bruit, heart rate, fundoscopy, and apex beat location and character.

**Results:** PEO<sub>tot</sub> declined by 34% from 1975 to 2011. Surgical admission notes had 21% fewer observations than medical notes.

RelSystem occurred in 94% of admissions, with no decline over time. Medical notes documented this more frequently than surgical notes (98% and 86% respectively).

There were no differences between registrars and HS, except for the 2010s subgroup (97% and 65% respectively).

1  
2  
3 Nsystems declined over the study period. Medical admission notes documented more  
4  
5 body systems than surgical notes. There were no differences between registrars, house  
6  
7 surgeons and trainee interns.  
8  
9

10 Fewer examinations were performed for palpable liver, palpable spleen, cardiac murmur  
11  
12 and apex beat location and character over the study period. There was no temporal  
13  
14 change in the positive findings of these observations or heart rate rounding.  
15  
16

17  
18 **Conclusions:** There has been a decline in the admission record at Wellington hospital  
19  
20 between 1975 and 2011, implying a deterioration in local doctors' physical examination  
21  
22 skills. Measures to counter this trend are discussed.  
23  
24  
25  
26  
27  
28  
29  
30  
31  
32  
33  
34  
35  
36  
37  
38  
39  
40  
41  
42  
43  
44  
45  
46  
47  
48  
49  
50  
51  
52  
53  
54  
55  
56  
57  
58  
59  
60



## **Article Summary**

### **Article focus**

- There is well-documented international evidence supporting a declining standard in junior doctor physical examination skills in recent years.
- This study was conducted to address the research question that this deterioration has occurred locally in Wellington, New Zealand.

### **Key messages**

- There has been a decline in the quantity and quality of the medical admission note examination records in this tertiary care centre between 1975 and 2011, which implies a decline in the examination skills of local junior doctors.
- Measures to address this decay in clinical ability include improved undergraduate curriculum, greater supervision of junior doctors, greater involvement of junior doctors in the admission process and increased staffing levels.

### **Strengths and limitations of this study**

- This is a significant study involving large numbers of patient admission records over a substantial period of time (358 patient records over four decades) with a multitude of statistically robust outcome measures analysed.
- Our study is limited due to its retrospective nature, single-centre study, the use of the “surrogate” marker of the written medical record to reflect clinical examination skills, and the confusing admission process, whereby doctors will see a patient but not necessarily “admit” them. In addition, the data was extracted by only one researcher.

## **Introduction.**

Thoughtful history taking and physical examination are recognised as fundamental to the practice of medicine.<sup>(1)</sup> Moreover, physicians rate physical examination as their most valuable skill.<sup>(2)</sup> It has also been shown that despite the current technology, physical examination remains important due to its diagnostic contribution,<sup>(3)</sup> positive effect on patient care<sup>(4)</sup> and cost reduction.<sup>(5)</sup>

There has been a well recognised international decline in the physical examination skills of doctors. Potential reasons for this deterioration include busy clinical workloads and lack of clinical teaching.<sup>(6,7)</sup> However it is generally recognised that the most important influence has been the increased availability of specialised diagnostic equipment.<sup>(8,9)</sup> Imaging technology such as ultrasound, CT and MRI have overshadowed the use of physical examination for diagnostic information.<sup>(8,9)</sup>

Although adding enormously to the cost of health care, these investigations are seen to be more accurate and less liable to litigation, than the more subjective art of physical examination.<sup>(8,9)</sup> It has been argued that the overuse of this technology has also helped to erode the teaching and skill in physical diagnosis<sup>(8,10)</sup> and that it may be undermining the value of these skills.<sup>(4)</sup> This is further impacted by the shift away from bedside teaching and supervision of physical examination skills during undergraduate years and early years of practice.<sup>(6,10,11)</sup> In the United States bedside teaching has fallen from 75% of clinical teaching in the 1960s<sup>(10)</sup> to 8-19% of clinical teaching in 2008.<sup>(12)</sup> Thus there are significant changes required from both the medical school and

1  
2  
3 hospital culture regarding physical examination skill acquisition, improvement and  
4  
5 retention.  
6  
7  
8  
9

10  
11 The medical record is a tool for communication between multiple health professionals,  
12 facilitating continuity of care and good patient management.<sup>(13)</sup> There have been a  
13 number of studies referencing the importance of the quality of the medical record.<sup>(14-19)</sup>  
14  
15 The medical record is also a legal document and as such deserves the appropriate time  
16 and attention to ensure it is “comprehensive and accurate”.<sup>(13)</sup> Some studies have  
17 looked into ways to improve documentation such as introducing a clinical note header  
18 section,<sup>(20)</sup> education and instruction<sup>(21,22)</sup> and structured encounter forms<sup>(23)</sup> with  
19 positive results. There are currently no evidence based standards for best practice  
20 concerning adequacy of documentation of physical examination findings for Wellington  
21 Hospital, neither are there any clinical guidelines derived from expert opinion. Thus it  
22 is difficult to ascertain the expected minimum level of documentation. In order to  
23 retrospectively investigate examination practice over time we are reliant on this medical  
24 record for our information. The current study is inevitably an investigation into both the  
25 skills of doctors and their documentation practices, although our primary hypothesis is  
26 that there has been a decline in the standards of junior doctors physical examination  
27 skills.  
28  
29  
30  
31  
32  
33  
34  
35  
36  
37  
38  
39  
40  
41  
42  
43  
44  
45  
46  
47  
48  
49

## 50 **Methods**

51  
52  
53  
54 This retrospective study looked at admission records from patients admitted to Capital  
55 and Coast District Health Board (Wellington and Kenepuru Hospitals) between 1975  
56  
57  
58  
59  
60

1  
2  
3 and 2010. The records were randomly selected by National Health Index (NHI) number  
4  
5 if the patient had been admitted during this time with certain medical diagnoses, as  
6  
7 reflected by the “coding diagnosis” which enables clerical staff to enter the correct  
8  
9 computer information about each admission. 1998 was the earliest year for which we  
10  
11 could get a random NHI list generated. In this way we obtained 300 sets of patient  
12  
13 admission records, 100 from 1998, 100 from 2000 and 100 from 2010, from the medical  
14  
15 records department at Wellington Hospital. Out of each set of 100 records there were 50  
16  
17 general medical and 50 surgical admissions. The medical coding diagnoses were  
18  
19 pneumonia, congestive heart failure, shortness of breath or chest pain. The surgical  
20  
21 coding diagnoses were inguinal hernia, appendicitis, abdominal pain, fractured neck of  
22  
23 femur or bowel obstruction. Many of these medical files included records from previous  
24  
25 admissions to hospital. We included these older admission notes if they had been coded  
26  
27 with the aforementioned diagnoses, and if there was at least 10 years temporal  
28  
29 separation from the randomly selected admission and we used only one older admission  
30  
31 per patient. Strict patient and staff confidentiality was maintained at all times.  
32  
33  
34  
35  
36  
37  
38  
39

40 The admission note from each record was examined and the relevant data was extracted  
41  
42 by one researcher, the primary author, with verification and close supervision by two  
43  
44 other researchers (the corresponding and final authors). This data was entered into a  
45  
46 pre-developed spreadsheet. If there was no admission note, we examined the last  
47  
48 documented examination in the emergency department before ward admission. This  
49  
50 was generally performed by the registrar of the admitting ward. The data from this  
51  
52 examination was then entered as stated previously.  
53  
54  
55  
56  
57  
58  
59  
60

1  
2  
3 We recorded the total number of physical examination observations (PEO<sub>tot</sub>) that were  
4 documented per admission. We also documented the number of major body systems  
5 that had been examined (N<sub>Systems</sub>). These were defined as the cardiovascular,  
6 gastrointestinal, respiratory and central nervous systems. We then noted whether the  
7 relevant system pertaining to the presenting complaint had been examined (Rel<sub>System</sub>).  
8  
9 We then analysed the data in terms of year groups, in order to look for temporal change.  
10  
11  
12  
13  
14  
15  
16  
17  
18  
19

20 We subsequently analysed the data according to whether it was a medical or surgical  
21 admission note, and the level of experience of the admitting doctor (registrars, house  
22 surgeons (HS) or trainee interns (TI)) with respect to PEO<sub>tot</sub>, N<sub>systems</sub> and Rel<sub>System</sub>.  
23  
24 We also performed year group analysis on these subgroups.  
25  
26  
27  
28  
29  
30  
31  
32

33 We also investigated whether there was documentation of particular examination  
34 observations, positive or negative. These were palpable liver, palpable spleen, carotid  
35 bruit, cardiac murmur, apex beat location and character and fundoscopy. We analysed  
36 whether the frequency of these documented observations changed over time. Of the  
37 admission notes documenting the performance of these examinations, we then examined  
38 the frequency of positive findings and any change over time.  
39  
40  
41  
42  
43  
44  
45  
46  
47  
48  
49

50 Finally we investigated the documentation of heart rate. Of those admission notes with  
51 a heart rate value, we analysed the frequency with which the heart rate was given as a  
52 value perfectly divisible by five, suggesting a tendency of the admitting doctor toward  
53  
54  
55  
56  
57  
58  
59  
60

1  
2  
3 rounding the actual value and thus potential inaccuracy. We then examined for a  
4  
5 change in this trend over time.  
6  
7  
8  
9

## 10 11 **Results.** 12

13  
14 We examined 358 patient admission records, from 266 patients admitted to Capital and  
15  
16 Coast District Health Board (Wellington and Kenepuru Hospitals) between 1975 and  
17  
18 2010. For administrative reasons we were unable to obtain 34 of the ordered sets of  
19  
20 notes. There was no statistically significant difference in the patients' age between the  
21  
22 year groups, after Kruskal-Wallis analysis. A biostatistician performed all analyses.  
23  
24  
25  
26  
27  
28

29  
30 As evidenced by the documentation in the hospital record admission notes, there has  
31  
32 been a statistically significant decrease (34%) in the total number of physical  
33  
34 examination observations per admission (PEO<sub>tot</sub>) from 1975 to 2011 ( $p < 0.001$ ).  
35  
36 (Figure 1).  
37  
38  
39  
40  
41  
42  
43  
44

45  
46 There were significantly fewer (21%) total observations in surgical admission notes,  
47  
48 compared to medical admission notes ( $p < 0.001$ ). Registrars recorded 12% fewer total  
49  
50 observations compared to house surgeons ( $p < 0.001$ ). Statistical significance with  
51  
52 respect to admission year group, specialty and level of experience of the admitting  
53  
54 doctor in terms of predicting PEO<sub>tot</sub> was achieved by using the Wald  $\chi^2$  test. PEO<sub>tot</sub>  
55  
56 was analysed as a negative binomial regression model (overdispersed data) by rendering  
57  
58  
59  
60

1  
2  
3 the 'admission year' as a continuous variable and the 'admission ward' and 'doctor  
4  
5 level of experience' as categorical variables.  
6  
7  
8  
9

10  
11 With respect to the examination of the relevant system pertaining to the presenting  
12  
13 complaint (RelSystem), we have found that this occurred in 94% of all admission notes  
14  
15 (95%C.I.) and there was no statistically significant change over time ( $p<0.1$ ). There  
16  
17 was however a significant difference according to specialty, with surgical doctors less  
18  
19 likely to have examined RelSystem compared to their medical counterparts (86% vs  
20  
21 98% respectively,  $p<0.001$ ). Further subanalysis of specialty and RelSystem with  
22  
23 respect to year group showed no statistically significant differences except for the  
24  
25 2010s, in which 25% of surgical admissions did not record examination of the relevant  
26  
27 system compared with 3% of medical admissions ( $p<0.05$ ); (pre 1990s ( $p>0.05$ ), 1990s  
28  
29 ( $p<0.1$ ) 2000s ( $p<0.1$ )).  
30  
31  
32  
33

34  
35 There was no statistically significant difference overall between examination of the  
36  
37 relevant system pertaining to their presenting complaint (RelSystem) with respect to  
38  
39 level of experience of admitting doctor (registrar, house surgeon and trainee intern)  
40  
41 ( $p<0.01$ ). Further analysis by year groups shows a difference only for the 2010s, in  
42  
43 which registrars documented RelSystem in 97% of admissions compared to 65% of  
44  
45 house surgeons ( $p<0.005$ ).  
46  
47  
48  
49  
50

51  
52 The total number of body systems examined (Nsystems) significantly declined over the  
53  
54 study period, with a change of 1.184 mean body systems ( $p<0.001$ ). (Figure 2).  
55  
56  
57  
58  
59  
60

1  
2  
3  
4  
5  
6 The most commonly omitted body system was the central nervous system, across all the  
7  
8 year groups.  
9

10  
11 There was a significant difference according to specialty between medical and surgical  
12  
13 admissions, with surgical doctors examining less Nsystems than physicians ( $p < 0.01$ ).  
14

15  
16 There were no significant differences between specialty within each of the year groups  
17  
18 ( $p < 0.1$ ). With respect to the level of experience of the admitting doctor, there were no  
19  
20 significant differences in Nsystems ( $p > 0.5$ ) or within year groups ( $p < 0.1$ ).  
21  
22

23  
24  
25  
26 There was a significant decline over the study period in the percentage of admission  
27  
28 notes with recorded examinations for palpable liver, palpable spleen, cardiac murmur  
29  
30 and apex beat location and character ( $\chi^2 = 51.3, 47.8, 32.0, \text{ and } 57.9$ , respectively,  $df =$   
31  
32  $1, p < 0.001$ ). Statistical analysis was performed by Cochran-Armitage testing, and  
33  
34 95% confidence intervals were used. There was no significant change in the frequency  
35  
36 of recorded examinations for carotid bruits ( $\chi^2 = 0.4, df = 1, p > 0.5$ ). There was no  
37  
38 year group analysis performed for fundoscopy, as this was only documented in the pre  
39  
40 90s year group. ). (Figure 3a)  
41  
42  
43  
44  
45  
46  
47  
48  
49  
50  
51  
52  
53

54  
55 There were no changes over time with respect to positive cardiac murmur, palpable  
56  
57 liver, palpable spleen, carotid bruit, and apex beat location and character ( $\chi^2 = 0.01, df =$   
58  
59  
60



1  
2  
3 1,  $p > 0.5$  for cardiac murmur;  $\chi^2 = 1.5, 1.8, 1.7, 0.2,$  and  $0.5$  respectively,  $df = 1, p >$   
4  
5  $0.5$  for the rest). This is probably due to the low frequency of positive findings within  
6  
7 each of the year groups. Statistical analysis was performed by Cochran-Armitage  
8  
9 testing, and 95% confidence intervals were used. (Figure 3b).  
10  
11

12  
13  
14  
15 We found that the vast majority of admission notes documented heart rate, with  
16  
17 approximately 50% in each year group documenting a heart rate divisible by five and no  
18  
19 change over time with respect to the latter ( $\chi^2 = 0.8, df = 1, p > 0.5$ ). Statistical analysis  
20  
21 was provided by Cochran-Armitage testing, and 95% confidence intervals were used.  
22  
23  
24  
25  
26  
27  
28  
29  
30  
31  
32  
33

### 34 **Discussion**

35  
36  
37 Our results imply that there has been deterioration in the physical examination skills of  
38  
39 junior doctors in Wellington Hospital from 1975 to 2010, after detailed analysis of the  
40  
41 medical admission record notes. This is evident from the observed decline in the  
42  
43 recorded total number of physical examination observations, total number of body  
44  
45 systems examined and the number of recorded observations for palpable liver, palpable  
46  
47 spleen, cardiac murmur and apex beat location and character. In the author's opinion,  
48  
49 this temporal deterioration could be due to the increased use and availability of complex  
50  
51 diagnostic technology<sup>(8,9)</sup> as well as the concurrent loss of confidence in physical  
52  
53 examination skills. Busy workloads may necessitate substandard physical examinations  
54  
55 and the resulting documentation. Low examination skill proficiency after initial  
56  
57  
58  
59  
60

1  
2  
3 training, and little opportunity to improve these skills<sup>(6,7)</sup> and the resultant effect on  
4  
5 student and teacher confidence further contribute to the demise of clinical examination.  
6  
7 Recent anecdotal comments from undergraduate students attached to surgical wards at  
8  
9 Wellington Hospital suggest that junior staff transmit a negative view toward the value  
10  
11 of physical examination skills, thus creating a 'cyclic' phenomenon of further medical  
12  
13 deskillling with each year of medical graduates.  
14  
15

16  
17  
18  
19  
20 Interestingly there has been no general decline in the examination of the relevant system  
21  
22 pertaining to their presenting complaint (RelSystem). It could be argued that the latter  
23  
24 constitutes the 'bare minimum', and hence has suffered less than the other parts of the  
25  
26 medical admission record.  
27  
28

29  
30  
31  
32 We found that registrars recorded 12% fewer total observations than house surgeons. In  
33  
34 the authors' opinion, this could be a reflection of the local admission process, for both  
35  
36 medical and surgical patients. For many years, it has been the convention in Wellington  
37  
38 that registrars assess and diagnose the patient before instigating appropriate initial  
39  
40 therapy. Then the team house surgeon is called to finish the 'clerking' process – ie  
41  
42 complete the history and examination of the admission, chart the patients medications  
43  
44 and fluids etc. This is also the case for elective patients undergoing the preassessment  
45  
46 process before their scheduled surgery, where the initial documentation of the patients  
47  
48 medical problems is performed by an anaesthetist before the house surgeon interviews  
49  
50 the patient. This may not reflect practice in all New Zealand or international hospitals.  
51  
52  
53  
54  
55  
56  
57  
58  
59  
60

1  
2  
3 It remains unclear why surgical admission notes contain less total observations and  
4  
5 number of body systems than their medical counterparts. In the authors' opinion,  
6  
7 physicians may arguably take a more holistic approach to their patients, and are hence  
8  
9 more likely to examine more body systems and document a greater number of  
10  
11 examination findings. The differential diagnoses of medical complaints may be broader  
12  
13 than surgical complaints, warranting such a detailed assessment. Junior surgical staff  
14  
15 are frequently time pressured as they are often on call for acute assessments, as well as  
16  
17 being expected to be in the operating theatre. Surgical house officers are the only staff  
18  
19 available to deal with the often complex medical issues in the surgical ward. If this time  
20  
21 pressure is indeed a true factor in the declining standards of the surgical admission note,  
22  
23 greater surgical staffing resources could ameliorate this situation. Other measures that  
24  
25 may help reduce the workload include the involvement of senior medical staff early in  
26  
27 the admission process in managing complex medical problems. This is already  
28  
29 occurring in some wards, with Consultant Geriatricians seeing elderly orthopaedic  
30  
31 patients with hip fractures soon after admission. Certainly there is consensus regarding  
32  
33 the benefits resulting from the routine involvement of an elderly care physician in such  
34  
35 circumstances.<sup>(24)</sup> Many studies have shown shorter hospital stays, reduced mortality,  
36  
37 improved placement on discharge although there is conflicting evidence regarding cost-  
38  
39 savings.<sup>(24)</sup> While this approach may indeed benefit hospitals and orthogeriatric  
40  
41 patients, it may result in further clinical deskilling of junior doctors.  
42  
43  
44  
45  
46  
47  
48  
49  
50

51 Surgical admission notes contained less examination of the relevant system pertaining  
52  
53 to the presenting complaint compared to medical admission notes. This was especially  
54  
55 true in the 2010s year group. In the authors' opinion, this could be again due to the  
56  
57 surgical admission process, whereby the surgical registrar assesses the patient (and  
58  
59  
60

1  
2  
3 presumably examines the relevant system) but does not actually complete a full  
4 admission note, which is then completed by the surgical house officer. Anecdotal  
5 experience shows that in recent years, junior staff completing the admission note often  
6 do not feel it is necessary to repeat the examination of the relevant system, especially as  
7 further examination of a tender abdomen or fractured limb can cause discomfort. This  
8 is borne out by the subgroup analysis finding showing that in the 2010s year group the  
9 registrars documented RelSystem in 97% of admissions, compared to 65% of house  
10 surgeons.  
11  
12  
13  
14  
15  
16  
17  
18  
19

20  
21  
22  
23  
24 There were several limitations to our study. These include its retrospective nature, the  
25 use of the “surrogate” marker of the medical record to reflect clinical examination  
26 skills, and the confusing admission process, whereby doctors will see a patient but not  
27 necessarily “admit” them. In addition, database restrictions in the medical records  
28 department meant we were only able to request medical admission files from 1998  
29 onwards. The study could have had greater statistical impact if we were able to access  
30 large numbers of records from much earlier. We were able to obtain some earlier  
31 admission notes, when these were co-filed with more contemporary records, although  
32 these were not randomly selected. However these earlier notes were at least 10 years  
33 apart from the other records, there was only one older file per patient, and statistical  
34 analysis showed no difference in patient age across the year groups. This was single-  
35 centre study, hence further research is warranted at other national and international  
36 hospitals. Finally, our data was extracted by only one researcher, the first author,  
37 however this was closely supervised and verified by two other researchers.  
38  
39  
40  
41  
42  
43  
44  
45  
46  
47  
48  
49  
50  
51  
52  
53  
54  
55  
56  
57  
58  
59  
60

1  
2  
3 This is the second study from Wellington Hospital that has identified the declining  
4  
5 quality of the hospital admission note with regard to physical examination. A previous  
6  
7 Wellington study concluded that there has been a decline in the quality of the surgical  
8  
9 house surgeon admission note (SHSurgAdN) when comparing 2005 and 2009 (Morgan  
10  
11 TG, Dennet ER. Quality of House Surgeon Acute Surgical Admissions, 2005 vs 2009.  
12  
13 (personal communication)). The authors found that the SHSurgAdN was comparatively  
14  
15 deficient in the documentation of the relevant system examination and the cardio-  
16  
17 respiratory examination, and that this deficiency had worsened over the intervening four  
18  
19 years. This study faced similar limitations as the current study, ie it was single-centred,  
20  
21 retrospective, the admission note was used as a surrogate for the assessment of the  
22  
23 junior doctors physical examination skills, and the admission process is complicated.  
24  
25 However it was well designed and had good power, with 100 admission notes audited in  
26  
27 total. This study differed from the current study in that it incorporated a house surgeon  
28  
29 questionnaire, with questions on history taking as well as clinical examination. The  
30  
31 current study involves the investigation of an even greater number of admissions over a  
32  
33 longer time period, with more extracted data.  
34  
35  
36  
37  
38  
39  
40  
41

42 There are potential solutions to halt this decline in physical examination skills. Some  
43  
44 local barriers to clinical competence have been identified and ways to improve this  
45  
46 deficit have been suggested. <sup>(7)</sup> In the authors' opinion, these could include increased  
47  
48 senior supervision of the admitting process including formative feedback and reflection,  
49  
50 as well as a local cultural change enabling house surgeons to initially assess patients  
51  
52 while senior staff provide supervision and guidance. This would require increased  
53  
54 junior staffing or work-based changes to address workload issues, as well as  
55  
56 commitment from senior colleagues to ensure that there is no compromise to patient  
57  
58  
59  
60

1  
2  
3 safety. Finally, international evidence suggests that improved undergraduate curriculum  
4  
5 especially bedside teaching and enhanced supervision of new doctors could redirect the  
6  
7 current downward trend in physical examination. <sup>(6, 8, 10, 11)</sup>  
8  
9

10  
11  
12  
13 During the audit process in this study, there was also significant variation in the history  
14  
15 component of the admission note. The history is a vital part of the admission process,  
16  
17 and is crucial to diagnostic success. <sup>(25, 26)</sup> Further research is warranted regarding the  
18  
19 adequacy of history taking as evidenced by the admission record.  
20  
21  
22  
23  
24  
25  
26  
27  
28  
29  
30  
31  
32  
33  
34  
35  
36  
37  
38  
39  
40  
41  
42  
43  
44  
45  
46  
47  
48  
49

50 **Competing interest statement:** All authors have completed the Unified  
51  
52 Competing Interest form at [http://www.icmje.org/coi\\_disclosure.pdf](http://www.icmje.org/coi_disclosure.pdf) (available  
53  
54 on request from the corresponding author) and declare: no support from any  
55  
56 organisation for the submitted work; no financial relationships with any  
57  
58  
59  
60

1  
2  
3 organisations that might have an interest in the submitted work in the previous  
4  
5 three years, no other relationships or activities that could appear to have  
6  
7 influenced the submitted work.  
8  
9

10  
11 **Exclusive license statement:** The Corresponding Author has the right to grant  
12  
13 on behalf of all authors and does grant on behalf of all authors, a non exclusive  
14  
15 license on a worldwide basis to the BMJ Publishing Group Ltd and its Licensees  
16  
17 to permit this article (if accepted) to be published in BMJ editions and any other  
18  
19 BMJPGGL products and sublicenses to exploit all subsidiary rights, as set out in  
20  
21 our license.  
22  
23  
24  
25  
26  
27  
28

29 **Authorship and Contributorship statement:** The authors listed have made  
30  
31 significant contributions to this paper. First author Ms. Oliver was involved in  
32  
33 the extraction and processing of data, data analysis and interpretation, literature  
34  
35 search, discussion points and initial draft formation. Second and corresponding  
36  
37 author Dr Hunter is not only involved in an administrative and communication  
38  
39 capacity but has contributed significantly with respect to study design, data  
40  
41 extraction and analysis, interpretation and statistical analysis, literature search,  
42  
43 and final paper revisions. Third author Dr Takayoshi is responsible for the  
44  
45 statistical analysis and figures. Last author Associate Professor Galletly  
46  
47 designed the study and was involved in the extraction of the data, interpretation  
48  
49 of the data and critical review of the publication.  
50  
51  
52  
53  
54  
55  
56  
57  
58  
59  
60

1  
2  
3  
4  
5  
6  
7  
8  
9  
10  
11  
12  
13  
14  
15  
16  
17  
18  
19  
20  
21  
22  
23  
24  
25  
26  
27  
28  
29  
30  
31  
32  
33  
34  
35  
36  
37  
38  
39  
40  
41  
42  
43  
44  
45  
46  
47  
48  
49  
50  
51  
52  
53  
54  
55  
56  
57  
58  
59  
60

**Acknowledgements:** The original project was funded by the Research Office in the University of Otago Wellington. The authors would like to thank Professor Michael Harrison for his advice and help in revision of the paper.

**Data Sharing**

No additional data available.

For peer review only



## References

1. Li J. Clinical skills in the 21st century. *Archives of Internal Medicine*. 1994;154(1):22.
2. Kern DC, Parrinog TA, Korst DR. The lasting value of clinical skills. *Journal of the American Medical Association*. 1985;254(1):70.
3. Lembo NJ, Dell'Italia LJ, Crawford MH, et al. Bedside diagnosis of systolic murmurs. *New England Journal of Medicine*. 1988;318(24):1572-8.
4. Reilly B. Physical examination in the care of medical inpatients: an observational study. *The Lancet*. 2003;362(9390):1100-5.
5. Shaver JA. Cardiac auscultation: a cost-effective diagnostic skill. *Current problems in cardiology*. 1995;20(7):441.
6. Chan-Yan C, Gillies JH, Ruedy J, et al. Clinical skills of medical residents: a review of physical examination. *Canadian Medical Association Journal*. 1988;139(7):629.
7. Sheehan D, Wilkinson TJ, Billett S. Interns' participation and learning in clinical environments in a New Zealand hospital. *Acad Med*. 2005 Mar;80(3):302-8.
8. Mangione S, Peitzman S. Physical diagnosis in the 1990s. Art or artifact? *Journal of general internal medicine*. 1996;11(8):490-3.
9. Tavel M. Cardiac Auscultation: A Glorious Past - But Does It Have a Future? *Circulation*. 1996;93(6):1250-3.
10. LaCombe MA. On bedside teaching. *Annals of Internal Medicine*. 1997;126(3):217.
11. Crumlish CM, Yialamas MA, McMahon GT. Quantification of bedside teaching by an academic hospitalist group. *Journal of Hospital Medicine*. 2009;4(5):304-7.

12. Williams KN, Ramani S, Fraser B, et al. Improving bedside teaching: findings from a focus group of study learners. *Academic Medicine*. 2008;83(3):257.
13. Cole's Medical Practice in New Zealand. Wellington Medical Council of New Zealand. 2011.
14. Baker MD, Schoenfeld PS. Documentation in the pediatric emergency department: A review of resuscitation cases. *Annals of Emergency Medicine*. 1991;20(6):641-3.
15. Cox JL, Zitner D, Courtney KD, et al. Undocumented patient information: an impediment to quality of care. *American Journal of Medicine*. 2003;114(3):211-6.
16. Dunlay SMMD, Alexander KPMD, Melloni CMD, et al. Medical Records and Quality of Care in Acute Coronary Syndromes: Results from CRUSADE. *Archives of Internal Medicine*. 2008;168(15):1692-8.
17. Hicks TA, Gentleman CA. Improving physician documentation through a clinical documentation management program. *Nursing Administration Quarterly*. 2003;27(4):285.
18. Liesenfeld B, Heekeren H, Schade G, et al. Quality of documentation in medical reports of diabetic patients. *International Journal for Quality in Health Care*. 1996;8(6):537-42.
19. Miller JM, Velanovich V. The natural language of the surgeon's clinical note in outcomes assessment: a qualitative analysis of the medical record. *American Journal of Surgery*. 2010;199(6):817-22.
20. Denny JC, Miller RA, Johnson KB, et al. Development and evaluation of a clinical note section header terminology [Evaluation Studies Research Support, U.S. Gov't, P.H.S.]. *AMIA Annual Symposium proceedings*. 2008:156-60.

- 1  
2  
3 21. Tinsley JA. An educational intervention to improve residents' inpatient charting.  
4  
5 Academic Psychiatry. 2004  
6  
7  
8 ;28(2):136-9.  
9
- 10 22. Smith JJ, Bland SA, Mullett S. Temperature - the forgotten vital sign  
11  
12 [Evaluation studies]. Accident and Emergency Nursing 2005;13(4):247-50.  
13
- 14 23. Kanegaye JT, Cheng JC, McCaslin RI, et al. Improved documentation of wound  
15  
16 care with a structured encounter form in the pediatric emergency department  
17  
18 [Evaluation Studies]. Ambulatory Pediatrics. 2005;5(4):253-7.  
19
- 20 24. Khan R, Fernandez C, Kashig F, et al. Combined orthogeriatric care in the  
21  
22 management of hip fractures: a prospective study. Annals of the Royal College of  
23  
24 Surgeons of England. 2002;84:122-4.  
25
- 26 25. Peterson MC, Holbrook JH, Hales D. Contributions of the History, Physical  
27  
28 Examination and Laboratory Investigation in Making Medical Diagnoses. . British  
29  
30 Medical Journal. 1992;156:163-5.  
31  
32
- 33 26. Hampton JR, M.J.G H, J.R.A. M. Relative contributions of history-taking,  
34  
35 physical examination, and laboratory investigation to diagnosis and management of  
36  
37 medical outpatients. . British Medical Journal. 1975;2(486-489).  
38  
39  
40  
41  
42  
43  
44  
45  
46  
47  
48  
49  
50  
51  
52  
53  
54  
55  
56  
57  
58  
59  
60

1  
2  
3  
4  
5  
6  
7  
8  
9  
10  
11  
12  
13  
14  
15  
16  
17  
18  
19  
20  
21  
22  
23  
24  
25  
26  
27  
28  
29  
30  
31  
32  
33  
34  
35  
36  
37  
38  
39  
40  
41  
42  
43  
44  
45  
46  
47  
48  
49  
50  
51  
52  
53  
54  
55  
56  
57  
58  
59  
60

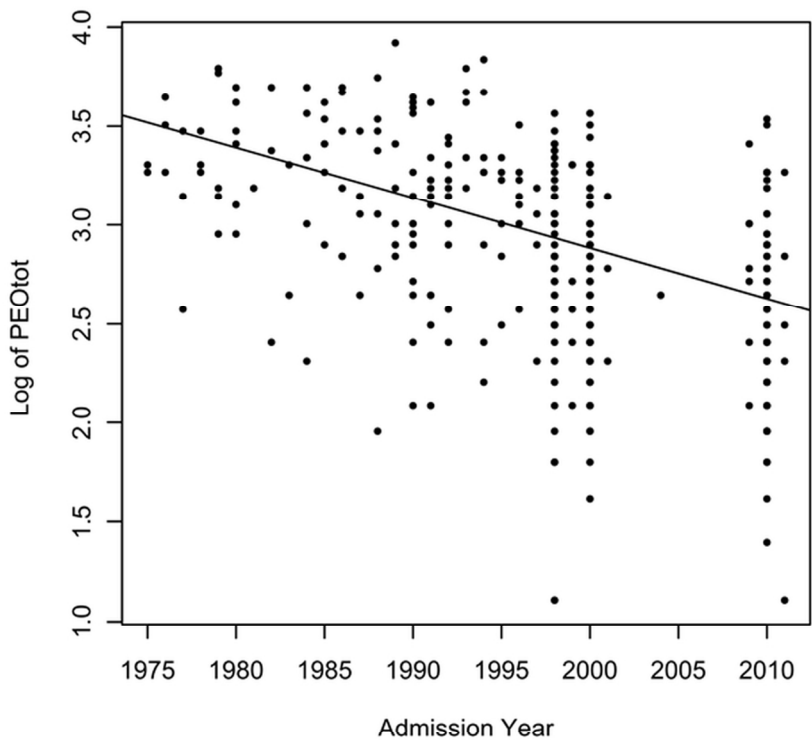

Figure 1: Total number of physical examination observations per admission (PEOtot) versus time.

105x90mm (300 x 300 DPI)

For peer review only

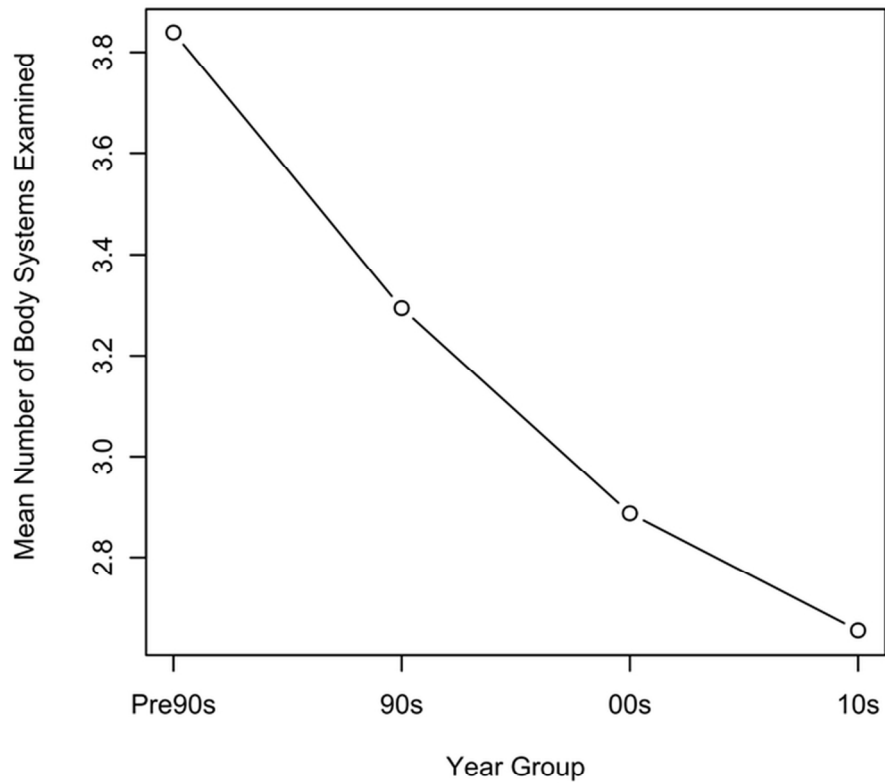

Figure 2: Mean number of body systems examined per year group.

99x90mm (300 x 300 DPI)

only

1  
2  
3  
4  
5  
6  
7  
8  
9  
10  
11  
12  
13  
14  
15  
16  
17  
18  
19  
20  
21  
22  
23  
24  
25  
26  
27  
28  
29  
30  
31  
32  
33  
34  
35  
36  
37  
38  
39  
40  
41  
42  
43  
44  
45  
46  
47  
48  
49  
50  
51  
52  
53  
54  
55  
56  
57  
58  
59  
60

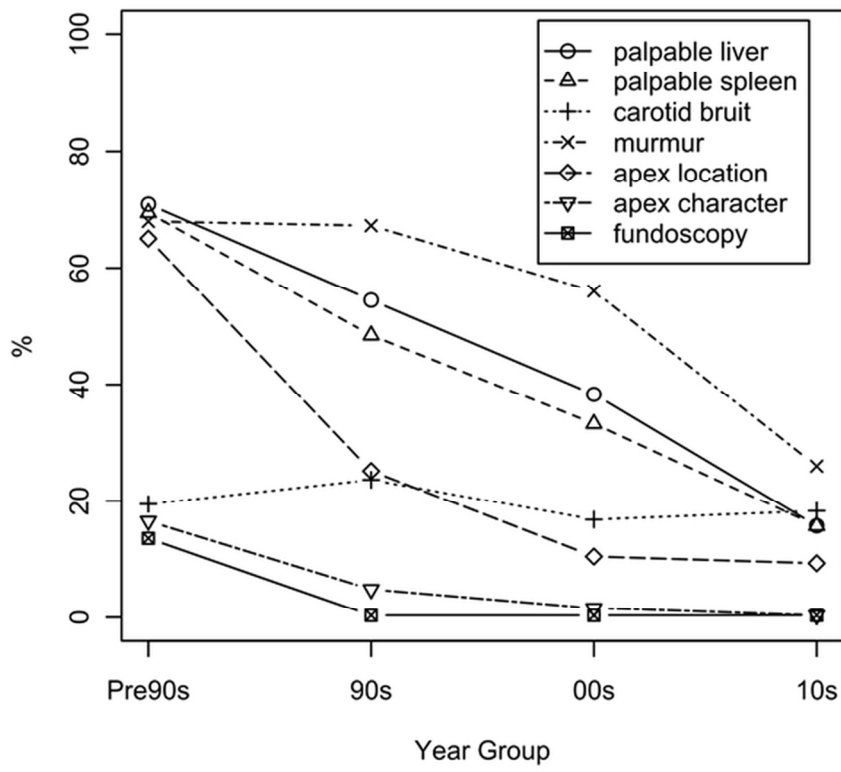

Figure 3a: Percentage of admission notes with recorded examinations for palpable liver, palpable spleen, carotid bruit, murmur, apex location, apex character and funduscopy versus year group.

93x90mm (300 x 300 DPI)

only

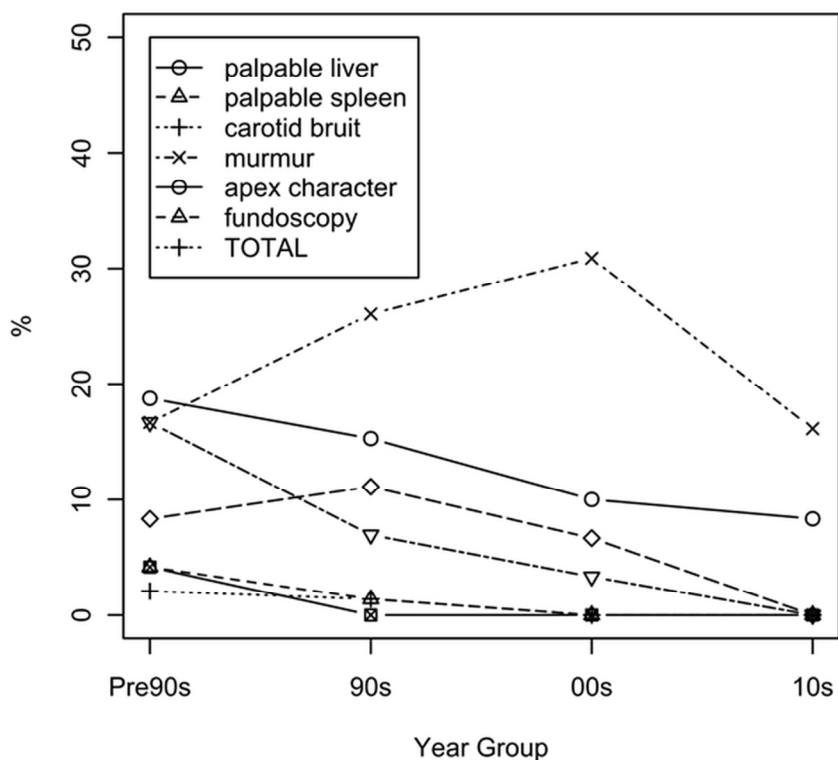

Figure 3b: Percentage of admission notes with positive findings for palpable liver, palpable spleen, carotid bruit, murmur, apex location, apex character and funduscopy versus year group.

97x90mm (300 x 300 DPI)

only
